# Supplementary material for: Drug Repositioning of Inflammatory Bowel Disease Based on Co-Target Gene Expression Signature of Glucocorticoid Receptor and TET2
Source: MDPI journal article supplement (doi:10.3390/biology13020082), 2024-01-29
Supplement: s1 [file s1]

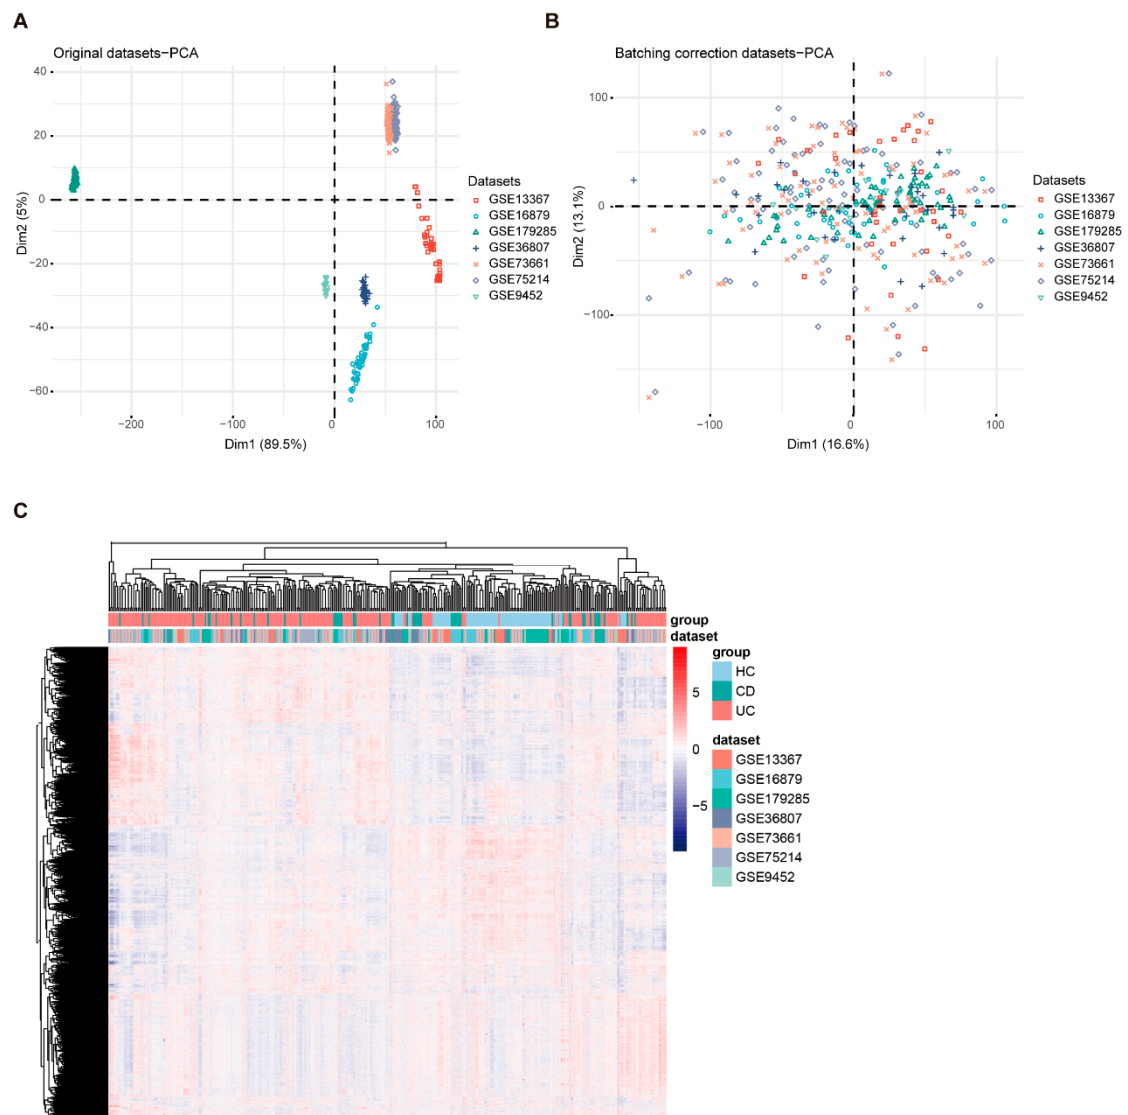

**Figure S1.** Data preprocessing. (A) PCA of original IBD datasets before bath-effect correction. (B) PCA of the integrated dataset after batch-effect correction. (C) A heatmap of the integrated dataset after batch-effect.

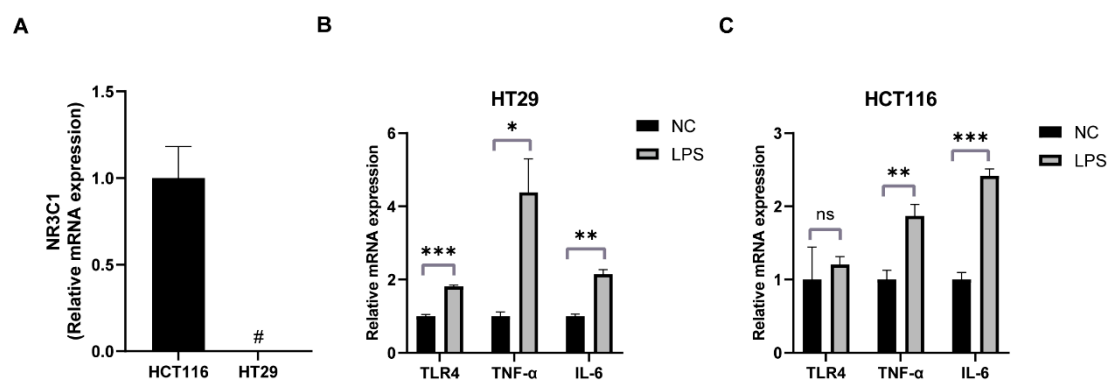

**Figure S2.** Construction of the *in vitro* inflammatory cell models. (A) Comparison of the baseline levels of GR expression between HT29 cells and HCT116 cells. # bare expression compared to the HCT116 cells. The expression of inflammatory factors TLR4, TNF- $\alpha$ , and IL-6 in (B) HT29 cells

and (C) HCT116 cells both treated with LPS for 24 h. Values are expressed as the means  $\pm$  SD,  $n = 3$  in each group. \*  $p < 0.05$ , \*\*  $p < 0.01$ , \*\*\*  $p < 0.001$ , and ns not significant.

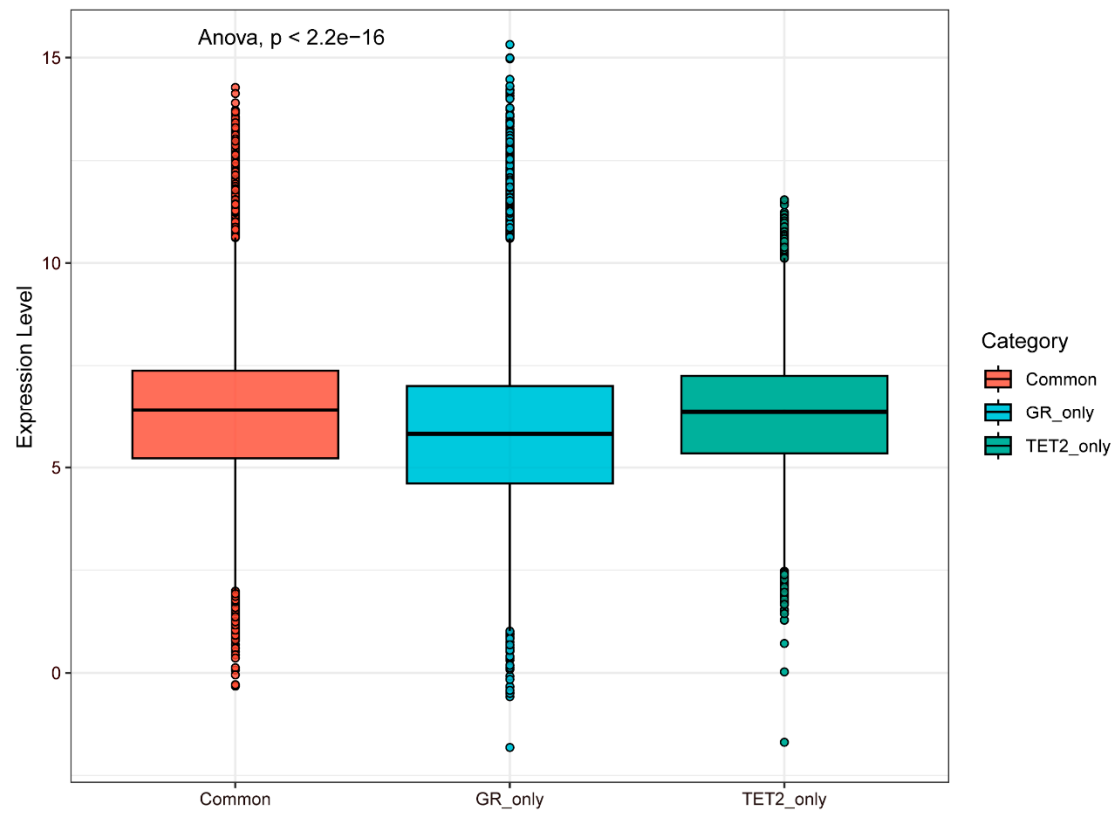

**Figure S3.** A one-way ANOVA analysis was performed to examine the differential impact of transcription factor regulation (GR only, TET2 only, and Common) on gene expression levels.
