# Supplementary material for: Drug Repositioning of Inflammatory Bowel Disease Based on Co-Target Gene Expression Signature of Glucocorticoid Receptor and TET2
Source: Biology (Basel). 2024 Jan 29;13(2):82. doi: 10.3390/biology13020082 (PMC10886832; doi:10.3390/biology13020082)
Supplement: Supplementary file 1 [file biology-13-00082-s001.zip › Supplementary Tables.xlsx]

## Sheet: Supplementary Tables
Supplementary Table	Description
Table S1	Characteristics of seven transcriptome datasets used in the study
Table S2	GR and TET2 putative co-target genes (n = 6101)
Table S3	IBD signatures obtained from microarray analysis
Table S4	179 GR- and TET2-related CD DEGs
Table S5	401 GR- and TET2-related UC DEGs
Table S6	GO results after rrvgo of GR- and TET2-related CD and UC DEGs
Table S7	MSigDB pathway results of GR- and TET2-related CD and UC DEGs
Table S8	Cell type-specific expression analysis (CSEA) on GR- and TET2-related CD DEGs after filtering
Table S9	Cell type-specific expression analysis (CSEA) on GR- and TET2-related UC DEGs after filtering
Table S10	The genes profile derived from the in vitro inflammation model for CMap querying
Table S11	The top 10 potential compounds for IBD treatment based on CMap analysis

## Sheet: Table S1
Supplementary Table 1 Characteristics of seven transcriptome datasets used in the study
GEO accession	Data type	Country	Platform	UC(number)	CD(number)	HC(number)
GSE75214	microarray	Belgium	GPL6244	74	8	11
GSE16879	microarray	Belgium	GPL570	24	19	6
GSE179285	microarray	USA	GPL6480	23	14	23
GSE36807	microarray	United Kingdom	GPL570	15	13	7
GSE73661	microarray	Belgium	GPL6244	67	/	12
GSE9452	microarray	Denmark	GPL570	8	/	5
GSE13367	microarray	Denmark	GPL570	16	/	20

## Sheet: Table S2
Supplementary Table 2 GR and TET2 putative co-target genes
Gene
RTCA
DBT
RTCA-AS1
DPH5
LOC102606465
HES4
AGRN
ISG15
AMY2B
PGD
CORT
VAV3
SLC25A24
FNDC7
PRPF38B
AKNAD1
SPATA42
GPSM2
TAF13
TMEM167B
SCARNA2
C1orf194
KIAA1324
SARS
PSMA5
SYPL2
CYB561D1
ATXN7L2
AMIGO1
EPS8L3
SLC6A17
UBL4B
SLC16A4
LAMTOR5
LAMTOR5-AS1
PROK1
KCNA3
TMIGD3
RAP1A
LINC01160
FAM212B
FAM212B-AS1
DDX20
LOC101928718
MTOR
WNT2B
UBIAD1
MOV10
SLC16A1
SLC16A1-AS1
LRIG2
LOC100996251
PHTF1
RSBN1
AP4B1-AS1
BCL2L15
AP4B1
DCLRE1B
HIPK1
HIPK1-AS1
OLFML3
DENND2C
AMPD1
NRAS
CSDE1
SIKE1
PTCHD2
TSPAN2
NGF
TTF2
LOC101929099
TRIM45
MAN1A2
PLOD1
KIAA2013
MFN2
PHGDH
VPS13D
SNORA59B
SNORA59A
MXRA8
DVL1
CCNL2
AURKAIP1
LOC148413
RNVU1-18
RNU1-28P
RNU1-3
RNU1-4
RNU1-27P
RNU1-2
RNU1-1
RNVU1-15
RNVU1-14
POLR3C
RNF115
NUDT17
MIR6736
PEX11B
ITGA10
GNRHR2
RBM8A
TXNIP
HFE2
RNVU1-6
LOC101928979
NBPF13P
RNVU1-8
PRKAB2
PDIA3P1
LINC00624
BCL9
ACP6
PDZK1P2
RNVU1-7
MIR5087
RNVU1-10
MIR6077
RNU1-13P
RNVU1-3
LOC100132057
KAZN
LINC00869
SV2A
SF3B4
BOLA1
OTUD7B
VPS45
ANP32E
CA14
APH1A
CIART
C1orf54
MRPS21
ECM1
TARS2
FALEC
MIR6878
MCL1
ADAMTSL4
MIR4257
ADAMTSL4-AS1
ATAD3A
CDC42SE1
MLLT11
C1orf56
GABPB2
LYSMD1
SEMA6C
TNFAIP8L2-SCNM1
SCNM1
TNFAIP8L2
VPS72
TMOD4
ZNF687
SELENBP1
CGN
TUFT1
MIR554
THEM4
S100A3
S100A4
S100A5
LOC101928034
S100A2
S100A14
S100A16
S100A13
CHTOP
S100A1
SNAPIN
NPR1
ILF2
MIR8083
SLC27A3
LOC343052
DENND4B
GATAD2B
CREB3L4
SLC39A1
CRTC2
MIR6737
RPS27
RAB13
JTB
C1orf189
TPM3
C1orf43
UBAP2L
MIR190B
PMVK
PBXIP1
PYGO2
SHC1
FLAD1
CKS1B
LENEP
MIR4258
ZBTB7B
SLC50A1
EFNA1
DPM3
MUC1
TRIM46
KRTCAP2
MIR92B
THBS3
MTX1
GBAP1
GBA
FAM189B
CLK2
SCAMP3
ASH1L
ASH1L-AS1
YY1AP1
DAP3
KIAA0907
RXFP4
SNORA80E
SCARNA4
MIR6738
LAMTOR2
UBQLN4
MEX3A
LMNA
RAB25
AGMAT
DDI2
PMF1
PMF1-BGLAP
BGLAP
VHLL
GLMP
SMG5
TMEM79
C1orf61
MEF2D
GPATCH4
HAPLN2
BCAN
APOA1BP
NES
RRNAD1
ISG20L2
HDGF
MRPL24
NTRK1
SH2D2A
INSRR
PEAR1
ETV3L
C1orf233
SSU72
UQCRHL
MIR5096
VSIG8
C1orf204
SLAMF8
CFAP45
MIR4259
TAGLN2
IGSF9
DCAF8
F11R
TSTD1
CFAP126
FCGR3A
FCGR2A
HSPA6
FCRLB
DUSP12
ATF6
NOS1AP
C1orf226
C1orf111
UAP1
RGS5
NUF2
PBX1
MIR3675
CDK11B
MMP23B
MMP23A
NBPF1
CROCCP2
MST1P2
FAM231A
POGK
LINC01363
POU2F1
RCSD1
DCAF6
MPC2
ADCY10
TIPRL
CROCC
ATP1B1
KLHL20
CENPL
DARS2
RABGAP1L
LOC102724601
RASAL2
AXDND1
TOR1AIP2
TOR1AIP1
CEP350
ACBD6
XPR1
MR1
IER5
GLUL
TEDDM1
LINC00272
NPL
ARPC5
RGL1
APOBEC4
TSEN15
COLGALT2
C1orf21
EDEM3
FAM129A
SWT1
TRMT1L
UBR4
RGS2
TROVE2
UCHL5
DENND1B
LHX9
NEK7
NR5A2
DDX59
LOC101929224
C1orf106
IGFN1
TMEM9
TNNI1
PHLDA3
CSRP1
NAV1
MIR5191
LMOD1
ELF3
PPP1R12B
UBE2T
KLHL12
PPFIA4
LINC01353
BTG2
LINC01136
ETNK2
LOC101929441
REN
PPP1R15B
MDM4
PIK3C2B
CAMK2N1
MUL1
DSTYK
TMCC2
NUAK2
KLHDC8A
LEMD1-AS1
CDK18
LOC284578
NUCKS1
SLC41A1
FAM72A
SRGAP2
DDOST
EIF2D
KIF17
CD55
PRKCZ
IRF6
DIEXF
LINC00467
RD3
TMEM206
NENF
ECE1
LOC101929565
ATF3
FAM71A
NSL1
TATDN3
RPS6KC1
PTPN14
KCTD3
C1orf86
RRP15
EPRS
BPNT1
IARS2
MIR215
MIR194-1
AURKAPS1
CDC42
CELA3A
LINC00339
LOC101928043
RAB3GAP2
2023-03-01
HLX
HLX-AS1
DUSP10
MIA3
BROX
AIDA
FAM177B
CAPN2
TP53BP2
DEGS1
LOC101927143
NVL
ZBTB40
LBR
SRP9
LEFTY2
PYCR2
MIR6741
SDE2
ACBD3
LIN9
PARP1
ITPKB-IT1
ITPKB
ADCK3
CDC42BPA
ZNF678
JMJD4
SNAP47
LOC100130093
GUK1
IBA57
GJC2
IBA57-AS1
RNF187
BTNL10
HIST3H2A
HIST3H2BB
MIR4666A
DUSP5P1
RNA5S1
RNA5S2
RNA5S3
RNA5S4
RNA5S5
RNA5S6
RNA5S7
RNA5S8
RNA5S9
RNA5S10
RNA5S11
RNA5S12
RNA5S13
RNA5S14
RNA5S15
RNA5S16
RNA5S17
RHOU
MIR7641-2
NUP133
LOC101927478
ABCB10
TAF5L
URB2
LACTBL1
KDM1A
C1orf234
MIR3115
COG2
MIR1182
FAM89A
LOC149373
C1orf131
GNPAT
SPRTN
EXOC8
LINC00582
DISC1
KCNK1
MIR4427
ZNF436
HNRNPR
ZNF436-AS1
COA6
LOC101927765
TARBP1
LINC01354
IRF2BP2
LINC00184
LINC01132
LOC101927851
TOMM20
SNORA14B
TBCE
ID3
GNG4
LYST
NID1
MTR
MT1HL1
RYR2
TCEB3
SRSF10
PNRC2
MORN1
PEX10
RER1
RGS7
CHML
OPN3
WDR64
EXO1
MAP1LC3C
GRHL3
AKT3
ZBTB18
C1orf100
ADSS
C1orf101
DESI2
HNRNPU
COX20
HNRNPU-AS1
EFCAB2
LOC101928068
KIF26B
SRRM1
SEPN1
STMN1
AUNIP
PAQR7
MIR3917
EXTL1
CEP85
LOC101928303
ZNF683
LIN28A
MMEL1
DHDDS
HMGN2
LOC101928324
ARID1A
PIGV
NUDC
GPN2
NR0B2
GPATCH3
SYTL1
TMEM222
ACTG1P20
RNU6-48P
FAM76A
PPP1R8
SCARNA1
SMPDL3B
RPA2
PHACTR4
TRNAU1AP
SNORA44
SNORA61
SNORA16A
SNORD99
SNHG12
RAB42
TAF12
GMEB1
RNU11
YTHDF2
EPB41
TMEM200B
SRSF4
MATN1
MATN1-AS1
MIR4420
PUM1
SERINC2
HCRTR1
PEF1
COL16A1
PTP4A2
KPNA6
MIR5585
DCDC2B
IQCC
CCDC28B
TXLNA
EIF3I
LCK
TMEM234
FAM167B
MTMR9LP
HDAC1
ZBTB8B
ZBTB8A
RBBP4
ZBTB8OS
RNF19B
AK2
AZIN2
A3GALT2
PHC2
MIR3605
LOC101929464
ARHGEF16
SMIM12
NCDN
KIAA0319L
TFAP2E
AGO4
TRAPPC3
MAP7D1
MRPS15
OSCP1
CSF3R
TP73
WRAP73
C1orf109
CDCA8
FHL3
SF3A3
UTP11L
NDUFS5
MYCL
TRIT1
TMCO2
ZMPSTE24
NFYC
NFYC-AS1
FOXJ3
RIMKLA
PPCS
ZMYND12
YBX1
PPIH
ELOVL1
ST3GAL3
KDM4A-AS1
ARTN
ATP6V0B
DPH2
DMAP1
ERI3-IT1
RNF220
C1orf228
TMEM53
RNU5F-1
KIF2C
RNU5D-1
RPS8
BEST4
SNORD55
SNORD46
SNORD38A
SNORD38B
PLK3
TCTEX1D4
BTBD19
PTCH2
AKR1A1
PRDX1
MAST2
PIK3R3
LOC101929626
NSUN4
KNCN
MKNK1
PDZK1IP1
LINC00853
STIL
CMPK1
CDKN2C
FAF1
NRD1
FAM159A
COA7
ZYG11B
SCP2
MIR5095
MIR1273F
MIR1273G
CPT2
C1orf123
MAGOH
LOC100507564
PARS2
DHCR24
USP24
LOC100507634
MIR4422
PPAP2B
JUN
LINC01135
LINC01358
HOOK1
NFIA
TM2D1
INADL
USP1
MIR6723
LOC101928626
ITGB3BP
EFCAB7
DLEU2L
PGM1
ROR1
UBE2U
CACHD1
JAK1
AK4
DNAJC6
ZBTB48
NOL9
TAS1R1
THAP3
MIER1
WDR78
DNAJC11
LOC100505887
SLC35D1
SERBP1
GADD45A
GNG12
GNG12-AS1
CAMTA1
WLS
DEPDC1
DEPDC1-AS1
CTH
MIR186
CRYZ
TYW3
MSH4
RABGGTB
SNORD45B
SNORD45A
SNORD45C
ZZZ3
USP33
FAM73A
DNAJB4
PARK7
ADGRL2
RERE
LOC102724552
PRKACB
GNG5
LPAR3
SYDE2
BCL10
C1orf52
LOC646626
HS2ST1
2023-09-15
PKN2
PKN2-AS1
LRRC8B
SAMD11
LOC100130417
SLC2A5
CDC7
TGFBR3
SETSIP
BTBD8
EVI5
FAM69A
MTF2
TMED5
CCDC18
DR1
LOC100131564
BCAR3
GCLM
DNTTIP2
PLEKHN1
NOC2L
KLHL17
ARHGAP29
LOC100506022
ABCD3
TMEM56
TMEM56-RWDD3
ALG14
CTNNBIP1
SLC35A3
C10orf2
SEMA4G
MRPL43
LZTS2
MIR608
PDZD7
KAZALD1
SFXN3
LOC101927419
POLL
DPCD
MGEA5
KCNIP2
KCNIP2-AS1
C10orf76
HPS6
LDB1
PPRC1
NOLC1
GBF1
PITX3
ELOVL3
NFKB2
PSD
CUEDC2
FBXL15
MIR146B
RPARP-AS1
TMEM180
C10orf95
TRIM8
CYP17A1
C10orf32
C10orf32-ASMT
AS3MT
PCGF6
USMG5
TAF5
PDCD11
MIR1307
CALHM3
NEURL1
NEURL1-AS1
OBFC1
IDI1
WDR37
IDI2
IDI2-AS1
GSTO1
CFAP43
XPNPEP1
ADD3
ADD3-AS1
SMC3
TCF7L2
ADRB1
ABLIM1
ATRNL1
PNLIPRP1
PNLIPRP2
PDZD8
EMX2
EMX2OS
PRLHR
CACUL1
PRDX3
GRK5
SFXN4
BAG3
MCMBP
SEC23IP
UPF2
DHTKD1
FGFR2
ATE1
ATE1-AS1
NSMCE4A
TACC2
BUB3
HMX3
HMX2
NKX1-2
LHPP
METTL10
FAM175B
ZRANB1
CTBP2
MIR548Q
MIR4297
CTAGE7P
GLRX3
INPP5A
FUOM
ECHS1
PAOX
MIR3944
MTG1
DCLRE1C
MEIG1
VIM
TRDMT1
VIM-AS1
ARL5B
NSUN6
CASC10
MIR1915
SKIDA1
MLLT10
LOC100499489
OTUD1
THNSL1
ENKUR
ABI1
PITRM1
EPC1
ITGB1
CREM
KLF6
ZNF37BP
BMS1
ZNF487
CXCL12
C10orf10
RASSF4
TMEM72-AS1
C10orf25
ZNF22
NCOA4
MSMB
AGAP7P
AGAP9
BMS1P6
CTSLP2
ERCC6
ERCC6-PGBD3
PGBD3
ASAH2B
PRKG1
LOC102724719
CALML3
CALML3-AS1
CISD1
IPMK
ANKRD16
FBXO18
RHOBTB1
PFKFB3
MIR3155A
MIR3155B
ARID5B
RTKN2
PRR26
MIR5699
EGR2
ADO
DIP2C
DNAJC12
PBLD
HNRNPH3
SLC25A16
DDX50
KIAA1279
COL13A1
TYSND1
SAR1A
PPA1
NPFFR1
LRRC20
EIF4EBP2
NODAL
PALD1
UNC5B
UNC5B-AS1
PSAP
DDIT4
DNAJB12
DNAJC9
MRPS16
DNAJC9-AS1
SFMBT2
KAT6B
DUSP13
SAMD8
COMTD1
ZNF503-AS1
ZNF503
ZNF503-AS2
LOC101929234
C10orf11
ZMIZ1
ZMIZ1-AS1
CCSER2
BMPR1A
PTEN
KLLN
PANK1
PCGF5
NUDT9P1
TNKS2
TNKS2-AS1
CPEB3
2023-03-05
KIF11
IDE
ACSM6
PDLIM1
ENTPD1
TM9SF3
LCOR
MIR607
ARHGAP19
ARHGAP19-SLIT1
FRAT1
FRAT2
ZDHHC16
PGAM1
EXOSC1
AVPI1
MARVELD1
MIR4685
HPS1
NKX2-3
LINC01475
ENTPD7
BIRC3
BIRC2
ADM
SBF2
CAND1.11
LYVE1
MRVI1
CTR9
SLC35F2
CUL5
HTR3B
C11orf71
RBM7
LOC101928940
BUD13
APOA5
ZPR1
BACE1
CD3G
CD3D
ATP5L
LOC100131626
KMT2A
USP47
ARCN1
IFT46
RPS25
HYOU1
SLC37A4
TRAPPC4
RPL23AP64
MIR3656
HMBS
HINFP
VPS11
C2CD2L
DPAGT1
H2AFX
PVRL1
LOC102724301
OAF
POU2F3
ARHGEF12
TMEM136
CLMP
SCN3B
MSANTD2
LOC100507283
ROBO3
PKNOX2
PKNOX2-AS1
PUS3
DDX25
CDON
PRDM10
LINC00167
APLP2
ST14
THYN1
ACAD8
NCAPD3
VPS26B
PSMA1
NUCB2
NAV2
LOC100126784
TSSC4
NAP1L4
OSBPL5
PAX6
DKFZp686K1684
PAUPAR
EIF3M
QSER1
DEPDC7
TCP11L1
HIPK3
FBXO3
FBXO3-AS1
NAT10
CAT
PRR5L
TRAF6
RHOG
STIM1
MIR4687
SEC14L1P1
C11orf49
LRP4
CELF1
PTPMT1
FAM180B
NDUFS3
KBTBD4
C1QTNF4
RASSF7
PHRF1
LMNTD2
LOC143666
MIR210
MIR210HG
P2RX3
SSRP1
SLC43A1
SMTNL1
TIMM10
SERPING1
UBE2L6
CLP1
ZDHHC5
YPEL4
MIR130A
CTNND1
TMX2
BTBD18
MED19
C11orf31
TMX2-CTNND1
IRF7
CYB561A3
DDB1
TKFC
FADS2
FEN1
FADS1
TMEM258
MIR611
MIR1908
MIR6747
EEF1G
ROM1
EML3
MTA2
TUT1
GANAB
METTL12
UQCC3
C11orf98
LBHD1
INTS5
SNORA57
UBXN1
HNRNPUL2
TAF6L
ZBTB3
TTC9C
HNRNPUL2-BSCL2
TMEM223
NXF1
TMEM179B
MIR6514
MIR6748
STX5
SLC3A2
WDR74
SNORD22
SNORD29
SNORD31
SNORD30
SNORD28
SNORD27
SNORD26
SNORD25
RNU2-2P
SNHG1
RTN3
ATL3
TEX40
GPR137
BAD
KCNK4
ESRRA
DRD4
CDHR5
SCT
MIR192
MIR194-2
MIR6749
MIR6750
TM7SF2
FAU
MRPL49
ZNHIT2
DPF2
TIGD3
SLC25A45
FRMD8
MIR612
MALAT1
SCYL1
MAP3K11
SIPA1
PCNXL3
MIR4690
KAT5
RNASEH2C
BANF1
EIF1AD
CST6
SART1
PELI3
MRPL11
NPAS4
BBS1
C11orf80
LRFN4
MRPL17
PPP1CA
CARNS1
TBC1D10C
CORO1B
CABP4
GPR152
GSTP1
NDUFV1
C11orf72
PPP6R3
IGHMBP2
MRPL21
FGF19
SHANK2
FOLR2
INPPL1
PDE2A
MIR4692
STARD10
FCHSD2
RAB6A
MRPL48
PPME1
C2CD3
TPBGL
SERPINH1
UVRAG
CASC23
TSPAN4
CD151
CRACR2B
PNPLA2
POLR2L
PCF11
STK33
PRSS23
SLC36A4
MIR548L
C11orf97
MRE11A
ANKRD49
FUT4
PIWIL4
AMOTL1
WEE1
CEP57
FAM76B
LOC440028
SBF2-AS1
RAD52
ERC1
CLEC7A
DRAM1
TXNRD1
EID3
SLC41A2
C12orf45
ALDH1L2
KIAA1033
LOC414300
APPL2
NUAK1
TCP11L2
RIC8B
LOC100287944
MTERF2
YBX3
LOC101928162
PRDM4
ASCL4
LOC101929162
CORO1C
SSH1
MIR619
USP30
USP30-AS1
TRPV4
MIR4497
GLTP
C12orf76
ARPC3
GPN3
FAM216A
VPS29
RAD9B
TCTN1
SH2B3
MAPKAPK5
MAPKAPK5-AS1
ERP29
TMEM116
MIR3657
TPCN1
IQCD
TBX3
ETV6
LINC00173
MAP1LC3B2
RNFT2
C12orf49
HRK
FBXW8
PEBP1
TAOK3
SUDS3
PRKAB1
RPLP0
GCN1L1
PXN-AS1
PXN
RNU4-2
RNU4-1
SIRT4
COX6A1
TRIAP1
GATC
DYNLL1
SRSF9
MLEC
UNC119B
ACADS
MIR4700
CAMKK2
ANAPC5
MLXIP
VPS33A
CLIP1-AS1
KNTC1
ZCCHC8
RSRC2
DENR
HCAR1
LRP6
VPS37B
C12orf65
MPHOSPH9
SBNO1
SETD8
MIR8072
RILPL1
MIR3908
TMED2
DDX55
LOC101927415
LOH12CR1
MANSC1
LOH12CR2
SCARB1
UBC
MIR5188
GPR19
CDKN1B
APOLD1
MIR613
DDX47
GPRC5A
RPL13AP20
MIR614
KIAA1467
STX2
ADGRD1
GSG1
PUS1
EP400
SNORA49
LOC100130238
PGAM5
POLE
PXMP2
ZNF140
HIST4H4
H2AFJ
WBP11
C12orf60
DERA
STRAP
DCP1B
CACNA1C-AS4
CACNA1C-IT3
KRAS
RASSF8
RASSF8-AS1
BHLHE41
TM7SF3
MED21
PPFIBP1
REP15
MRPS35
FKBP4
ITFG2
NRIP2
LOC100507424
FOXM1
RHNO1
TULP3
FAR2
DDX11
DDX11-AS1
KIAA1551
CPNE8
KDM5A
CCDC77
TWF1
RAD51AP1
C12orf4
SLC38A1
RPAP3
ENDOU
TMEM106C
COL2A1
PFKM
MIR6505
OR10AD1
CCDC184
DDX23
RND1
TUBA1B
TUBA1C
TROAP
LOC101927267
C1QL4
DNAJC22
SPATS2
KCNH3
NCKAP5L
BCDIN3D
BCDIN3D-AS1
ATF1
SLC11A2
LETMD1
SCN8A
NR4A1
ATG101
OR7E47P
KRT80
C12orf80
LINC00592
KRT7
ZNF740
CSAD
AAAS
PFDN5
C12orf10
CALCOCO1
CISTR
HOXC13
HOXC13-AS
HOXC9
HOXC4
HOXC10
HOXC8
HOXC6
HOXC5
MIR196A2
HOXC-AS1
HOXC-AS2
HOXC-AS3
MIR615
FLJ12825
LOC100240735
LOC400043
LOC100240734
SMUG1
CBX5
NFE2
HNRNPA1
LOC102724050
ZNF385A
SUOX
RPS26
ERBB3
PA2G4
RPL41
ESYT1
ZC3H10
PTGES3
TAC3
GPR182
ZBTB39
MYO1A
TMEM194A
STAT6
LRP1
NAB2
ARHGEF25
DTX3
SLC26A10
CDK4
AGAP2
TSPAN31
2023-03-09
AGAP2-AS1
MIR6759
CYP27B1
TSFM
METTL1
METTL21B
MON2
MIRLET7I
LINC01465
PPM1H
SRGAP1
TBK1
LEMD3
MSRB3
NOP2
IFFO1
SCARNA11
LPAR5
HELB
LAG3
PTMS
MLF2
USP5
GNB3
CDCA3
P3H3
TPI1
SPSB2
RAP1B
SNORA70G
MDM2
LOC100130075
CPSF6
LYZ
YEATS4
PHB2
C12orf57
PTPN6
EMG1
SCARNA12
RNU7-1
MIR141
MIR200C
CNOT2
LINC01481
TMEM19
THAP2
ZFC3H1
CAPS2
PHLDA1
FOXJ2
C3AR1
RIMKLB
POC1B
POC1B-GALNT4
GALNT4
LINC00936
C12orf79
BTG1
UBE2N
MRPL42
NR2C1
USP44
SNRPF
CDK17
TMPO
TMPO-AS1
LOC643770
PCCA
GGACT
ING1
CARS2
LINC00346
ARHGEF7
LINC01044
MCF2L
DCUN1D2
TMCO3
LINC01072
LATS2
SKA3
MRPL57
MIPEPP3
FGF9
RASL11A
MTIF3
GTF3A
LINC00572
LINC00544
LINC01058
USPL1
SMAD9
SUPT20H
FOXO1
MRPS31
SLC25A15
SUGT1P3
TPTE2P5
WBP4
SMIM2-IT1
SMIM2-AS1
RB1
LINC00441
CDADC1
MLNR
CAB39L
SETDB2
DLEU1
MRPS31P5
CKAP2
VPS36
HNRNPA1L2
PCDH9-AS2
PCDH9
DACH1
DIS3
PIBF1
KLF5
MYCBP2
SLAIN1
EDNRB
RNF219
RBM26
RBM26-AS1
NDFIP2
NDFIP2-AS1
SPRY2
TGDS
GPR180
ABCC4
DNAJC3
UGGT2
IPO5
DOCK9
DOCK9-AS2
ZIC2
ZIC5
LOC101927437
LINC00554
DIO3
PPP2R5C
DYNC1H1
MOK
RCOR1
CDC42BPB
EXOC3L4
EIF5
MARK3
BAG5
APOPT1
KLC1
PPP1R13B
LINC00637
C14orf2
TDRD9
RD3L
AKT1
ZBTB42
LINC00638
GPR132
CDCA4
C14orf80
CRIP2
CRIP1
PARP2
CCNB1IP1
RPPH1
SNORD126
KLHL33
TEP1
PNP
TMEM55B
APEX1
OSGEP
OR6S1
ANG
RNASE4
ZNF219
TMEM253
RAB2B
TOX4
SALL2
METTL3
LRP10
REM2
PRMT5
RBM23
HAUS4
MIR4707
LOC101926933
PRMT5-AS1
C14orf93
PSMB11
PSMB5
ACIN1
CDH24
C14orf119
CEBPE
BCL2L2
BCL2L2-PABPN1
PPP1R3E
PABPN1
DHRS4L2
DHRS4
DHRS4-AS1
DHRS4L1
LRRC16B
CPNE6
PCK2
NRL
DCAF11
PSME1
EMC9
FITM1
MIR7703
REC8
PSME2
IRF9
RNF31
IPO4
TM9SF1
TSSK4
MDP1
CHMP4A
TGM1
GMPR2
TINF2
NEDD8-MDP1
RABGGTA
NEDD8
DHRS1
NOP9
CBLN3
KHNYN
HECTD1
RNU6-1
RNU6-9
RNU6-7
RNU6-8
RNU6-2
EGLN3
EAPP
SRP54
FAM177A1
NFKBIA
RALGAPA1
BRMS1L
GEMIN2
SEC23A
CTAGE5
LOC100288846
FAM179B
KLHL28
MIS18BP1
RPS29
LRR1
RN7SL1
RPL36AL
MGAT2
DNAAF2
POLE2
KLHDC1
NEMF
RN7SL2
ARF6
C14orf183
ATL1
MAP4K5
SAV1
C14orf166
NID2
GNPNAT1
MIR4308
GCH1
WDHD1
SOCS4
MAPK1IP1L
JKAMP
GPR135
L3HYPDH
PPM1A
SIX1
SALRNA1
SIX4
MNAT1
SLC38A6
TRMT5
PRKCH
HIF1A
HIF1A-AS1
ZBTB1
ZBTB25
GPX2
FUT8
FUT8-AS1
GPHN
MPP5
ARG2
PIGH
ZFP36L1
EXD2
SMOC1
ZFYVE1
PSEN1
ACOT6
DNAL1
MIR4505
ELMSAN1
LOC100506476
ZNF410
PROX2
DLST
PGF
EIF2B2
TMED10
FOS
C14orf1
TTLL5
ANGEL1
LRRC74A
IRF2BPL
LOC283575
CIPC
LOC102724190
ISM2
STON2
ZC3H14
PTPN21
CALM1
SNORA11B
SMEK1
ATXN3
NDUFB1
CPSF2
ITPK1
SERPINA4
SERPINA5
DICER1
DICER1-AS1
MIR3173
LINC00341
SYNE3
BCL11B
ADAMTS17
SPATA41
CERS3-AS1
SNRPA1
VIMP
LOC100507472
PCSK6
TARSL2
BMF
PPP1R14D
NUSAP1
OIP5
MAPKBP1
SPTBN5
EHD4-AS1
EHD4
PLA2G4E-AS1
CASC4
TRIM69
B2M
LOC100419583
DUOXA1
DUOX2
DUOX1
DUOXA2
SEMA6D
RAB27A
PIGB
C15orf65
CCPG1
PRTG
ALDH1A2
FAM63B
ADAM10
BNIP2
FOXB1
ANXA2
RORA
C2CD4A
RPS27L
CA12
LOC102723344
PPIB
SNX22
PARP16
RNU5A-1
RNU5B-1
IGDCC4
HACD3
DPP8
RNU6-19P
VWA9
SLC24A1
DENND4A
RAB11A
SMAD6
SMAD3
C15orf61
IQCH-AS1
MAP2K5
SKOR1
FEM1B
ANP32A
ANP32A-IT1
GLCE
KIF23
RPLP1
MIR629
TLE3
UACA
LRRC49
THAP10
SENP8
MYO9A
PKM
CELF6
ADPGK
ADPGK-AS1
LOXL1
LOXL1-AS1
GOLGA6A
ISLR2
LOC283731
CYP11A1
LOC729739
SEMA7A
UBL7
UBL7-AS1
ARID3B
CLK3
CYP1A1
CYP1A2
CPLX3
ULK3
MIR6882
MPI
SCAMP2
FAM219B
COX5A
RPP25
SCAMP5
PPCDC
C15orf39
COMMD4
MAN2C1
NEIL1
MIR631
SNUPN
IMP3
SNX33
CSPG4
ODF3L1
DNM1P35
MIR4313
FBXO22
FBXO22-AS1
C15orf27
ETFA
ISL2
SCAPER
RCN2
TSPAN3
LINGO1
LINGO1-AS1
ACSBG1
CRABP1
IREB2
KIAA1024
ST20
MTHFS
ST20-MTHFS
ST20-AS1
ZFAND6
GOLGA2P10
LOC727751
GOLGA6L17P
RPS17
ACTG1P17
SCARNA15
SNHG21
FSD2
WHAMM
ZSCAN2
[truncated: 4,103 more rows]

## Sheet: Table S3
Supplementary Table 3 IBD signatures obtained from microarray analysis
a)												b)
Significant Genes Common to UC and CD												Ulcerative Colitis											Crohn's Disease
Upregulated						Downregulated						Exclusive Upregulated				Exclusive Downregulated				Exclusive Upregulated				Exclusive Downregulated
Gene	UC adj.P.Val	CD adj.P.Val	UC log2FC	CD log2FC		Gene	UC adj.P.Val	CD adj.P.Val	UC log2FC	CD log2FC		Gene	adj.P.Val	log2FC		Gene	adj.P.Val	log2FC		Gene	adj.P.Val	log2FC		Gene	adj.P.Val	log2FC
CFB	1.7589e-97	5.63384e-61	2.51178	2.3903		SLC26A2	1.28353e-78	4.09957e-14	-3.86843	-1.76513		TMEM165	1.62634e-55	0.866962		ATPAF1	9.45821e-58	-0.744286		HCP5	1.2502e-20	0.727267		VAV2	1.78171e-20	-0.642168
CXCL1	9.21043e-88	1.16718e-45	4.03172	3.43304		ACAT1	5.50695e-71	5.85959e-21	-1.37245	-0.85543		TMEM184B	3.84711e-53	0.738808		CNNM2	5.87467e-55	-1.02738		PLEKHF1	4.00612e-18	0.707513		MAOB	3.93387e-10	-0.721499
BACE2	3.56123e-85	4.16645e-49	1.43312	1.31646		SLC22A5	8.7458e-70	3.84842e-22	-1.9143	-1.24939		SEC13	4.01372e-52	0.636619		TMEM192	3.50933e-52	-0.70926		PSMB8	7.04161e-18	0.649661		TNNC2	1.13119e-08	-0.603023
DAPP1	3.19996e-84	1.27203e-47	1.90526	1.73037		ACSF2	1.78804e-69	1.39157e-17	-1.94843	-1.11425		ABCC1	4.03064e-51	0.83907		SEPHS2	3.82153e-52	-0.781532		APOL6	2.93037e-14	0.589968		BMX	5.72313e-07	-0.621563
TIMP1	2.50024e-82	6.71752e-31	2.68562	1.87781		PAQR5	4.12915e-69	4.89807e-23	-1.75309	-1.18116		CNN2	5.86747e-49	0.757858		PGAP3	5.80742e-52	-0.850343		GRIN3A	4.67172e-11	0.971225		SCGN	6.09922e-07	-0.589518
LCN2	6.10849e-82	1.87557e-45	3.6334	3.27087		PPP2R3A	5.75702e-68	4.37968e-18	-1.33509	-0.789304		MIF	2.2264e-48	0.791927		ZNF350	1.18627e-51	-0.749661		CXCR6	7.64763e-11	0.588227		BAMBI	1.66179e-06	-0.664034
C2	1.37499e-81	1.51448e-49	1.87988	1.80805		PADI2	2.59185e-66	1.68036e-15	-2.41356	-1.32789		SETD7	4.5705e-48	0.77353		AUH	4.53312e-51	-0.765721		RNF122	7.82398e-11	0.61206		SST	1.6935e-06	-0.828458
FUT8	3.47842e-81	6.73873e-23	1.48532	0.876726		TMEM38B	5.99624e-65	9.63888e-24	-1.21635	-0.874778		TMC6	1.52033e-47	0.619944		ZFP3	6.73497e-51	-0.791822		ISG15	1.05767e-09	0.626973		BMP5	8.81127e-06	-0.590965
SLC6A14	3.29744e-80	6.6919e-31	4.65499	3.33169		ABCB1	2.13153e-63	4.05943e-22	-2.42418	-1.70184		P4HB	1.31629e-46	0.645163		METTL7A	2.23033e-49	-1.17361		APIP	2.26108e-09	0.609019		DPP4	1.69968e-05	-0.583937
DUOXA2	4.05154e-80	6.15848e-34	3.87924	2.95093		PHLPP2	5.79297e-63	3.80142e-20	-1.92133	-1.28198		DNAJC10	1.55541e-45	0.810479		TMEM177	8.97702e-49	-0.725848		GSDMB	3.61544e-08	0.663102		OGN	0.000118547	-0.709321
LPCAT1	7.7461e-76	2.42035e-27	1.7335	1.20275		PDE6A	7.78875e-63	2.83021e-16	-1.9362	-1.14217		AGTRAP	5.89968e-45	0.615493		RNF135	1.84151e-48	-0.726284		HLA-DQB2	7.7324e-08	0.594763		GREM2	0.000587289	-0.610681
DUOX2	8.96954e-76	1.30745e-35	4.28105	3.51707		USP30	2.00709e-62	4.0775e-23	-1.0646	-0.776523		SLC38A5	6.74735e-45	0.856505		TESK2	4.03775e-48	-0.818091		CYP1B1	1.51155e-07	0.747654		HOXB13	0.012896	-0.765748
PI3	5.2102e-75	1.97802e-34	3.11622	2.52388		PCK1	2.70977e-62	8.35666e-17	-3.70264	-2.23965		MSI2	8.82159e-45	0.654174		DTX4	1.01934e-47	-0.762124		IL3RA	5.98952e-07	0.596741		INSL5	0.0195816	-0.881241
ARFGAP3	3.28292e-72	8.17745e-26	1.36323	0.94946		EIF4EBP2	6.44137e-62	4.81149e-26	-0.810929	-0.639605		PLOD1	1.14055e-44	0.711466		ZCCHC14	3.00166e-47	-0.797918		SLC1A3	2.09376e-06	0.613442
IFITM3	6.34595e-72	8.73754e-42	1.47672	1.39854		PXMP2	2.70425e-61	1.41294e-17	-1.34387	-0.84462		WDR54	2.41935e-44	0.703145		HNMT	4.51434e-47	-0.899377		LTB	2.63889e-06	0.640082
REG4	4.70417e-71	1.2844e-27	2.90633	2.1345		CLYBL	1.18594e-60	3.41439e-17	-1.29897	-0.812146		AFAP1L2	7.65943e-44	0.665448		SUOX	5.78568e-47	-0.709238		CLEC4D	2.78036e-06	0.637333
LPIN1	5.3718e-71	1.24164e-28	1.21635	0.914269		FGFR2	1.62173e-60	9.02235e-09	-1.67895	-0.708405		DPY19L1	7.94077e-43	0.831363		FCGRT	1.01067e-46	-0.859342		IFIT2	3.70669e-05	0.696363
APOL1	1.73232e-70	5.01401e-37	2.06976	1.84355		HMGCS2	2.12829e-60	1.36605e-11	-3.86001	-1.92307		PDIA5	9.17073e-43	0.684179		MRPL34	1.04642e-46	-0.692346		SCNN1G	0.00119051	0.755736
LYN	1.09317e-69	7.74141e-31	1.405	1.12212		AQP8	1.80021e-59	2.89142e-08	-4.63891	-1.91346		ACVR1	4.8334e-42	0.673367		ASTE1	1.18545e-46	-0.701441		MPEG1	0.00121981	0.592238
BHLHE40	1.27121e-69	7.21651e-21	1.33666	0.843524		RUNDC3B	6.26666e-59	2.19373e-17	-1.59512	-1.02548		DUSP7	8.98434e-42	0.840216		BTBD3	1.79778e-46	-0.822906		FAM3B	0.00134424	0.906462
CD55	1.39488e-69	5.90428e-21	2.02807	1.28414		CLDN8	2.51763e-58	7.32422e-19	-4.0999	-2.78483		ARHGEF3	2.1364e-41	0.882207		HSDL2	4.10442e-46	-0.870805		CLC	0.00135275	0.682684
CDC25B	1.66303e-69	4.54786e-34	1.28849	1.10019		DHRS11	3.00469e-58	2.06242e-12	-2.09639	-1.1159		ENO1	1.49817e-40	0.645332		AFG3L2	5.24968e-46	-0.844048		IL11	0.00372719	0.635819
KCND3	2.0118e-68	1.81153e-34	2.05721	1.79297		ZNF91	4.33585e-58	8.434e-22	-1.23447	-0.916772		MCFD2	4.59692e-40	0.714503		MAST2	1.03241e-45	-0.835035		VIP	0.014547	0.705426
ZC3H12A	8.35096e-68	7.11867e-33	1.6712	1.41954		PDK2	2.42784e-57	9.45103e-20	-1.2667	-0.895201		CCDC167	5.03143e-40	0.732909		GLTP	1.73242e-45	-0.777979
CDH3	3.88016e-67	1.56871e-13	2.77882	1.40023		PPARGC1A	4.39786e-57	7.95849e-12	-1.81073	-0.951259		HYOU1	2.64638e-39	0.640176		CDK20	2.07738e-45	-0.784916
C4BPB	1.59569e-66	2.62935e-28	2.48216	1.94926		RHOU	5.09133e-57	3.35677e-14	-1.52115	-0.890617		PGM3	8.3061e-39	0.793007		TRAK2	5.35041e-45	-0.694422
HIF1A	3.23753e-66	1.37553e-28	1.21871	0.966288		UGT2A3	1.35764e-56	8.39458e-14	-3.31583	-1.92005		TNFRSF10B	1.02204e-38	0.727367		DGKD	1.1355e-44	-0.718815
KYNU	7.3794e-66	1.35256e-23	2.86979	2.03466		PLCD1	1.92425e-56	1.08505e-13	-1.25661	-0.725645		TRIB1	6.07122e-38	0.768303		C6orf136	1.50465e-44	-0.79632
IFITM2	1.29078e-65	8.09003e-33	1.65669	1.44042		TMEM170A	2.69111e-56	1.56482e-19	-0.951745	-0.677218		LIMS1	1.0569e-37	0.675997		ADD3	2.25873e-44	-0.725226
S100A11	3.30574e-65	2.76492e-20	1.28812	0.840336		ZDHHC23	2.95853e-56	1.36251e-16	-1.03004	-0.666592		AHR	1.06469e-37	0.821091		ACVR2A	2.85601e-44	-0.867981
ANXA1	4.90835e-65	2.07751e-15	2.49757	1.38972		SLC35G1	2.98252e-56	3.36732e-17	-1.416	-0.935902		ZNFX1	1.33828e-37	0.599548		PCK2	6.92965e-44	-0.857718
SERPINA1	4.86204e-64	2.27432e-30	1.48368	1.25177		TSPAN7	5.26796e-56	5.81264e-14	-1.50072	-0.881676		CLDN2	1.49751e-37	0.944204		FAHD1	1.25293e-43	-0.869529
KDELR3	8.90563e-64	7.3141e-22	1.46697	1.01804		ETFDH	6.85402e-56	1.17953e-16	-1.28457	-0.837115		CBFB	2.22481e-37	0.687091		PGM1	1.43484e-43	-0.801989
TCN1	2.09357e-63	1.51494e-13	3.25247	1.71218		CPT1A	8.5962e-56	1.12156e-13	-1.04922	-0.61074		SEC22C	2.29304e-37	0.765464		ANO10	1.92488e-43	-0.708364
PITPNC1	2.44298e-63	1.15644e-15	1.33325	0.763945		AIFM3	1.46342e-55	1.26927e-12	-1.24038	-0.690097		DNAJB11	5.09208e-37	0.711485		TPRG1L	2.23745e-43	-0.714181
CREB3L2	3.91833e-63	2.91095e-23	1.20938	0.877772		ABCG2	3.10922e-55	2.35362e-20	-3.23421	-2.39153		VCP	6.61162e-37	0.597463		SNX13	3.24379e-43	-0.797571
CD44	3.95675e-63	6.42285e-25	1.46914	1.11159		ACADS	4.61971e-55	1.24259e-11	-1.13097	-0.604234		HIVEP2	1.38308e-36	0.797021		MPND	3.40236e-43	-0.814586
SAMD9L	5.55882e-63	1.78092e-39	1.60876	1.62802		ENTPD5	6.37128e-55	1.91127e-12	-1.73634	-0.96638		SMOX	1.85409e-36	0.947906		PTPN21	3.4777e-43	-0.830381
GNA15	1.5553e-62	6.36113e-20	1.57632	1.0503		SLC19A3	3.39756e-54	3.02128e-28	-1.20747	-1.10191		TRIM29	2.54446e-36	1.41647		AK3	3.78028e-43	-0.696588
NFKBIZ	3.28257e-62	8.13599e-29	1.37496	1.14865		EXPH5	4.15835e-54	5.39581e-11	-1.90662	-0.997891		NT5DC2	3.24699e-36	0.88769		DENND4C	4.5071e-43	-0.668964
S100A8	5.98708e-62	3.0553e-31	4.38715	3.86631		BCAT2	8.36064e-54	4.01117e-17	-0.872049	-0.593508		ERLEC1	3.93272e-36	0.623254		OAF	5.13619e-43	-0.784892
TGM2	3.36666e-61	6.44251e-28	2.10264	1.7433		ARHGAP44	1.30844e-53	2.75167e-13	-1.39072	-0.818607		DCPS	5.20033e-36	0.599788		TP53TG1	1.7617e-42	-0.786994
CXCL2	3.89254e-61	5.3507e-24	2.73154	2.06997		NMT2	1.5759e-53	5.90428e-21	-0.863863	-0.664763		PAPSS1	7.77045e-36	0.640633		SULT1A1	1.90775e-42	-0.979933
BIRC3	1.05722e-60	3.22855e-33	1.79633	1.67012		PHYH	7.54505e-53	1.0781e-18	-1.14179	-0.828578		SSR4	1.72975e-35	0.69101		ACVR1C	3.23785e-42	-1.33097
MMP7	2.26986e-60	5.84634e-21	3.40158	2.39943		ME3	1.0379e-52	9.6678e-22	-0.910775	-0.724087		AKIRIN2	2.60126e-35	0.697327		SLC35F2	5.20717e-42	-0.637535
SEC24D	1.33851e-59	2.3316e-22	1.14966	0.850766		C7orf31	1.25414e-52	1.94706e-13	-1.17223	-0.703753		RPL39L	4.11288e-35	0.645236		EAPP	1.08464e-41	-0.725511
ASPHD2	1.36549e-59	4.4749e-22	1.25279	0.919985		ACOX1	2.30845e-52	7.77237e-13	-1.35314	-0.793226		PMEPA1	4.23239e-35	1.00554		MAGI1	1.19083e-41	-0.768981
IFITM1	4.17442e-59	7.87985e-33	1.33635	1.25657		ZNF704	2.59167e-52	1.73009e-16	-1.19322	-0.81044		SSR1	4.68056e-35	0.617797		KLHL8	1.21584e-41	-0.726417
ANXA5	7.88561e-59	7.8836e-24	1.2486	0.968902		MT1M	2.85899e-52	4.94148e-16	-2.69669	-1.80258		TNFRSF12A	5.55202e-35	0.958939		MGAT4B	1.49546e-41	-0.785871
S100P	7.91284e-59	1.78595e-29	2.0896	1.84361		CHPT1	3.31073e-52	4.93281e-17	-0.990932	-0.686926		SEC24A	6.31182e-35	0.590631		ACOT13	2.18197e-41	-0.815636
PDIA4	9.0676e-59	1.4511e-20	0.939134	0.667688		ABAT	5.6534e-52	5.74539e-16	-1.1372	-0.761397		SLC9A7	1.44568e-34	0.889212		ACOT8	5.05248e-41	-0.729992
CD74	1.02718e-58	1.9162e-35	1.64855	1.64051		MT1F	5.95656e-52	4.76496e-16	-1.77057	-1.18962		MAP3K5	2.73546e-34	0.650504		OXR1	5.34325e-41	-0.736259
SERPINB5	2.28585e-58	1.46028e-10	2.84428	1.37549		ADH1A	1.09768e-51	2.46238e-12	-1.22023	-0.705358		GMPR	5.89244e-34	0.837021		PEX11A	6.12725e-41	-0.874107
PSMB9	2.53637e-58	1.78092e-39	1.48378	1.58844		ACADM	1.80556e-51	8.00151e-16	-1.02438	-0.686775		ANXA3	6.13839e-34	0.952174		LCMT1	7.10107e-41	-0.601354
HLA-DMA	3.00469e-58	4.54786e-34	1.76743	1.72374		CNKSR3	1.83508e-51	6.88251e-24	-1.27032	-1.08754		BTN2A2	7.95467e-34	0.605202		LYRM7	9.16009e-41	-0.665843
NOS2	3.72904e-58	1.41861e-29	2.7044	2.41198		NHEJ1	2.12002e-51	7.91838e-17	-1.02563	-0.713923		TM4SF1	9.12592e-34	1.26529		FASTKD1	2.81555e-40	-0.704173
VNN1	8.35933e-58	8.5103e-19	3.46862	2.36716		ANKH	3.23253e-51	2.43722e-20	-0.889472	-0.693489		PGD	1.08543e-33	0.58943		ARV1	3.03385e-40	-0.664844
CRELD2	2.00069e-57	2.96411e-26	1.06964	0.896078		NAAA	4.08441e-51	2.90271e-13	-1.45539	-0.88511		PPA1	4.11693e-33	0.58667		MYLIP	3.64035e-40	-0.741116
XBP1	3.11879e-57	1.07143e-24	1.22183	0.988483		OSBPL1A	4.2641e-51	3.13849e-19	-1.06857	-0.807619		TRAM2	4.15703e-33	0.676275		IFT57	4.17123e-40	-0.663971
TNIP3	4.31846e-57	5.29983e-23	3.65119	2.83478		VLDLR	4.32794e-51	1.10086e-25	-1.56669	-1.40778		PDP1	5.65379e-33	0.974652		VDR	8.30761e-40	-0.797227
TBXAS1	6.39806e-57	2.67264e-17	1.05253	0.692116		NAALADL1	5.9243e-51	2.79624e-23	-1.07399	-0.911605		EIF5A2	5.76046e-33	0.870902		RAB40B	1.08187e-39	-0.749036
CASP1	1.72266e-56	2.04611e-37	1.54564	1.63771		MYO1D	1.72888e-50	4.2807e-12	-1.07058	-0.62195		ITGAV	5.78064e-33	0.695922		MOCS1	1.14607e-39	-0.814028
ASRGL1	2.43975e-56	5.9097e-22	1.25779	0.959234		ASB13	1.78801e-50	3.83951e-19	-0.936419	-0.711882		ANXA2	5.86796e-33	0.615016		EPB41L1	1.3162e-39	-0.706352
IDO1	2.53995e-56	7.49197e-34	3.6399	3.61945		CHP2	2.13547e-50	5.05688e-08	-2.60119	-1.18707		FNDC3B	6.60127e-33	0.61769		CDKL1	1.41786e-39	-0.755756
CYP4X1	4.75612e-56	6.14888e-19	1.56442	1.09688		PRDX6	4.9053e-50	4.30303e-12	-1.15435	-0.67478		PHLDA2	7.29198e-33	0.863418		NUDT7	1.69054e-39	-0.884471
REG1A	5.31131e-56	5.03523e-33	4.95362	4.86797		TRPM6	5.48263e-50	3.49386e-09	-2.77435	-1.38085		PRSS22	1.12244e-32	0.748449		MIER1	2.14597e-39	-0.666312
LIPG	7.55038e-56	2.16434e-24	1.32851	1.08634		CWH43	1.34898e-49	1.26614e-06	-2.44936	-1.00746		MAD2L2	1.15749e-32	0.62716		DUSP16	2.41119e-39	-0.66376
FKBP11	8.83415e-56	3.41251e-23	1.54974	1.23042		FAM162A	1.45519e-49	7.80945e-12	-1.05229	-0.611587		ARMCX3	2.04574e-32	0.59592		GAB1	2.7934e-39	-0.765248
DUSP10	1.12992e-55	4.36622e-18	0.966784	0.663263		SEMA5A	7.20515e-49	2.01425e-10	-1.19248	-0.649668		RPL22L1	2.38286e-32	0.77296		MKRN1	4.23731e-39	-0.679921
NUCB2	1.20902e-55	2.16434e-24	1.11	0.91012		SELENBP1	1.23462e-48	3.15694e-05	-1.73712	-0.626555		HSPA5	2.57655e-32	0.626602		AKAP1	4.80651e-39	-0.885569
CFI	1.50653e-55	5.36465e-26	2.24199	1.91274		EPHX2	2.90719e-48	8.12907e-10	-1.40434	-0.744842		TUBB2A	2.76972e-32	0.790418		SLC25A23	5.14334e-39	-0.912466
SLFN5	1.54687e-55	8.00301e-22	1.41736	1.08855		CDKN2B	5.00357e-48	1.35847e-13	-1.72708	-1.11322		SESTD1	3.64703e-32	0.71661		NIPSNAP3A	5.31776e-39	-0.863162
DRAM1	1.82708e-55	7.07473e-30	1.57059	1.45956		TMEM98	6.67824e-48	1.67872e-16	-0.944556	-0.682621		COTL1	3.74817e-32	0.730476		CTSA	5.54407e-39	-0.737426
HM13	2.23466e-55	1.69557e-25	0.707577	0.597873		P2RY1	9.90156e-48	5.38997e-09	-1.24169	-0.630013		PFKP	4.85194e-32	0.718888		SPR	6.99748e-39	-0.665163
PARP9	2.76937e-55	6.9569e-33	1.2378	1.22461		CHKA	1.56471e-47	3.34691e-16	-0.836556	-0.601274		FXYD5	1.04377e-31	0.977474		OCRL	7.29306e-39	-0.624132
IRAK3	1.50955e-54	5.14528e-22	1.68121	1.31493		SLC36A1	1.99522e-47	9.65722e-13	-1.11273	-0.695939		IDH2	1.04712e-31	0.654228		SOS2	8.3061e-39	-0.606934
TRIM22	1.90628e-54	9.01384e-31	1.77232	1.6998		ANK3	2.00008e-47	2.91922e-17	-1.22198	-0.913005		SLC17A9	1.15086e-31	0.668497		IGSF9	1.01996e-38	-1.16533
DDIT4	2.25752e-54	1.24521e-17	1.41141	0.970282		CTDSPL	2.93782e-47	4.0352e-16	-0.880189	-0.633337		CYB5R2	2.73032e-31	0.686984		HMGA2	1.38181e-38	-0.826736
RPS6KA2	7.72877e-54	4.76496e-16	1.02623	0.672155		ALDH18A1	3.45984e-47	3.70413e-19	-0.825888	-0.658153		SWAP70	3.41736e-31	0.774268		ZNF608	1.81582e-38	-0.643779
OLFM4	8.85931e-54	9.59587e-31	2.39219	2.3127		MT1H	5.78568e-47	3.85957e-11	-1.67487	-0.975366		MYCBP2	6.49811e-31	0.749847		ALDH5A1	2.06114e-38	-0.804238
TTYH3	1.55052e-53	2.85531e-18	0.842127	0.597692		IMPA2	5.81069e-47	3.52655e-14	-0.902214	-0.60525		NBEAL2	1.0719e-30	0.58032		CAT	2.37517e-38	-0.684031
PARP14	1.75378e-53	2.92584e-30	1.12521	1.08131		CDHR1	9.26477e-47	2.84863e-14	-1.77168	-1.19677		ZHX2	1.83571e-30	0.685235		FGFR3	3.72785e-38	-1.02092
ME1	1.75378e-53	1.59211e-14	1.61513	1.00353		FMO4	1.24985e-46	3.04324e-10	-1.08106	-0.602227		TGFBR2	2.12256e-30	0.787894		BSG	6.1853e-38	-0.932241
APOL2	4.85651e-53	5.67469e-32	1.06806	1.0686		RPS6KA6	2.46602e-46	2.15798e-13	-1.31155	-0.85862		PLK2	2.88536e-30	0.949476		ECH1	6.1853e-38	-0.734506
ARPC1B	7.40634e-53	1.34586e-19	0.791374	0.590402		VSIG10	3.28662e-46	5.79367e-16	-1.10821	-0.804884		CTSB	4.08676e-30	0.641359		MEST	6.24915e-38	-0.759886
BTN3A1	8.78295e-53	1.65645e-34	0.864117	0.913423		DEPDC7	5.51515e-46	3.95346e-25	-1.16086	-1.10759		SSR3	1.31205e-29	0.592264		ABCD3	8.11715e-38	-0.822037
IL1RN	1.39218e-52	5.40308e-17	2.7098	1.8662		ADH1C	7.39076e-46	4.31186e-05	-2.55269	-0.94257		CXCL16	1.38728e-29	0.673586		CPT2	1.13083e-37	-0.809078
PARP8	1.64594e-52	3.14493e-19	1.38436	1.02609		SLC16A1	8.22056e-46	3.1119e-16	-1.73835	-1.2831		ZYX	1.68528e-29	0.674674		ARHGEF9	1.26106e-37	-0.763896
SGMS1	2.81319e-52	6.83828e-14	1.10831	0.682028		ZNF57	1.09956e-45	1.08772e-11	-0.958734	-0.585307		UBE2J1	2.84819e-29	0.623115		CA12	1.26519e-37	-1.02918
LPGAT1	3.11412e-52	1.88867e-16	0.989817	0.672176		PKIB	3.11517e-45	3.23681e-07	-1.67275	-0.771926		CCL24	3.06993e-29	1.00084		TRAF3IP2	1.32719e-37	-0.601806
CALU	4.95257e-52	6.4723e-16	1.01659	0.678698		GHR	3.2312e-45	1.92156e-15	-1.76713	-1.27769		QSOX1	3.32145e-29	0.785505		ZNF124	2.94073e-37	-0.789996
PLS3	1.50142e-51	6.6647e-12	1.13116	0.641765		PRR15	3.23327e-45	9.94185e-09	-1.34667	-0.69674		SEMA4D	4.97446e-29	0.847113		PMM1	2.97818e-37	-0.798659
F3	1.8895e-51	8.37932e-11	1.35942	0.729851		RAVER2	4.91131e-45	3.69969e-13	-1.29567	-0.855708		ASPH	5.23098e-29	0.690373		AKAP9	3.35525e-37	-0.827029
SLC7A11	4.28456e-51	6.16758e-13	1.73445	1.03937		HSD17B2	7.05301e-45	1.7876e-22	-1.67591	-1.52045		RFX5	9.40915e-29	0.644605		HOXA5	3.39297e-37	-1.05973
PIM3	1.17742e-50	1.01625e-25	0.886568	0.802088		CAMK2N1	8.41044e-45	2.94599e-14	-1.13178	-0.786669		TPST2	1.27276e-28	0.746925		NDRG2	3.48772e-37	-0.938672
PSME2	1.39718e-50	6.15848e-34	0.923399	0.993331		UGDH	1.16454e-44	1.44842e-11	-1.02821	-0.633435		SH3PXD2B	1.32947e-28	0.802034		SLC44A1	3.7113e-37	-0.759983
CHI3L1	2.87635e-50	3.62503e-26	3.64944	3.35584		PDCD4	1.60416e-44	2.28549e-10	-1.20085	-0.695338		KPNA2	1.48178e-28	0.686416		PLXNA2	5.86816e-37	-0.754822
MMP3	3.12146e-50	3.98214e-26	4.38148	4.02695		PBLD	2.36459e-44	2.33197e-05	-1.75873	-0.686315		CLDN12	1.52949e-28	0.784758		CAMK1D	6.68333e-37	-0.849699
SOCS3	3.12146e-50	7.58012e-24	2.43274	2.11596		MTMR11	3.39136e-44	7.85281e-11	-1.18859	-0.709721		CD81	2.43486e-28	0.769191		CPNE2	9.12319e-37	-0.7265
MMP12	3.62627e-50	1.78171e-20	3.14269	2.49672		VIPR1	3.39136e-44	2.99144e-08	-1.45711	-0.740216		LAMB2	2.7638e-28	0.851037		RAB4A	1.20426e-36	-0.654176
GPX8	3.78866e-50	5.20458e-23	1.37834	1.17447		IP6K2	8.50377e-44	5.27486e-16	-0.797197	-0.601454		ITGA2	2.88699e-28	1.10071		LPCAT3	1.49325e-36	-0.815673
CARD6	4.28962e-50	4.88979e-16	1.74461	1.20196		SULT1A2	8.65323e-44	6.44259e-12	-1.35706	-0.862154		MAP3K6	3.25209e-28	0.649027		GPR39	1.65756e-36	-0.898338
ADAM9	1.42188e-49	1.49938e-19	0.950618	0.740869		HSD17B11	1.03701e-43	2.48013e-12	-0.962559	-0.624368		PRPS1	3.32645e-28	0.683007		CYP27A1	2.49869e-36	-0.945183
PODXL	1.77e-49	2.17008e-14	1.12628	0.735138		AHCYL2	1.12667e-43	1.34214e-13	-1.25689	-0.864722		GRB10	4.71605e-28	0.762618		CLCN2	3.41155e-36	-1.06337
REG3A	2.04695e-49	2.21764e-33	4.48196	4.84691		EPB41L4B	1.13114e-43	1.12856e-10	-1.19298	-0.711723		LMCD1	4.80491e-28	0.86508		BDH1	3.7436e-36	-1.0037
MYEOV	2.23033e-49	3.21052e-16	1.32514	0.928373		PDE8A	1.73751e-43	5.88391e-15	-0.870953	-0.634864		ALOX5	8.69647e-28	1.17636		TRIM36	3.79143e-36	-1.03915
CASP4	3.64593e-49	3.42684e-14	1.21005	0.786893		PLCE1	2.24017e-43	2.3987e-09	-1.23348	-0.683713		KIAA0930	1.08557e-27	0.582102		PPM1A	4.38431e-36	-0.634403
OAS2	3.96893e-49	7.50405e-21	1.39864	1.13951		CAPN13	2.89338e-43	1.40848e-16	-1.7902	-1.39034		ITGA6	1.24516e-27	0.63068		ACADSB	4.46178e-36	-0.885826
TCIRG1	4.43184e-49	9.43704e-27	0.752333	0.712587		PRKG2	4.46411e-43	1.34178e-13	-1.43165	-0.994172		CMTM7	1.24906e-27	0.738754		SUCLG1	4.93264e-36	-0.728607
ADM	5.1823e-49	7.19511e-21	1.56717	1.27982		LIPC	4.91337e-43	1.41004e-17	-0.992004	-0.800309		EMB	1.4916e-27	1.14374		TBC1D12	6.24039e-36	-0.592322
LRP8	8.39994e-49	4.47887e-13	1.00463	0.625516		CCNJL	5.78577e-43	1.76162e-13	-0.985179	-0.681588		SRM	1.6589e-27	0.632069		LETM1	6.59608e-36	-0.704573
STOM	1.23462e-48	5.70311e-21	1.5299	1.26016		PPARG	6.69116e-43	3.56348e-09	-1.27962	-0.706682		CHSY1	1.67068e-27	0.776545		LIAS	6.78036e-36	-0.714754
JAK2	1.89813e-48	3.00843e-28	0.900616	0.889342		PSD3	6.70858e-43	2.35749e-12	-1.05275	-0.692345		APH1B	1.70068e-27	0.62748		GPR160	7.11181e-36	-0.972606
IFI16	3.42844e-48	1.89207e-17	1.44966	1.07799		PTGDR	9.23346e-43	3.23328e-10	-1.43187	-0.844619		STX2	1.97692e-27	0.740039		C1orf115	8.57337e-36	-0.881955
DUSP6	3.61075e-48	6.09841e-21	0.917551	0.759847		METTL7B	1.32819e-42	2.11803e-09	-1.26498	-0.712166		IFNAR2	2.10892e-27	0.700909		IFT74	1.00173e-35	-0.82441
PFKFB3	4.62863e-48	1.143e-12	1.66104	1.02562		MT1G	1.82977e-42	4.97343e-11	-1.69916	-1.05339		BAG2	2.10892e-27	0.929607		BDH2	1.00173e-35	-0.723578
SPCS3	5.0086e-48	2.64615e-20	0.917565	0.747297		TDP2	1.84668e-42	1.6506e-10	-1.13936	-0.686467		AZGP1	2.75078e-27	1.29594		IQGAP2	1.41264e-35	-0.89027
PHLDA1	6.2865e-48	1.47898e-09	1.81304	0.951111		PAG1	1.86519e-42	1.05144e-15	-1.02322	-0.779578		FGD5	3.24566e-27	0.72536		TSHZ1	1.42029e-35	-0.68276
IL1B	6.67321e-48	9.20148e-24	2.96646	2.65978		SLC16A9	2.16166e-42	6.34246e-19	-2.19916	-1.87135		LDHB	4.49768e-27	0.629447		PDHA1	1.43457e-35	-0.668851
RNF213	1.01508e-47	8.25212e-21	1.11038	0.921901		NAT8B	3.10071e-42	5.89863e-19	-1.22601	-1.04702		ST3GAL5	6.50926e-27	0.744071		C2orf88	1.62852e-35	-1.22296
RCN1	1.0408e-47	5.34961e-25	0.786334	0.729237		MIER3	4.79866e-42	1.45075e-07	-1.21466	-0.605905		PRAF2	8.84229e-27	0.67331		HADHA	1.67506e-35	-0.618161
UBE2L6	1.10725e-47	1.88686e-33	1.1613	1.28933		AQP11	5.74669e-42	2.92048e-17	-1.07566	-0.873155		SDF2L1	1.00267e-26	0.695443		TRAPPC6A	1.68551e-35	-0.58666
PTPN13	1.56092e-47	6.4026e-25	1.06921	0.992189		GBA3	8.59194e-42	1.16596e-06	-2.09431	-0.971361		SERPINB6	1.39887e-26	0.631525		CA2	1.77229e-35	-1.54011
SPNS2	2.05141e-47	9.32658e-18	1.22087	0.927592		CROT	1.23076e-41	4.35354e-09	-1.04168	-0.58358		SLC41A1	2.06742e-26	0.697484		CHCHD10	2.3631e-35	-0.649473
RILPL2	2.20202e-47	1.89643e-19	1.20792	0.968333		SLC17A4	1.66629e-41	3.84059e-09	-1.86193	-1.04895		ERRFI1	2.44493e-26	0.869492		SFXN1	2.56564e-35	-0.659858
TGFBI	1.05977e-46	5.82632e-16	1.79294	1.29255		MAOA	3.59668e-41	1.07607e-05	-1.37389	-0.584939		CFLAR	4.05666e-26	0.618476		TMEM80	3.00024e-35	-0.582386
SLC28A3	1.19393e-46	1.22581e-09	1.38253	0.742678		PIGZ	3.78229e-41	4.22746e-08	-1.58424	-0.834932		PMAIP1	4.75231e-26	0.795979		RNF138	3.7882e-35	-0.654368
GABRP	1.36489e-46	9.21586e-14	1.48523	0.984833		SGK2	4.53597e-41	2.80303e-09	-1.29018	-0.738445		SLC6A20	5.33661e-26	1.09891		PANK3	3.94958e-35	-0.77089
ZBP1	1.42706e-46	7.19511e-21	1.38819	1.17431		CES2	5.96096e-41	1.67452e-12	-1.2416	-0.847843		GRHL1	1.07855e-25	0.807738		MKKS	4.14881e-35	-0.614246
TMEM92	1.42706e-46	4.97692e-15	1.06037	0.739799		DPP10	7.62123e-41	3.22119e-13	-1.56583	-1.10716		CPEB4	1.33962e-25	0.749954		IYD	4.4052e-35	-0.877447
TRIB2	1.49141e-46	3.62482e-11	1.57737	0.9255		SLC39A5	1.41166e-40	4.93612e-08	-1.34755	-0.713101		ETS1	1.45268e-25	0.853782		AGFG2	4.80583e-35	-0.661626
C4BPA	1.61656e-46	7.18636e-19	2.50944	2.00155		SUCLG2	1.43882e-40	2.37133e-11	-0.942314	-0.612128		ATP11A	2.33313e-25	0.75435		CHAD	7.50937e-35	-0.941612
SEC14L1	3.06367e-46	1.76918e-15	1.0425	0.743329		TUBAL3	3.04509e-40	2.68273e-09	-1.63589	-0.950096		ANP32E	2.44938e-25	0.619433		HMGCL	1.33953e-34	-0.6324
STAT1	5.12596e-46	2.77576e-32	1.22689	1.36327		SLC25A20	3.2971e-40	2.90271e-13	-0.875006	-0.626468		DUSP14	2.68232e-25	0.664059		RNF125	2.05556e-34	-0.815128
BTN3A3	6.98594e-46	1.11272e-30	1.03572	1.11684		SAMD13	3.48972e-40	3.5462e-12	-1.21727	-0.828877		HSPA13	3.27261e-25	0.811848		TRPM4	2.07392e-34	-0.842317
SP110	7.34445e-46	1.10194e-18	1.02254	0.81872		BMP3	5.84372e-40	3.44337e-08	-1.72991	-0.935614		CCDC69	4.18586e-25	0.988102		ME2	3.12441e-34	-0.625544
MANF	7.6439e-46	4.01449e-16	0.791982	0.58196		CNGA1	5.88413e-40	2.03632e-13	-0.984706	-0.712829		SERPINB1	5.94143e-25	0.663838		TMEM9B	3.44388e-34	-0.598403
NCOA7	1.03974e-45	3.002e-22	1.12694	1.00366		RMND5A	6.38909e-40	2.05173e-13	-0.97336	-0.70492		CDC42EP2	6.776e-25	0.639954		GJB1	3.51729e-34	-0.676184
IL15RA	1.54804e-45	8.30967e-24	0.689777	0.641163		SLC38A4	8.05368e-40	3.95639e-09	-2.15215	-1.24498		DEGS1	7.05082e-25	0.7277		NDUFA5	3.72338e-34	-0.640496
TPK1	1.72664e-45	2.22131e-20	1.25709	1.06532		CNTN3	1.0074e-39	5.74603e-08	-1.87586	-1.00176		NQO2	8.32076e-25	0.791429		PEX26	3.96678e-34	-0.835275
BAG3	1.90983e-45	1.47013e-21	0.81788	0.717298		SLC30A10	2.83362e-39	3.50084e-09	-2.12003	-1.24191		FBXW7	9.37036e-25	0.617186		SLC20A2	4.86863e-34	-0.891744
CD82	2.04541e-45	2.95489e-17	1.03687	0.797802		STRADB	4.16349e-39	2.88618e-13	-0.946601	-0.690402		SLC25A37	9.52956e-25	0.749608		COQ9	6.22453e-34	-0.619169
IFI6	2.75608e-45	9.02771e-22	1.36863	1.21022		EFNA1	4.67112e-39	1.71091e-14	-1.21327	-0.932822		SLC1A4	9.72586e-25	0.64045		ZNF575	7.52028e-34	-0.848191
GRINA	3.14592e-45	5.80561e-26	0.739404	0.727531		DDAH2	7.60733e-39	5.38887e-13	-0.871994	-0.630837		TMEM204	1.06039e-24	0.860223		ZSWIM3	8.81687e-34	-0.6385
CXCL3	4.533e-45	6.78727e-17	1.91724	1.46462		DDC	1.0038e-38	1.13507e-08	-1.14941	-0.656662		OSBPL8	1.39933e-24	0.657207		ADCY9	1.15776e-33	-0.645045
RBPMS	5.00649e-45	1.07409e-08	1.44909	0.750022		LEAP2	1.17153e-38	5.36241e-20	-1.06957	-0.998922		SLC39A6	2.12481e-24	0.684809		COX5B	1.20087e-33	-0.636704
GALNT2	6.25448e-45	1.37682e-18	0.722495	0.584841		MCOLN2	2.18635e-38	8.51601e-08	-1.46284	-0.788936		CEP128	2.20211e-24	0.946891		GPD1L	1.98777e-33	-1.00045
MMP1	6.64649e-45	6.61611e-25	3.99502	3.85227		EDN1	2.38726e-38	1.2619e-18	-1.04385	-0.940037		ECT2	2.44488e-24	0.669128		MPP7	1.99321e-33	-0.997321
PCSK1	7.55232e-45	5.6742e-21	2.27102	1.97803		FRMD1	8.02257e-38	4.36055e-08	-1.0974	-0.610632		SLC16A4	2.86026e-24	1.10592		OVOL2	2.48745e-33	-0.680742
ENC1	7.93856e-45	4.76095e-16	0.781655	0.581621		GUCA2B	1.06705e-37	1.00246e-06	-2.28264	-1.14		CD68	3.02164e-24	0.620617		LRP6	3.09762e-33	-0.659014
FADS1	9.66024e-45	3.34537e-20	1.35405	1.15426		CDC14A	2.42167e-37	2.03566e-10	-0.93638	-0.61081		LMO4	3.05163e-24	0.627187		SDHD	3.25793e-33	-0.694581
EPHA2	1.062e-44	9.91593e-13	1.18422	0.77084		CKB	2.42167e-37	1.5142e-09	-1.90888	-1.1826		GNAI2	3.05249e-24	0.761237		LRPPRC	3.30597e-33	-0.59523
MTHFD2	3.39136e-44	2.33082e-16	0.937858	0.712651		CNTFR	3.09437e-37	1.04845e-08	-1.01509	-0.596412		PTPRM	4.06126e-24	0.976687		CYCS	3.34828e-33	-0.652673
LYZ	4.78467e-44	4.68248e-23	1.66338	1.55141		BEST2	3.3065e-37	0.000750389	-1.83495	-0.648657		MAP4K1	7.07608e-24	0.714186		MTM1	3.45834e-33	-0.859083
ABCA12	5.0249e-44	2.93265e-06	2.31351	0.997744		RAPGEFL1	3.49973e-37	2.44368e-06	-1.22141	-0.593574		MAP4K4	1.46425e-23	0.604973		ZKSCAN1	4.44461e-33	-0.600116
CD40	5.33116e-44	1.01625e-25	0.931832	0.928785		SLC22A23	3.66049e-37	5.51552e-10	-0.990956	-0.632575		ANLN	1.68014e-23	0.753856		BPHL	6.42185e-33	-0.616227
PRDX4	6.35494e-44	1.27957e-14	0.864491	0.617867		ARHGEF37	3.8496e-37	4.20258e-15	-0.824142	-0.670363		FEZ1	2.20865e-23	0.773435		HEATR5A	6.58332e-33	-0.612345
GLRX	1.03841e-43	2.52777e-18	0.901017	0.737141		GXYLT2	6.23651e-37	1.99678e-13	-1.4549	-1.10924		HOMER1	3.36592e-23	0.698086		THRA	1.48228e-32	-0.607539
PRDM1	3.13289e-43	4.6912e-17	1.3158	1.03954		SLC4A4	6.8048e-37	3.33078e-05	-1.58537	-0.686037		LYST	3.46518e-23	0.604844		ASAP3	1.49241e-32	-0.692906
CEBPD	3.24379e-43	5.91438e-18	0.838856	0.683448		TMCC3	7.0923e-37	1.53746e-09	-0.979242	-0.611358		NR4A2	3.47767e-23	1.20686		CITED2	2.24345e-32	-0.698706
UNC5CL	3.24379e-43	1.60784e-14	1.20743	0.86906		RETSAT	8.70175e-37	6.57116e-10	-0.987936	-0.631882		LDLR	4.03769e-23	0.645894		MPST	2.56566e-32	-0.634822
PDZK1IP1	4.89312e-43	1.13037e-11	1.68777	1.07193		SSTR1	1.39853e-36	3.5055e-13	-0.942633	-0.71516		ELK3	4.48536e-23	0.93483		FAM117B	2.61203e-32	-0.616541
CCL20	6.5011e-43	2.96711e-21	2.08163	1.88229		SCUBE2	1.68953e-36	3.10576e-06	-1.39024	-0.676888		E2F5	4.90934e-23	0.60726		UGP2	5.2009e-32	-0.872542
RAC2	7.94077e-43	2.88838e-15	1.45443	1.0836		MT1E	3.99632e-36	5.26885e-11	-1.17195	-0.806798		ODC1	7.65239e-23	0.667072		GNA11	5.435e-32	-0.826691
VWF	1.03614e-42	6.40219e-20	1.8654	1.6272		SATB2	4.81108e-36	3.16785e-05	-1.36703	-0.602125		RECQL	7.69903e-23	0.625255		ZSWIM5	5.81217e-32	-0.722176
PML	1.13888e-42	2.11307e-19	0.756873	0.650622		ENDOD1	6.78146e-36	1.96956e-12	-0.954742	-0.708381		HHEX	8.10963e-23	0.8547		SPHK2	6.19712e-32	-0.614932
SRD5A3	1.22364e-42	8.11925e-08	1.35997	0.685412		FMO5	4.48237e-35	1.34047e-09	-1.33882	-0.86659		CTSC	1.11503e-22	0.597366		OVOL1	7.85719e-32	-0.75325
CTSH	1.34498e-42	1.03057e-14	1.34538	0.985264		CYP4F12	4.93822e-35	4.10399e-09	-1.09741	-0.689378		LATS2	1.30343e-22	0.665732		XK	9.6525e-32	-0.954634
TPM4	1.92645e-42	5.92325e-16	0.791809	0.608935		FLVCR1	9.66509e-35	3.36732e-17	-0.867951	-0.795232		EGR3	1.32827e-22	0.978958		CCDC112	9.66872e-32	-0.606958
RIPK2	2.42383e-42	4.28327e-13	0.945918	0.649444		CHRNA1	1.21771e-34	1.68987e-11	-0.904585	-0.656199		MMRN2	1.40812e-22	0.714346		DNMBP	9.98789e-32	-0.608543
ADAMTS9	3.76693e-42	5.80296e-10	1.6285	0.955663		APPL2	1.25844e-34	2.81891e-08	-1.02206	-0.6106		GPR137B	1.56803e-22	0.833011		TCEA3	1.08006e-31	-1.0841
SERPINA3	5.3457e-42	8.67514e-13	2.3821	1.62138		FOXP2	3.36027e-34	9.36174e-10	-1.05112	-0.698005		LBH	1.63937e-22	0.833262		FAAH	1.14559e-31	-0.673831
RAB31	9.78358e-42	3.10259e-20	1.58499	1.41705		EPHX1	3.53362e-34	6.6473e-16	-0.686976	-0.60724		HS3ST1	1.69765e-22	0.619015		HIGD1A	1.57532e-31	-0.770157
PTAFR	1.25086e-41	1.36011e-18	1.09431	0.932687		PLCD3	4.10531e-34	8.62636e-12	-0.807167	-0.600159		ITPRIP	1.75438e-22	0.627845		ATP8A1	1.86085e-31	-0.702098
AGPAT4	1.62616e-41	9.99407e-14	1.32137	0.945747		PTGR1	4.89715e-34	8.67514e-13	-0.828063	-0.646305		KLF7	1.98655e-22	0.706126		ACAA1	2.39634e-31	-0.637155
OSBPL3	1.85671e-41	2.3987e-09	1.02815	0.587438		NGEF	8.23387e-34	1.99669e-12	-0.766373	-0.590638		GALNT6	2.0683e-22	0.672956		COBL	2.55436e-31	-0.866854
PLAU	2.10401e-41	5.92325e-16	2.12797	1.66363		MATN2	1.90713e-33	8.17352e-17	-0.934369	-0.865525		HCST	2.12249e-22	0.608823		ADCY6	2.71319e-31	-0.672922
SLCO4A1	2.42533e-41	3.64312e-09	1.2677	0.717082		INPP5J	2.21475e-33	1.01275e-11	-0.786242	-0.590721		STAT2	2.30024e-22	0.600212		B4GALNT2	4.97257e-31	-1.54693
MLKL	2.92977e-41	4.64201e-13	0.928996	0.647816		EDN3	4.4769e-33	1.64842e-08	-1.21788	-0.761513		CD200	2.5172e-22	0.74789		SIPA1L2	5.05332e-31	-0.590822
STARD4	1.16096e-40	3.98963e-21	0.746404	0.697041		SLC23A3	1.00314e-32	4.38296e-09	-1.02237	-0.669403		PANX1	2.5172e-22	0.648519		ELL3	5.0685e-31	-0.717411
PIM2	1.43882e-40	2.34149e-16	1.8611	1.49705		ENPP1	1.52947e-32	2.87671e-08	-1.03901	-0.645312		OLFM1	2.71928e-22	0.954271		NAPEPLD	6.66245e-31	-0.886358
VWA1	1.59291e-40	1.01819e-18	0.775308	0.675285		AKAP7	1.68973e-32	2.46833e-15	-0.784515	-0.701101		KRT7	3.75227e-22	0.923681		MAML3	8.6749e-31	-0.724018
SRGN	1.79867e-40	5.17818e-19	1.79632	1.58053		PLA2G12B	2.25828e-32	9.18436e-11	-1.08709	-0.792082		ORAI2	3.9629e-22	0.745571		ALDH6A1	1.09525e-30	-0.703186
MXRA5	2.10073e-40	2.47537e-13	1.9514	1.39688		KCNK5	3.49373e-32	1.98912e-13	-0.921544	-0.767357		PNP	4.25618e-22	0.646328		ACO2	1.62863e-30	-0.621851
EVI2B	2.14679e-40	3.13084e-12	1.47143	1.00105		CA1	3.58692e-32	0.0324466	-2.56639	-0.661484		CADM1	4.3877e-22	0.828402		PTPRF	2.60847e-30	-0.878262
SPINK4	2.29466e-40	6.82256e-22	2.06668	1.9809		TM4SF5	5.00709e-32	1.81179e-17	-0.834911	-0.81313		TNFRSF1B	8.51583e-22	0.714259		GCNT2	2.72522e-30	-1.10742
GPCPD1	3.04505e-40	1.05191e-15	0.740808	0.584692		PKDCC	7.84804e-32	2.53043e-12	-1.00279	-0.799078		TMEM163	1.09219e-21	0.881352		SLC9A2	3.24648e-30	-1.14321
INPP5D	3.26203e-40	4.00612e-18	1.19397	1.02598		SRI	9.3678e-32	6.96451e-09	-0.895855	-0.589785		GMDS	1.13923e-21	0.628285		STX3	3.24648e-30	-0.682677
S100A9	4.45717e-40	7.63764e-18	2.31884	1.97859		CNTN4	1.35564e-31	8.67005e-13	-1.00658	-0.823745		SACS	1.26231e-21	0.757028		GRAMD1C	3.45551e-30	-0.946421
ART3	5.77564e-40	6.36132e-19	1.28772	1.13906		RNF128	2.08275e-31	8.11665e-14	-0.939412	-0.808179		TSC22D3	1.3431e-21	0.872682		RALGPS1	3.57421e-30	-0.703415
IRF9	5.96829e-40	9.14733e-24	0.688745	0.698084		ISX	7.32566e-31	0.000516395	-1.4496	-0.593371		EFEMP2	1.41015e-21	0.707435		KITLG	3.62877e-30	-0.702164
MMP9	1.22539e-39	1.43565e-19	2.14955	1.95009		HEPACAM2	8.89598e-31	0.000107699	-1.83648	-0.834212		ECM1	1.66658e-21	0.588216		TMEM65	4.12866e-30	-0.610723
CARD16	1.56709e-39	7.83282e-28	0.952323	1.06871		MT1X	1.36047e-30	1.24587e-07	-1.029	-0.633457		RAB23	1.73882e-21	0.617649		MPZL3	4.26532e-30	-0.597145
GBP4	1.64308e-39	5.10988e-27	1.67327	1.84559		SLC25A33	1.79207e-30	1.41503e-13	-0.773447	-0.671139		ASAP1	2.80802e-21	0.86487		ACSS2	5.90644e-30	-0.899676
SDR16C5	2.31649e-39	9.12125e-08	1.48994	0.788586		TINAG	2.59168e-30	1.03579e-08	-1.07557	-0.720793		SYTL1	3.2958e-21	0.654518		MRPL35	5.95563e-30	-0.687596
VSIG1	2.51432e-39	6.53588e-06	2.56413	1.15102		MMP28	2.93444e-30	4.55311e-15	-0.718025	-0.664601		STAT4	3.43304e-21	0.758761		HOXB5	9.85411e-30	-0.796198
PGM2L1	2.84461e-39	4.44001e-14	0.863741	0.650669		GALNT12	8.39282e-30	9.17095e-07	-1.10818	-0.645072		ZFP36L1	3.98333e-21	0.643592		RAB17	1.31205e-29	-0.674799
PEA15	2.84461e-39	2.97743e-13	0.989068	0.718802		SYTL2	8.95693e-30	3.33644e-07	-1.06098	-0.641587		TXNDC15	4.0298e-21	0.673274		FNIP2	1.44141e-29	-0.726584
CLDN1	2.937e-39	2.29729e-11	1.46274	0.97174		A1CF	1.01653e-29	1.26398e-07	-1.18236	-0.74078		IRS1	5.02411e-21	0.786231		CRYL1	1.47252e-29	-0.822511
AREG	3.02443e-39	2.81658e-11	1.37233	0.907805		ITPKA	1.16833e-29	8.51321e-13	-0.937871	-0.798837		FRY	6.58403e-21	0.767828		SH3BGRL2	1.631e-29	-0.953098
ELL2	4.06518e-39	1.55601e-10	1.07652	0.685635		PDK4	3.17043e-29	5.52439e-10	-1.18122	-0.878294		GJA4	7.70022e-21	0.717001		KLK1	1.67303e-29	-0.964366
DMBT1	6.642e-39	8.85439e-25	2.37592	2.51303		CHDH	3.20741e-29	2.95867e-13	-0.767548	-0.673841		EMILIN2	7.7567e-21	0.610132		PPP1R36	2.29e-29	-0.767568
MMP10	7.20857e-39	4.99739e-13	2.57827	1.86722		IL17RB	5.27726e-29	2.20395e-15	-0.742627	-0.714146		STXBP1	8.52614e-21	0.673231		CMTM4	2.44861e-29	-0.815347
DNAJB9	8.6114e-39	3.42684e-14	1.04917	0.800467		NAP1L2	8.91676e-29	9.30015e-22	-0.908763	-1.07713		LAMB1	9.49881e-21	0.621015		AP1AR	3.34081e-29	-0.706738
SEC11C	1.09749e-38	2.32836e-13	0.815003	0.601113		ADH6	9.66298e-29	2.17026e-06	-1.05606	-0.607246		FLT1	1.26641e-20	0.758074		CENPV	4.43841e-29	-0.685898
SELP	1.45518e-38	1.59259e-13	1.76827	1.31673		CYP2B6	1.57865e-28	2.80202e-05	-1.70506	-0.876274		BUB1	1.91255e-20	0.72909		PFKFB2	4.83791e-29	-0.806468
ISG20	1.48225e-38	8.29291e-18	0.976647	0.85381		THRB	3.48034e-28	2.52973e-06	-1.13727	-0.657718		PKIA	1.95516e-20	0.792452		NRIP1	5.23826e-29	-0.611797
KLF2	2.08472e-38	2.36168e-11	0.937312	0.631301		NHSL1	3.90952e-28	1.063e-06	-1.02597	-0.61538		SERPINB7	2.41982e-20	2.28685		SLC30A4	5.73888e-29	-0.736864
ST3GAL1	2.7962e-38	6.56352e-10	1.56924	0.978109		VIL1	8.97004e-28	7.48445e-08	-0.984037	-0.654532		MEI1	3.16016e-20	0.616823		SLC27A4	6.30755e-29	-0.681705
MZB1	3.38235e-38	1.26737e-13	1.87356	1.41017		CPA6	9.29884e-28	4.89294e-11	-1.30273	-1.06097		PLXND1	3.32328e-20	0.672684		CLIP2	6.81307e-29	-0.652318
TAPBP	4.97026e-38	5.98194e-23	0.588813	0.603425		RNF152	4.5517e-27	9.24182e-08	-0.908024	-0.60941		NEBL	3.75127e-20	0.604518		C11orf54	8.41523e-29	-0.755081
LAX1	5.11181e-38	6.70947e-12	1.68908	1.17719		SLC3A1	1.44381e-26	7.22976e-07	-1.54981	-0.97777		CENPW	4.21955e-20	0.623712		CRAT	1.14997e-28	-0.603336
CD38	5.46968e-38	3.57348e-18	1.74948	1.56301		ANO5	2.33137e-26	9.81784e-13	-1.23052	-1.12444		CHAC1	5.43229e-20	0.792589		PLEKHG6	1.18949e-28	-0.898966
TESC	6.37076e-38	2.52974e-09	1.06744	0.645655		XPNPEP2	2.98619e-26	2.07564e-13	-1.11777	-1.05601		EHD3	5.87799e-20	0.59571		NPY1R	1.23768e-28	-1.3233
COL6A3	6.71662e-38	2.91224e-12	2.21472	1.57353		LRRN2	7.81378e-26	8.27682e-12	-0.94386	-0.835948		RASGRF2	6.27488e-20	0.62991		SEMA6A	1.34345e-28	-0.955859
ADA	6.93606e-38	2.90546e-19	1.1355	1.05136		CMBL	1.77074e-25	5.02771e-06	-1.04025	-0.621713		PIP4K2A	6.79613e-20	0.664096		ABCA5	2.05541e-28	-0.706779
SERPINB8	8.39659e-38	1.5318e-13	0.950552	0.717609		DEFB1	2.50653e-25	1.82317e-06	-1.10536	-0.692262		PAM	9.86394e-20	0.59091		OPN3	3.19574e-28	-0.818734
CASP10	2.03495e-37	9.30237e-21	0.852648	0.831693		EDIL3	3.91025e-25	1.09974e-10	-1.16574	-0.99018		TWSG1	1.10269e-19	0.667535		TMCO1	4.68406e-28	-0.586869
IL33	2.03495e-37	9.8352e-09	1.61016	0.944847		SLC23A1	1.16158e-24	2.01352e-09	-0.995307	-0.794415		CRIP2	1.16184e-19	0.833645		SDR42E1	6.11663e-28	-0.600952
TFF1	2.19063e-37	3.60088e-07	1.64563	0.858549		TMED6	1.35082e-24	7.83917e-08	-1.13269	-0.810953		CARD8	1.39177e-19	0.717186		FZD5	7.29899e-28	-0.943396
PECAM1	4.68939e-37	4.62766e-12	1.74928	1.2492		MEP1B	1.48558e-24	3.63922e-05	-1.89396	-1.05336		PLXNA1	1.58962e-19	0.588824		ZNF844	7.82531e-28	-0.583252
RGS5	7.66386e-37	3.24791e-12	1.97761	1.42792		CLDN15	3.18581e-24	4.28397e-12	-0.629698	-0.588207		GPX7	1.76297e-19	0.879607		SPIRE2	8.60325e-28	-0.641172
DERL3	7.85218e-37	2.05693e-16	1.50026	1.28824		SMPDL3A	3.33025e-24	1.13136e-08	-0.913276	-0.701708		PDK1	1.90746e-19	0.700375		LGALSL	8.60325e-28	-0.663283
AGT	8.56009e-37	2.84912e-10	1.29881	0.848425		SCIN	3.45792e-24	3.6528e-05	-1.19251	-0.66928		TNFSF15	2.9475e-19	0.682462		PLEKHA6	8.6993e-28	-0.707058
HLA-F	1.02084e-36	1.41861e-29	0.629354	0.769353		PDZD3	3.86304e-24	5.75151e-06	-1.16474	-0.715496		TRPS1	3.13161e-19	0.813672		TMEM171	8.8591e-28	-0.960455
DUSP4	1.57268e-36	4.38181e-06	1.26768	0.60777		PPP1R3B	3.95753e-24	3.31146e-13	-0.620775	-0.612147		VEGFC	3.50817e-19	0.686443		ACOX2	9.34291e-28	-0.754325
RGS2	2.75303e-36	2.92382e-06	1.56939	0.768898		CYP2S1	6.67259e-24	2.53525e-15	-0.822606	-0.889589		DSG3	3.75719e-19	1.39922		LRRC19	1.54274e-27	-1.40294
LOXL2	2.96624e-36	6.1914e-13	1.67265	1.26188		PON3	1.04883e-23	1.58855e-11	-0.760961	-0.70047		TRERF1	3.8946e-19	0.678132		PCSK6	1.70068e-27	-0.76099
HLA-DMB	3.15555e-36	1.48301e-23	1.22095	1.31179		HSD3B2	6.05083e-23	0.00630704	-1.50317	-0.593515		LYPD6B	4.34954e-19	0.838544		RIMKLA	1.82733e-27	-0.735023
UNC13D	3.83565e-36	1.52361e-13	0.869661	0.676044		CYP4F2	7.73122e-23	3.65179e-07	-1.10167	-0.782132		SERPINB3	4.64737e-19	2.2909		ZNF415	1.83474e-27	-0.805428
ARHGDIB	4.7164e-36	5.67242e-13	1.44231	1.09417		MEP1A	2.21126e-22	0.000430464	-1.41973	-0.717838		SLC12A4	4.6794e-19	0.581977		ATP9A	2.84606e-27	-0.768233
XAF1	6.27714e-36	2.35362e-20	1.15137	1.13962		LGALS2	2.5667e-22	2.56871e-09	-1.18552	-0.998921		BTG2	5.68805e-19	0.719817		MLXIP	2.88516e-27	-0.645315
TAP2	6.4205e-36	1.56482e-19	0.962125	0.92961		HAVCR1	1.22773e-21	4.00491e-06	-1.12703	-0.751674		TPRG1	6.18739e-19	0.677243		PAPSS2	3.78494e-27	-0.726961
NCF2	7.36146e-36	9.33196e-16	1.80418	1.53834		PTPRR	1.86716e-20	9.27405e-06	-1.1598	-0.770822		APCDD1	6.83581e-19	0.895708		SLC22A18AS	4.29919e-27	-0.756551
CXCL11	7.83909e-36	4.14999e-18	2.60414	2.41157		CREB3L3	7.51099e-20	5.71675e-10	-1.04548	-0.984121		AP1S3	1.5173e-18	0.638103		LRRC31	4.58977e-27	-1.20282
IFI30	1.00391e-35	3.98963e-21	1.24863	1.26893		CD177	1.31467e-19	0.00262837	-1.67562	-0.793865		CARD11	1.70163e-18	0.650664		CASD1	4.88485e-27	-0.726257
FPR1	1.03913e-35	7.33519e-18	1.93768	1.78375		C9orf24	1.9793e-19	2.91349e-12	-0.633713	-0.681837		CLEC14A	2.19441e-18	0.830777		SERINC5	5.16775e-27	-0.71199
ICAM1	1.26654e-35	1.26461e-17	1.633	1.49381		FGF9	3.25736e-19	2.21743e-06	-0.790239	-0.58061		KCNN3	2.43697e-18	0.779724		MARVELD3	5.27501e-27	-0.80586
SOCS1	1.28823e-35	6.15247e-18	1.29845	1.2004		ANPEP	1.90595e-18	0.000130957	-1.69184	-1.03844		SMAP2	2.4532e-18	0.705772		TRHDE	6.39971e-27	-1.21758
IFI44	1.43457e-35	1.98225e-20	1.26381	1.26198		HPGDS	1.92974e-18	1.03743e-08	-0.920346	-0.835565		PIK3AP1	3.44949e-18	0.667975		LMTK2	8.54435e-27	-0.613992
AQP9	1.77229e-35	1.04866e-16	2.6268	2.33475		IL1R2	2.30491e-18	4.4095e-09	-0.889223	-0.829751		TIMP3	3.83352e-18	0.84456		NTPCR	8.85258e-27	-0.613616
SLC7A5	2.21074e-35	2.92305e-08	1.18879	0.699643		ST6GAL2	4.10487e-18	4.81092e-09	-1.03172	-0.968095		SLC7A7	3.94359e-18	0.824324		ACOT11	1.49329e-26	-0.695679
SLFN11	2.38393e-35	1.13765e-12	1.49462	1.13239		OTOP2	1.54453e-17	0.00105205	-1.10544	-0.605472		LRRC8C	4.14489e-18	0.657533		TMEM141	1.59486e-26	-0.739627
APOL3	2.78887e-35	3.67257e-24	0.98775	1.09672		NAT8	1.57019e-17	4.77997e-07	-0.778012	-0.641381		NID1	8.5012e-18	0.892102		TMEM37	1.80952e-26	-1.28941
SLA	4.09494e-35	3.28235e-13	1.35709	1.05859		FAM151A	1.59309e-17	1.44671e-11	-0.720675	-0.797491		ZFP36	9.56549e-18	0.607921		CYP2J2	1.83431e-26	-0.854697
NAMPT	4.20961e-35	7.74307e-16	1.12731	0.977386		ARRDC4	2.08844e-16	5.15782e-10	-0.66016	-0.698247		IGFLR1	1.03737e-17	0.694649		KRT12	1.8561e-26	-0.936387
SORD	9.26134e-35	1.47538e-11	0.835166	0.606376		AKR1B10	7.99192e-16	0.000462371	-1.06491	-0.659501		MR1	1.09907e-17	0.623212		NEK3	2.3654e-26	-0.639344
SKIL	1.03097e-34	8.93461e-12	0.844041	0.620145		GAL3ST1	3.6542e-15	2.61142e-10	-0.650244	-0.733168		OAS3	1.18006e-17	0.595965		STARD10	3.30215e-26	-0.78675
F2R	1.03196e-34	1.70507e-11	1.06777	0.773377		SLC22A4	4.02452e-15	1.04168e-06	-0.688044	-0.601301		PROCR	1.20416e-17	0.694145		PROM2	3.6017e-26	-0.673391
CD274	1.38682e-34	6.52791e-15	1.82665	1.5444		FRZB	1.16608e-14	2.47591e-06	-0.724649	-0.622698		TRAF1	1.38657e-17	0.686242		KIFAP3	4.30796e-26	-0.58682
PLAUR	2.07392e-34	1.39085e-12	1.14101	0.8758		SLC6A19	1.38884e-14	8.31406e-05	-0.869397	-0.630682		GPRC5B	1.69014e-17	0.832904		HIBCH	4.63841e-26	-0.711943
RRM2	2.84805e-34	2.20778e-12	0.957587	0.730188		PNLIPRP2	2.55781e-14	6.63217e-05	-1.34502	-0.999401		LAIR1	1.77544e-17	0.63453		ZNF823	4.77138e-26	-0.580885
IER3	2.90914e-34	2.88413e-15	1.02222	0.881098		NTRK2	1.85848e-13	3.69856e-05	-0.796226	-0.634387		C1orf54	1.99606e-17	0.593266		CDX2	4.83687e-26	-0.904618
ENTPD1	3.12262e-34	3.87464e-10	1.27615	0.866569		SLC5A11	2.17483e-13	2.38433e-09	-0.624464	-0.715545		CSGALNACT2	2.1309e-17	0.797623		PRR5L	5.18786e-26	-0.80533
ASS1	4.7177e-34	2.20374e-19	1.12493	1.11966		SLC1A1	2.56875e-13	5.84838e-09	-0.823188	-0.922262		IL23A	2.92701e-17	0.727963		SLC39A4	6.86964e-26	-0.620001
VNN2	5.91139e-34	2.87868e-12	2.03952	1.55589		SPON1	4.45888e-13	6.06406e-13	-0.761463	-1.07057		FGD3	3.2213e-17	0.632362		SEPSECS	8.19321e-26	-0.626827
OSMR	6.58241e-34	4.37241e-07	1.73767	0.9587		ABCA8	4.53625e-13	3.26104e-09	-0.923356	-1.06397		LOX	3.4644e-17	0.950783		GIPC2	8.98709e-26	-0.911264
PDPN	6.87607e-34	1.63346e-15	1.40425	1.23053		CYP3A4	7.44935e-12	1.94814e-05	-0.736973	-0.654428		TMEM71	3.93728e-17	1.0284		LRRCC1	1.05767e-25	-0.672971
SPON2	8.26888e-34	8.53234e-12	1.27269	0.951958		MAMDC2	1.61498e-11	2.48795e-05	-0.683982	-0.610259		TSPAN5	4.25743e-17	0.679419		BCL2L11	1.12484e-25	-0.607842
HAPLN3	1.05891e-33	2.84544e-17	0.904949	0.847637		HSPB3	2.26963e-10	3.36611e-09	-0.696462	-0.919839		SYTL3	4.53113e-17	0.67039		DYRK2	1.15076e-25	-0.634307
FCRL5	1.06633e-33	1.27628e-11	1.76342	1.31013		PCDH20	3.70617e-09	0.00230489	-1.02841	-0.775923		PTP4A3	5.24121e-17	0.799501		NDRG1	1.19234e-25	-0.677217
REG1B	1.0753e-33	3.20202e-22	3.98612	4.33435		TPH1	3.96428e-09	2.43423e-05	-0.814345	-0.835655		FAM78A	7.33494e-17	0.621793		LDHD	1.572e-25	-1.021
PSAT1	1.08672e-33	3.03257e-14	1.18443	0.99194		PYY	4.68991e-07	0.000526863	-0.594268	-0.591587		CALCRL	8.1708e-17	0.953788		GOT1	1.6001e-25	-0.596367
THY1	1.91709e-33	2.6488e-12	1.36941	1.05657								RGS16	8.62925e-17	0.596352		DAO	1.62866e-25	-0.784784
CEBPB	1.9622e-33	2.80078e-10	0.943944	0.655985								ZNF521	1.13861e-16	0.759142		NAT2	1.80131e-25	-0.93623
PCDH17	2.80661e-33	1.33789e-12	1.27878	1.0034								CEP170	1.13908e-16	0.73611		MB	1.81584e-25	-0.878961
JUNB	3.34828e-33	1.22687e-10	0.826115	0.588237								GLT8D2	1.35554e-16	0.809409		GMNN	1.93153e-25	-0.596262
GBP5	3.65424e-33	3.11222e-22	1.80874	1.98752								TFF2	1.359e-16	0.887425		AVIL	1.98399e-25	-0.693951
SLC6A6	4.74533e-33	3.34125e-09	1.30757	0.857389								FILIP1L	1.76823e-16	0.867474		EPB41L3	2.1293e-25	-0.80043
MUC1	5.87619e-33	4.69663e-24	1.09085	1.26164								BHLHA15	1.95249e-16	0.663418		NR5A2	2.18562e-25	-0.714069
GMFG	7.86529e-33	1.58877e-12	1.32012	1.04133								GRHL3	2.12987e-16	0.683648		PPARGC1B	3.00462e-25	-0.661472
FYN	9.1839e-33	1.2033e-11	1.15603	0.875544								SFMBT2	2.29408e-16	0.657159		TGFA	3.21979e-25	-0.642863
SLC7A1	9.47534e-33	2.92345e-14	0.712347	0.607887								ANO6	2.42266e-16	0.736439		HOXA7	3.2572e-25	-0.733568
RAB8B	1.09954e-32	3.30354e-11	1.09217	0.810061								FCHSD2	2.93833e-16	0.651209		HNF1B	4.27412e-25	-0.716315
SHCBP1	1.72747e-32	3.32401e-09	0.901575	0.597707								SMARCA1	2.95115e-16	0.636336		PRKACB	4.52046e-25	-0.653661
HLA-DPA1	1.80451e-32	9.52716e-17	1.50869	1.42074								TPST1	2.95677e-16	0.72976		HSD11B2	4.85079e-25	-1.24287
BLVRA	1.82492e-32	2.07805e-14	0.970483	0.837692								SNCAIP	2.95686e-16	0.657501		STAP2	5.50981e-25	-0.877139
CHST11	2.70195e-32	1.73405e-13	1.13968	0.949579								CCNB1	3.92379e-16	0.589405		CLMN	5.87643e-25	-0.809839
GIMAP4	2.80607e-32	5.11742e-15	1.18732	1.05312								CSRP2	5.02271e-16	0.754416		CTH	5.97231e-25	-0.652074
GRK5	3.93708e-32	4.89172e-09	0.988468	0.652515								DOCK11	6.48207e-16	0.795591		PANK1	7.08432e-25	-0.795306
DEFA5	5.1751e-32	3.52133e-28	3.23428	4.18917								PF4	7.02797e-16	0.659494		TSPAN6	7.24519e-25	-0.838759
THBD	5.78377e-32	2.48617e-07	1.29004	0.75403								PRF1	7.50933e-16	0.613		PRLR	1.00865e-24	-0.981911
ADAMTS5	7.17169e-32	3.5055e-13	1.01456	0.84061								HYAL1	8.0151e-16	0.710258		TLN2	1.16887e-24	-0.679787
APOBEC3G	1.01863e-31	1.21422e-14	1.22426	1.08235								PALMD	1.19431e-15	0.681802		TLE2	1.19769e-24	-0.757011
COL4A1	1.04402e-31	9.01322e-13	1.85042	1.50959								JAM2	1.19786e-15	0.837911		TMEM72	1.31145e-24	-1.05602
ALDOB	1.04402e-31	1.88019e-09	2.36408	1.6169								PLCB1	1.22393e-15	0.639465		HADH	1.6519e-24	-0.750105
GLCCI1	1.54436e-31	1.17207e-08	1.28834	0.838866								C2CD4B	1.22559e-15	0.624279		EPB41L5	1.71509e-24	-0.640728
RASSF5	1.65512e-31	7.69701e-11	1.1176	0.832054								MEOX1	1.3387e-15	0.733155		NBEAL1	2.13361e-24	-0.726471
PSMB10	2.33945e-31	1.32513e-20	0.646329	0.702835								ARHGEF6	1.36261e-15	0.726817		SEMA6D	2.39109e-24	-0.803692
ELOVL5	2.75069e-31	4.44412e-11	1.28087	0.970176								APLNR	1.47404e-15	0.760937		NR1I2	2.70106e-24	-0.880982
SP140	2.80004e-31	4.34458e-10	1.21118	0.868312								ALPL	1.56617e-15	0.81079		MGAT4A	2.70106e-24	-0.690991
CATSPERB	3.5921e-31	2.74201e-10	1.2729	0.925198								TFAP2C	1.76066e-15	0.653525		CPM	2.74565e-24	-0.778968
TNFAIP8	3.60679e-31	8.9105e-11	1.00526	0.750714								DENND1C	1.82538e-15	0.605133		PBX1	2.93725e-24	-0.584815
BNIP3	3.92007e-31	4.00424e-11	1.2203	0.929347								JAZF1	2.07348e-15	0.606509		CNNM4	3.14252e-24	-0.849887
FBXO6	3.95502e-31	1.4985e-16	0.819032	0.786687								EMCN	3.31175e-15	0.900033		B3GNT8	3.31973e-24	-0.642081
TMEM45A	5.07576e-31	6.03588e-09	1.4253	0.956193								ELMO1	3.3383e-15	0.761734		AUTS2	4.48587e-24	-0.585733
KCNE3	5.66102e-31	3.31453e-16	0.900459	0.856976								STC1	3.3935e-15	1.15649		SLC16A5	4.54955e-24	-0.657696
ARHGAP25	5.85801e-31	3.12433e-12	1.0578	0.854093								LAMC2	3.60155e-15	0.739556		P2RX4	4.73833e-24	-0.71195
ANKRD22	5.9265e-31	2.1829e-21	1.05684	1.18484								CTSE	5.81045e-15	1.01905		TST	5.24285e-24	-0.804467
ITGB2	7.74213e-31	1.17478e-16	1.47628	1.43173								LDB2	6.05424e-15	0.819788		GLOD5	5.55692e-24	-0.666974
CTSK	7.94053e-31	1.6232e-14	1.77656	1.59105								KIT	6.64409e-15	0.733468		GLB1L2	6.08171e-24	-0.745111
FGR	9.61613e-31	3.93582e-15	1.21469	1.11576								S100A2	7.712e-15	0.592425		PECR	6.23695e-24	-0.593938
IRF1	1.18393e-30	1.78171e-20	1.00828	1.10805								CD83	8.0167e-15	0.790697		AGMAT	6.30531e-24	-0.695126
CASP5	1.19507e-30	1.88176e-15	1.41684	1.31982								NOD2	8.43666e-15	0.686273		FXYD3	6.45039e-24	-0.919811
CYTIP	1.44158e-30	1.2766e-09	1.47089	1.04019								IRAK2	8.6115e-15	0.637947		C1orf210	6.53021e-24	-0.900631
ATP10D	1.51859e-30	7.59478e-14	0.667569	0.585174								SERPINI1	1.48336e-14	0.661231		ANKRD9	7.70235e-24	-0.596665
CHST15	1.52458e-30	8.4259e-11	1.40599	1.06503								TGFB1	1.61062e-14	0.75726		MBOAT1	9.2919e-24	-0.661458
IKBIP	2.07543e-30	1.49705e-08	0.897874	0.593713								CST7	1.87434e-14	0.72138		TNIK	9.40043e-24	-0.637173
ENG	2.49192e-30	3.7549e-10	1.26769	0.930012								TCF4	2.16972e-14	0.884664		DPF3	1.0218e-23	-0.59233
MSN	2.67375e-30	9.50124e-08	1.26812	0.792604								KRT17	2.43143e-14	0.669508		HOXA2	1.21334e-23	-0.842146
MAFF	3.13259e-30	1.27193e-13	0.856772	0.748738								ATM	2.5845e-14	0.615571		RAB11FIP1	1.35795e-23	-0.624857
CSRNP1	4.36392e-30	5.919e-13	0.690524	0.587162								TIGIT	2.63659e-14	0.695981		GGH	1.45032e-23	-0.654633
C1R	6.03063e-30	8.399e-13	1.59442	1.35034								ITGA4	2.6939e-14	0.781483		ZBTB7C	1.49803e-23	-0.781617
HCLS1	1.00678e-29	6.86344e-12	1.40707	1.14674								DUSP5	2.93475e-14	0.631065		TP53INP2	2.31789e-23	-0.720017
ZG16B	1.04734e-29	5.81718e-09	1.0636	0.733977								GJA1	2.96962e-14	1.22845		KCNJ2	3.35289e-23	-0.880743
MNDA	1.40196e-29	2.94599e-14	1.87431	1.70475								BAIAP2L1	3.63558e-14	0.644462		ERBB3	3.38804e-23	-0.869336
GPR183	2.09969e-29	7.28444e-08	1.41261	0.907589								ARHGAP15	3.82357e-14	0.896267		SCN9A	6.4765e-23	-0.930829
TACSTD2	2.1885e-29	9.60308e-06	1.15659	0.614659								SCRN1	4.27906e-14	0.623078		ZNF43	7.2627e-23	-0.608111
AQP3	2.48125e-29	5.5941e-11	0.798111	0.626002								TNFAIP3	4.9296e-14	0.633833		CA7	7.42914e-23	-1.47918
ADAM19	2.85843e-29	1.0888e-10	1.05415	0.814917								LTBP2	4.94905e-14	0.628282		MOGAT2	9.60629e-23	-1.06243
SLC5A1	6.19096e-29	8.67514e-13	1.2019	1.03913								TTC9	5.23756e-14	0.686836		ERBB2	1.10735e-22	-0.667907
SLCO1B3	9.01326e-29	0.00172829	2.03396	0.791118								MYO1G	5.59547e-14	0.633606		SLC41A2	1.18582e-22	-0.586982
GBP2	9.80137e-29	2.33707e-20	0.994696	1.13411								TNFSF8	8.73076e-14	0.780153		LANCL3	1.48976e-22	-0.745176
CDH5	1.03481e-28	4.57654e-09	1.11507	0.791469								S100B	8.73389e-14	0.777407		ETHE1	1.66055e-22	-0.748546
SCD	1.08297e-28	1.70883e-13	1.13068	1.01493								TIMP2	8.90569e-14	0.817957		SERINC2	2.56429e-22	-0.684886
LPL	1.13513e-28	6.14888e-19	0.89449	0.978798								PRR16	9.0129e-14	0.615151		EHHADH	4.00295e-22	-0.715264
RHOH	1.21117e-28	6.91859e-10	1.45541	1.08941								CD248	9.62396e-14	0.61124		SLCO4C1	4.39269e-22	-0.855756
PTPRC	1.40627e-28	1.9819e-11	1.62562	1.32642								SERPINE2	1.05124e-13	0.743823		GRTP1	4.45987e-22	-0.584012
BCL6	1.4586e-28	1.45762e-10	1.32341	1.03152								TUBA1A	1.05168e-13	0.620079		TMEM220	5.07022e-22	-0.860386
CDH11	1.656e-28	1.13596e-12	1.45612	1.26365								FMNL1	1.11064e-13	0.613064		MXI1	5.12581e-22	-0.793377
DEFA6	1.99409e-28	3.96327e-29	2.65146	3.7761								HSPA6	1.11091e-13	0.685874		ZBTB10	5.51107e-22	-0.635299
SAMSN1	2.27332e-28	8.14316e-11	1.42808	1.1337								C11orf96	1.16814e-13	0.947399		SYT17	5.90396e-22	-0.648542
BCL2A1	2.28386e-28	2.40077e-11	1.84077	1.50246								MYBL2	1.30134e-13	0.581006		SIAE	8.64125e-22	-0.682077
RNF24	2.43486e-28	6.05949e-13	0.739097	0.651951								CYSLTR1	1.68614e-13	0.747665		PNPLA4	1.27644e-21	-0.696572
SPARC	2.57447e-28	2.10318e-10	1.73683	1.34913								TNFRSF11B	1.74911e-13	0.916427		ZNF681	1.32192e-21	-0.640468
CXCL9	2.66874e-28	7.72412e-22	2.18924	2.6284								LAT2	1.86586e-13	0.669458		KRCC1	1.70397e-21	-0.590844
CXCR4	2.9708e-28	6.42189e-08	1.75699	1.16181								FLNA	1.9521e-13	0.648434		ACAA2	2.04317e-21	-0.742706
IL2RA	3.25229e-28	5.08048e-16	1.09473	1.0968								FST	2.02074e-13	0.677578		CES3	2.236e-21	-0.906155
BASP1	3.31543e-28	1.14436e-11	1.29992	1.08273								LOXL1	2.16663e-13	0.870724		BCL2L14	2.87613e-21	-0.583303
MFSD2A	3.45333e-28	2.47471e-12	0.823804	0.708715								PLXNC1	2.72199e-13	0.784188		PCCA	1.03553e-20	-0.801166
CYTH4	4.23778e-28	4.66876e-09	1.02795	0.739025								ESAM	3.39666e-13	0.612743		CD160	1.06867e-20	-0.704679
PROK2	4.33369e-28	3.3148e-11	2.1963	1.79115								CD79B	4.69851e-13	0.728937		SLC39A2	1.26611e-20	-0.64669
IGFBP7	4.40604e-28	8.4322e-10	1.41794	1.06881								FGF7	4.96479e-13	0.827597		ILDR1	1.33532e-20	-0.631019
ARL4C	5.14317e-28	5.34585e-13	0.868034	0.773187								FJX1	5.76256e-13	0.61626		GATA6	1.70615e-20	-0.598543
CHST2	5.40105e-28	7.27573e-09	0.903391	0.64274								FGF2	1.02721e-12	0.777307		VAV3	1.80398e-20	-0.724311
WNT5A	6.4388e-28	2.99123e-13	1.6809	1.51771								JAM3	1.12618e-12	0.592161		HOOK1	3.15702e-20	-0.732145
RHBDF2	6.52727e-28	6.25183e-14	0.791083	0.736212								PARVG	1.34373e-12	0.617318		CASP6	3.55513e-20	-0.630891
STEAP4	8.86882e-28	1.0778e-08	1.60535	1.13444								MRGPRF	1.3755e-12	0.680417		ATP13A4	3.80993e-20	-0.704402
WIPF1	9.21251e-28	3.53709e-11	1.24349	1.02005								QKI	1.50696e-12	0.81057		HPGD	5.12202e-20	-1.09494
CYYR1	1.09642e-27	1.26488e-06	1.21122	0.728619								RHOJ	1.91125e-12	0.71949		MAGI3	6.08737e-20	-0.63527
AIM2	1.10201e-27	1.45284e-10	1.36229	1.08277								TIFA	1.98643e-12	0.604763		TMC4	6.31321e-20	-0.686936
LCP2	1.11614e-27	1.47509e-13	1.31032	1.20625								IKZF3	2.31929e-12	0.81335		CBLC	6.36713e-20	-0.592453
MGP	1.14175e-27	1.55534e-07	1.72505	1.12205								KCNJ8	2.99622e-12	0.609304		ZNF439	9.1988e-20	-0.759547
NCALD	1.15355e-27	2.90271e-13	0.645295	0.586372								LILRB4	3.39066e-12	0.592765		MYO1A	1.62128e-19	-0.879046
ITGAX	1.18064e-27	1.44423e-11	1.30042	1.09097								LPXN	4.29022e-12	0.616847		CLDN23	1.66631e-19	-0.774037
NLRC5	1.21411e-27	2.75234e-24	0.673559	0.874759								TIE1	4.41046e-12	0.681968		GLIPR2	2.17256e-19	-0.634568
NCF4	1.41656e-27	2.25003e-10	1.0275	0.810148								MOXD1	5.389e-12	0.64806		HOXA6	2.17338e-19	-0.680772
PLA2G2A	1.67128e-27	4.47766e-16	1.45791	1.48749								SGIP1	8.41242e-12	0.662765		GCNT1	3.00042e-19	-0.599538
IL10RA	2.92032e-27	4.72495e-11	1.10927	0.914346								NID2	9.92639e-12	0.620218		ABCC3	3.55117e-19	-0.591948
HCAR3	3.32531e-27	2.86115e-14	2.50071	2.39772								SIRPG	1.12122e-11	0.658664		GUCY2C	9.30072e-19	-0.804988
CD34	3.3591e-27	1.23975e-08	1.02497	0.730718								FCRL3	1.22809e-11	0.982787		KLF5	9.77227e-19	-0.683861
SPOCK2	3.62724e-27	6.52421e-12	0.944201	0.814706								GFPT2	1.33418e-11	0.781728		BEST4	1.20961e-18	-1.40971
GEM	4.02382e-27	1.01588e-05	1.26467	0.704613								DDR2	1.34065e-11	0.675613		LRRC1	1.28383e-18	-0.643355
EAF2	4.94729e-27	4.52645e-09	1.03173	0.760606								C1orf162	1.35537e-11	0.630031		YBX2	1.41361e-18	-0.600571
PTGS2	5.58047e-27	3.75917e-08	2.14964	1.48832								CAV2	1.64254e-11	0.666991		NVL	2.12324e-18	-0.617307
PMP22	5.66728e-27	0.000236312	1.26028	0.591982								ARHGAP29	1.73237e-11	0.732304		CHN2	3.34434e-18	-0.642215
SPP1	5.74791e-27	7.83815e-09	2.04206	1.48376								MMRN1	1.75224e-11	0.867657		GRHL2	3.48262e-18	-0.637188
CCL4	6.45074e-27	1.05024e-08	1.47947	1.06707								SLAMF6	1.82187e-11	0.661272		CFTR	3.58539e-18	-0.814201
USP18	6.89277e-27	2.45445e-14	0.696812	0.674791								CD180	1.90945e-11	0.892209		RGMB	4.61395e-18	-0.669714
TK1	7.55488e-27	1.73048e-13	0.638831	0.597465								ERG	1.99103e-11	0.599118		PAQR8	4.8614e-18	-0.63632
FLI1	8.36107e-27	3.1794e-08	1.19821	0.837467								RNF144B	2.41825e-11	0.580326		HOXA3	5.83826e-18	-0.672667
PLVAP	8.41782e-27	7.24329e-10	0.949511	0.739864								RNASE6	2.58974e-11	0.695655		SLC4A10	1.14111e-17	-0.684774
CIITA	8.54435e-27	1.34818e-21	0.730524	0.901265								ANKRD44	2.81622e-11	0.705841		SEMA4G	1.18006e-17	-0.651933
CXCR2	8.78153e-27	1.10297e-09	1.66544	1.28388								ENO2	3.10636e-11	0.590886		SLC20A1	1.3093e-17	-0.715761
WDR44	9.88898e-27	6.15247e-18	0.66623	0.737827								LILRA3	3.81464e-11	0.832022		SCNN1B	1.62187e-17	-1.1642
TMTC1	1.00267e-26	9.78765e-08	1.09813	0.741401								EBF1	3.99499e-11	0.796821		NR3C2	1.84785e-17	-0.779355
NNMT	1.00769e-26	1.1807e-10	1.74239	1.4226								GJC1	4.11972e-11	0.607829		GABRA2	4.87947e-17	-0.755397
C3	1.17037e-26	3.58956e-09	1.97737	1.48017								GGT5	4.75363e-11	0.585216		PPP1R1B	5.24282e-17	-0.597622
VAMP5	1.36723e-26	2.36272e-17	0.624792	0.680723								SLC9B2	7.7151e-11	0.587894		DQX1	5.83587e-17	-0.72037
HLA-DPB1	1.73529e-26	2.16661e-14	1.38487	1.35651								IGF2BP3	8.54612e-11	0.696273		DEPTOR	6.36611e-17	-0.602494
CD93	1.88347e-26	1.2792e-07	1.42337	0.958339								PRNP	9.22464e-11	0.631159		PDE3A	6.84043e-17	-0.650657
BCL3	2.11161e-26	1.93873e-14	0.612124	0.601924								COL5A1	1.18212e-10	0.706277		EPN3	7.21728e-17	-0.590115
ITGA5	2.14714e-26	2.38681e-10	1.27655	1.03265								HGF	1.19838e-10	0.770176		PFN2	7.84115e-17	-0.616192
CEP55	2.56397e-26	1.11013e-07	0.859138	0.58305								TNS4	1.28633e-10	0.675136		NEDD4L	1.03531e-16	-0.769842
SRPX2	2.77747e-26	3.62029e-09	1.11166	0.839197								CLMP	1.32548e-10	0.609108		ATP8B1	1.77301e-16	-0.633783
IGFBP5	2.93173e-26	2.4094e-09	1.78633	1.36483								ISLR	1.33554e-10	0.640673		PLEKHH1	1.88065e-16	-0.605813
MMP14	2.93971e-26	3.42449e-12	0.711124	0.634955								TCL1A	1.50592e-10	1.11186		TFCP2L1	2.34741e-16	-0.768414
TEK	3.41138e-26	5.32567e-07	1.0844	0.69822								NRG1	1.63568e-10	0.656084		TTPA	2.90504e-16	-0.635755
ICAM2	3.50057e-26	2.08358e-08	1.17354	0.843205								BTLA	1.66023e-10	0.636118		MT2A	3.09387e-16	-0.783356
GM2A	3.62919e-26	1.76222e-10	0.713398	0.584465								SEMG1	2.02764e-10	0.611837		PPP1R14C	3.2952e-16	-0.667292
PRKCH	3.95962e-26	5.81718e-09	0.82297	0.615047								LTF	2.08831e-10	1.09143		MARVELD2	3.63292e-16	-0.681747
CXCL10	4.42843e-26	9.80785e-15	2.13681	2.14189								MYO5A	3.22514e-10	0.613561		TMEM144	4.60298e-16	-0.640018
ACSL4	4.67022e-26	8.99832e-10	1.38439	1.09131								P2RY10	6.3127e-10	0.734771		FUCA1	5.1777e-16	-0.618209
MYO1F	4.82065e-26	3.46517e-11	0.886776	0.757166								COL6A1	7.70801e-10	0.70208		SLC44A3	6.05822e-16	-0.621841
ANGPTL4	4.94158e-26	1.17669e-07	1.11843	0.762659								PAPPA	7.75603e-10	0.629463		SHROOM3	6.68758e-16	-0.606213
LCP1	4.95815e-26	1.44671e-11	1.31897	1.14868								CR1	7.94231e-10	0.729904		PIP5K1B	7.25765e-16	-0.61651
PDGFRB	5.46285e-26	8.03936e-11	1.11864	0.938027								CR2	8.59606e-10	1.34819		HNF4A	7.42744e-16	-0.638529
IL7R	5.98335e-26	1.25366e-13	1.70292	1.63688								A2M	1.22631e-09	0.823786		ATP2C2	8.24715e-16	-0.695865
CCL11	9.98285e-26	1.1639e-12	1.45143	1.34144								RSPO3	1.48691e-09	0.821065		PTPRO	8.89736e-16	-0.590724
SPAG4	1.333e-25	8.47423e-08	1.03866	0.723566								MCTP1	1.52963e-09	0.71658		NUDT12	9.34943e-16	-0.652865
FBN1	1.33751e-25	3.28479e-08	1.49294	1.07236								SDC2	1.87581e-09	0.705173		OTC	9.72165e-16	-0.891209
PLEKHO2	1.35947e-25	1.36858e-11	0.741797	0.653567								IKZF1	1.88765e-09	0.584438		MS4A12	9.97904e-16	-1.8114
DYSF	1.36845e-25	5.16969e-12	1.03725	0.933109								DUSP1	1.9562e-09	0.589765		WNK4	1.02817e-15	-0.618969
LY96	2.63579e-25	1.59065e-09	1.53203	1.21091								MAFB	2.5749e-09	0.633949		HEBP1	1.08705e-15	-0.583224
PDE4B	2.78719e-25	6.40787e-07	1.26097	0.824048								CRISPLD2	3.67665e-09	0.677821		ABCB11	1.72298e-15	-0.607527
PLK3	2.84088e-25	6.97601e-09	0.78921	0.59887								PCDH18	3.89693e-09	0.673704		DISP2	1.84697e-15	-0.788896
LAMP3	3.21583e-25	7.50885e-17	1.50362	1.66366								CD28	4.0177e-09	0.596827		ASPA	2.829e-15	-0.714509
CD53	3.27261e-25	3.28747e-10	1.40244	1.15775								FERMT2	5.2077e-09	0.806122		GGT6	3.27769e-15	-0.612424
COL4A2	3.277e-25	4.63129e-09	1.24226	0.955419								TMEM158	5.57656e-09	0.616631		ESRP1	3.36005e-15	-0.702667
SLAMF7	3.28898e-25	3.5055e-13	1.47136	1.41076								CCL21	5.78662e-09	0.864197		CGN	7.23766e-15	-0.650412
S1PR1	3.47392e-25	1.05969e-06	0.908449	0.583639								NFE2	7.45485e-09	0.623116		CDHR5	7.32403e-15	-0.806195
MFNG	4.07333e-25	1.61114e-09	0.809865	0.642902								KRT6A	8.59938e-09	0.664491		ENPP3	1.31558e-14	-0.706904
CD27	4.39739e-25	9.24182e-08	1.1909	0.837752								KCNA3	9.48228e-09	0.652614		HHLA2	1.40555e-14	-0.930279
CCR6	4.98492e-25	7.86014e-09	0.89384	0.67999								SLC26A4	1.04605e-08	0.739287		ACSM3	1.68405e-14	-0.761491
TAGAP	5.42963e-25	3.30711e-10	1.66954	1.38549								KLK6	1.09521e-08	0.836293		HRCT1	3.32133e-14	-0.814841
IL21R	6.09586e-25	4.43707e-08	1.05421	0.762109								ZEB2	1.12424e-08	0.613017		USP2	4.20572e-14	-0.738305
MAP3K8	6.3686e-25	7.9457e-09	0.884255	0.674236								FADS2	1.30833e-08	0.64044		HNF4G	4.53713e-14	-0.737746
CCDC3	9.00555e-25	2.21598e-05	1.42527	0.808923								PDGFRA	3.10357e-08	0.812824		SLC13A2	4.98165e-14	-0.88787
LILRB2	9.29469e-25	5.70419e-11	1.21596	1.0588								DKK1	3.44172e-08	0.765361		EYA2	6.27715e-14	-0.948006
POU2AF1	9.83601e-25	1.59107e-08	1.59785	1.19886								TMEM156	3.77153e-08	0.589557		SVOPL	7.82626e-14	-0.728784
HPSE	1.00731e-24	3.24436e-11	0.754916	0.666601								NAPSB	4.21568e-08	0.639241		NETO2	8.38263e-14	-0.819423
DOCK4	1.17717e-24	4.63197e-11	0.787564	0.691066								PLTP	4.23972e-08	0.637216		ANXA13	1.12531e-13	-0.670616
IFI35	1.32786e-24	1.87921e-13	0.627159	0.617969								ANTXR1	5.48477e-08	0.782767		GDPD2	2.02696e-13	-0.795668
KDR	1.37211e-24	3.98938e-08	1.09656	0.802497								CCDC88A	6.38295e-08	0.617383		SECTM1	2.78629e-13	-0.656325
FHL2	1.40267e-24	5.36956e-11	0.710341	0.622307								GAPT	7.24842e-08	0.640061		MAB21L3	7.5176e-13	-0.633845
COL1A1	1.44159e-24	2.36053e-09	1.77238	1.41193								ADAMTS2	8.4275e-08	0.687019		CAPN9	9.43649e-13	-0.801687
CD79A	1.53823e-24	1.92625e-05	1.55672	0.895045								TRPA1	1.08772e-07	0.586007		ZG16	2.2519e-12	-1.1706
GIMAP2	1.58411e-24	2.79437e-12	0.834682	0.780619								GNLY	1.3108e-07	0.591686		ETNK1	2.42031e-12	-0.677923
SNX10	2.27139e-24	2.36882e-15	1.15127	1.23159								P2RY14	1.67663e-07	0.597376		ALPI	3.03345e-12	-0.62099
COL5A2	2.54178e-24	6.39969e-08	1.41101	1.02374								NLRP3	2.2656e-07	0.618119		EDN2	6.47255e-12	-0.582583
SIRPA	2.59168e-24	1.63914e-11	0.777546	0.704194								FOSB	2.35505e-07	0.896753		PRR15L	9.93405e-12	-0.607336
CXCL6	3.22001e-24	8.54156e-11	1.87284	1.63761								LAMA4	2.50767e-07	0.598468		VSTM2A	1.84958e-11	-0.603933
DOCK8	3.38364e-24	2.54297e-08	1.19654	0.897053								ADAM28	2.94974e-07	0.592179		SLC37A2	2.22738e-11	-0.816332
PXDN	3.44778e-24	1.52075e-08	1.28332	0.977495								NR4A3	3.83702e-07	0.591743		CDH17	2.50973e-11	-0.641118
LAMC1	3.64687e-24	2.63948e-06	1.20796	0.767012								CFH	8.25483e-07	0.704487		CLRN3	3.84639e-11	-0.622717
ETV7	4.35346e-24	4.73505e-16	0.656238	0.726002								KLK7	1.15137e-06	0.608353		NR1H4	3.86821e-11	-1.00224
BTN3A2	5.49182e-24	1.36554e-14	0.694086	0.728471								STAP1	1.26764e-06	0.793262		PLCB4	5.44994e-11	-0.607947
TM4SF18	6.22731e-24	7.574e-07	0.893972	0.600471								MUC17	1.40143e-06	0.76619		SOSTDC1	1.10928e-10	-0.669827
RFTN1	8.50902e-24	5.31468e-08	1.23421	0.912987								POSTN	5.03475e-06	0.875811		RBP2	1.5965e-10	-0.588789
SLC2A3	9.51054e-24	4.57272e-07	1.30796	0.899545								MGAM	6.8611e-06	0.666683		POF1B	1.07679e-09	-0.607045
IFIT3	1.38197e-23	1.76068e-15	1.18085	1.29525								TM4SF20	7.52313e-06	0.875802		GPA33	1.2036e-09	-0.60258
HTRA1	1.42871e-23	4.56481e-09	0.99303	0.796344								CD22	1.47283e-05	0.58132		SCGB2A1	1.67433e-09	-0.605527
TRPV2	1.65975e-23	4.3456e-09	0.788157	0.634087								PLAT	2.29095e-05	0.605367		RBM24	2.68039e-09	-0.614012
RAB34	1.78465e-23	1.97838e-07	0.86861	0.62002								CXCR5	2.57559e-05	0.586185		FABP2	5.16037e-09	-0.696297
VIM	1.9481e-23	1.42731e-07	1.21999	0.881618								IL24	0.000332768	0.58628		CA4	2.88036e-08	-0.814437
TNFAIP2	1.95098e-23	1.277e-12	1.10502	1.07945								ANXA10	0.000434401	0.649889		SLC26A3	3.77006e-08	-0.852422
TNFSF13B	2.63887e-23	1.18332e-12	1.15252	1.13143								SLC28A2	0.000601949	0.667277		RETNLB	5.73051e-08	-1.05252
RGS1	2.8641e-23	2.79427e-06	1.40881	0.913051								PI15	0.00271939	0.68732		CCL23	1.09574e-07	-0.612354
ZFPM2	3.27812e-23	3.34554e-08	0.778303	0.59334												ATOH1	1.62794e-07	-0.601621
SERPING1	3.2787e-23	5.33934e-11	1.29174	1.17212												HHIP	4.88186e-07	-0.593492
KLHL6	3.3313e-23	1.81393e-07	1.22051	0.879992												SLC9A3	3.3898e-06	-0.581951
LGALS1	3.41722e-23	1.06047e-06	1.07151	0.724004												BTNL3	6.26122e-06	-0.584949
SLC15A3	3.71632e-23	6.44259e-12	0.950596	0.905154												CLCA1	6.55075e-06	-1.07907
LAPTM5	5.09556e-23	4.64623e-09	1.22657	0.997189												PITX2	0.000108914	-0.586868
OLFML2B	5.45031e-23	8.76234e-09	0.93058	0.743347												ADAMDEC1	0.00015872	-0.650436
IGKV1D-8	5.65896e-23	3.48628e-07	1.28157	0.908086
SELPLG	7.21548e-23	1.58815e-11	1.04033	0.978709
SELL	7.24808e-23	3.20404e-06	1.76243	1.14783
CCL2	7.26716e-23	2.11793e-10	1.6885	1.49588
LEF1	7.47497e-23	2.69513e-07	0.923589	0.662646
ANGPTL2	7.96908e-23	2.39176e-07	1.23172	0.888182
RAMP3	8.4374e-23	3.58835e-08	0.773231	0.594525
JAK3	9.18526e-23	1.51614e-06	0.975449	0.657025
FCN3	1.16667e-22	8.884e-09	1.04247	0.839692
SCPEP1	1.22305e-22	1.93958e-13	0.706909	0.732345
PLEK	1.4114e-22	6.57495e-11	1.59999	1.46922
DENND5A	1.55401e-22	5.82195e-07	0.97618	0.686942
ARHGAP9	1.71391e-22	6.04383e-09	0.970391	0.794051
RND1	1.83743e-22	3.56257e-07	0.897178	0.644002
FAM167B	2.20692e-22	9.81088e-13	0.668108	0.67486
TSPAN11	2.26933e-22	7.09356e-07	0.931603	0.653532
G0S2	2.37327e-22	6.83607e-07	1.47545	1.0371
ARMCX2	2.5172e-22	5.59667e-11	0.725098	0.672819
CD2	2.64782e-22	1.73494e-10	0.886966	0.801672
PTPN7	2.99615e-22	4.63257e-09	0.720515	0.598083
CORO1A	3.18693e-22	1.953e-07	1.19213	0.880132
LY6E	3.31255e-22	1.37013e-08	0.815596	0.656458
TNFRSF9	4.4351e-22	9.18635e-07	0.93672	0.655888
IL13RA2	4.57722e-22	4.65869e-05	1.77995	1.04207
SASH3	5.6812e-22	6.38059e-09	0.814443	0.674972
RNF183	5.73183e-22	7.73251e-08	0.803991	0.616918
GZMB	6.73151e-22	5.68233e-11	1.20703	1.1328
GNG11	8.5982e-22	1.34407e-07	1.06512	0.805987
SH3BP5	8.7663e-22	3.25889e-06	0.910831	0.610489
SLAMF8	1.01117e-21	2.34149e-16	1.011	1.20412
PCOLCE	1.06469e-21	9.87716e-07	1.31268	0.926197
HLA-DQB1	1.07403e-21	1.54385e-10	1.41276	1.30194
SLAMF1	1.09711e-21	1.81869e-11	1.00381	0.972223
STX11	1.14325e-21	1.55137e-09	1.0443	0.907988
SNX20	1.22899e-21	1.27179e-12	0.882897	0.905308
CHN1	1.23849e-21	3.19489e-09	1.20718	1.03027
ANXA6	1.26382e-21	9.53169e-06	0.931317	0.597849
PREX1	1.26945e-21	1.5142e-09	0.973141	0.847852
MX2	1.30765e-21	1.24543e-06	0.964822	0.67604
HLA-DOB	1.35098e-21	3.95883e-08	1.23537	0.978624
RHOQ	1.38932e-21	4.85661e-08	0.808047	0.636087
TLR4	1.61797e-21	2.11966e-07	0.823822	0.618403
VCAN	1.73665e-21	2.40395e-07	1.27284	0.951845
EGR1	1.76416e-21	2.459e-05	1.37606	0.847354
DSE	1.89548e-21	8.02321e-10	1.15667	1.02988
S100A4	1.90185e-21	3.24436e-07	0.881154	0.65259
KLK10	2.01191e-21	0.0327684	2.1997	0.72761
S100A12	2.18894e-21	1.79681e-08	1.96442	1.6043
MDK	2.42282e-21	1.47885e-21	0.65839	0.932334
FOS	2.58257e-21	6.89804e-06	1.52054	0.999114
SLC16A14	2.79091e-21	4.53374e-06	0.977889	0.655323
VSNL1	2.99024e-21	5.46122e-09	0.83413	0.708442
ADAM8	3.05215e-21	5.32306e-14	0.844575	0.931693
MCAM	3.72017e-21	1.25167e-06	0.870045	0.617325
IFIT5	4.28617e-21	4.15985e-13	0.613944	0.653855
CD69	4.60104e-21	1.09738e-06	1.22268	0.874498
FAP	5.38168e-21	5.29497e-13	1.52897	1.62519
HEG1	5.72929e-21	4.96236e-05	1.02032	0.613667
CD3D	5.75244e-21	1.02661e-07	0.785158	0.613712
CHI3L2	6.28866e-21	1.85943e-07	1.27948	0.981127
IRF4	8.00175e-21	2.79427e-06	1.01283	0.702048
KLHL5	8.171e-21	1.04487e-05	1.17623	0.769298
IL1A	8.24556e-21	5.666e-06	1.34959	0.907637
EMP3	8.67139e-21	6.8746e-06	0.883508	0.589411
MMP19	9.56931e-21	1.7823e-07	0.952237	0.735135
SERPINB9	9.58873e-21	3.32969e-05	1.15552	0.715346
CSF2RB	1.31323e-20	2.49358e-08	1.27176	1.05154
LILRB1	1.314e-20	6.57116e-10	0.81936	0.751285
SLC40A1	1.37194e-20	5.50655e-09	0.816323	0.706472
RGS18	1.51285e-20	2.5097e-09	0.887569	0.786621
ICOS	1.94582e-20	3.65179e-07	1.1208	0.850937
IL1R1	1.97959e-20	1.24208e-06	1.09856	0.796324
GIMAP7	2.25275e-20	6.87053e-09	0.883826	0.764886
TFPI	2.60906e-20	0.000115517	1.21482	0.709355
EGR2	2.73332e-20	1.71201e-08	0.895055	0.755616
GYPC	2.80951e-20	3.4161e-09	0.725227	0.642259
BATF2	3.67286e-20	4.43821e-13	0.703255	0.768665
KLK11	3.75127e-20	4.8668e-06	0.847844	0.585194
PLA1A	3.8181e-20	1.32811e-07	0.896895	0.711925
PPP1R16B	4.07401e-20	1.91305e-06	0.898917	0.646342
SELE	4.51585e-20	7.98311e-07	1.76022	1.31248
FCN1	4.86569e-20	1.19726e-11	1.02922	1.05535
CXCL5	4.99344e-20	2.64408e-10	1.90288	1.81656
ANGPT2	5.76159e-20	5.13455e-08	0.901535	0.742327
DOCK2	5.79475e-20	7.74197e-07	1.03886	0.778017
TMC5	5.82081e-20	9.75721e-10	0.948938	0.877807
SOD2	5.86596e-20	4.03759e-13	0.980596	1.0804
PRKCB	6.59175e-20	9.76547e-06	0.950681	0.640766
LRRC32	6.60726e-20	8.41673e-08	0.761762	0.618541
BST2	6.66365e-20	1.24009e-08	0.927641	0.800053
CLEC4A	6.83276e-20	6.94506e-08	1.0341	0.845321
SULF1	6.84454e-20	1.6488e-06	1.28709	0.937414
BGN	9.88753e-20	6.05162e-06	1.04573	0.724096
TMEM154	1.00322e-19	6.30195e-07	0.954236	0.725497
CSGALNACT1	1.12931e-19	5.77654e-05	1.08427	0.671873
GVINP1	1.144e-19	3.50638e-08	0.732128	0.615908
LAP3	1.16184e-19	2.53043e-12	0.618412	0.662602
F2RL2	1.2297e-19	8.35346e-06	1.10261	0.754759
SLPI	1.57266e-19	5.36045e-08	0.965325	0.804387
APBB1IP	1.73836e-19	3.24422e-06	0.955813	0.685275
TNC	1.81757e-19	0.000207517	1.80915	1.04509
SPHK1	1.97681e-19	3.20301e-07	0.783775	0.616335
P2RY8	2.03178e-19	1.24984e-07	1.16386	0.94649
CHRDL2	2.06401e-19	6.72164e-06	1.13169	0.787621
CH25H	2.19691e-19	6.99895e-08	0.925539	0.76823
CD300A	2.23627e-19	6.30035e-08	0.724712	0.603681
HBEGF	2.26023e-19	1.75945e-05	0.992611	0.661536
CLEC4E	2.26736e-19	1.28619e-16	1.19963	1.5451
FOXQ1	2.30778e-19	1.04589e-05	0.895079	0.611464
RASSF2	2.76192e-19	6.73232e-06	1.15073	0.803958
CLEC2B	3.18941e-19	8.5315e-08	0.877469	0.727292
IL18R1	3.29772e-19	1.1644e-09	0.806594	0.760062
ENTPD3	3.42417e-19	5.71419e-16	0.689333	0.87208
CLU	3.70072e-19	0.000463005	1.38164	0.763333
PLEKHO1	3.94744e-19	3.38041e-11	0.900164	0.927546
PAPLN	4.38387e-19	8.63526e-07	0.918873	0.70408
GPR65	4.63276e-19	2.96566e-07	0.955377	0.762139
CPXM1	4.91421e-19	1.84099e-09	1.01719	0.951987
ARHGAP30	5.78169e-19	1.1713e-07	0.838353	0.693021
LRRK2	5.79026e-19	1.51957e-07	1.0429	0.854553
PLA2G7	5.85025e-19	1.16295e-10	1.24314	1.25099
GIMAP8	7.1837e-19	1.3914e-08	0.819946	0.72761
BATF	7.71373e-19	1.33094e-10	0.744557	0.74968
C1S	7.96727e-19	2.10659e-08	1.52576	1.33899
CSF3R	8.35695e-19	1.87522e-06	1.09628	0.82155
GLIPR1	9.21546e-19	1.74622e-07	1.10134	0.903933
TREM1	1.04662e-18	9.18227e-06	1.45973	1.02419
BANK1	1.1589e-18	0.000158585	1.47054	0.885913
STS	1.53418e-18	3.9197e-05	1.05336	0.691316
ROBO1	1.64034e-18	5.99796e-06	1.12815	0.811918
DOK3	1.65189e-18	5.40255e-06	0.813678	0.588343
ACSL1	1.7379e-18	1.0346e-10	1.06381	1.08987
COL15A1	1.82376e-18	6.15459e-05	1.29698	0.831726
SBNO2	1.85475e-18	6.08668e-09	0.722857	0.666097
PNOC	1.93199e-18	8.72334e-06	1.02456	0.726796
MX1	2.05391e-18	6.23254e-10	0.748227	0.735093
ITGAL	2.13633e-18	1.9123e-08	0.769482	0.686657
BTK	2.23149e-18	2.05894e-05	0.935858	0.638536
KMO	2.63551e-18	6.15004e-07	0.969416	0.771475
LST1	2.84259e-18	1.05081e-10	0.748614	0.771976
TLR2	2.89398e-18	4.5566e-10	1.07584	1.07064
PCSK9	3.54804e-18	7.59863e-15	0.658011	0.824444
GZMK	3.71082e-18	0.000187486	1.32097	0.800631
ITPR1	3.71946e-18	2.46789e-06	0.822976	0.622697
CD86	3.83248e-18	3.91009e-08	0.924803	0.813798
UCP2	4.13975e-18	5.52348e-07	0.806196	0.648383
CLEC7A	4.14073e-18	4.45339e-08	0.900039	0.789538
AEBP1	4.41947e-18	1.23021e-06	0.859821	0.67099
C5AR1	4.56265e-18	1.44837e-05	0.95939	0.672861
FPR2	5.20999e-18	2.92716e-09	1.22917	1.17407
TMC8	5.40877e-18	6.52608e-08	0.668462	0.581422
ACP5	5.95937e-18	4.47686e-09	0.790242	0.747186
LCK	6.11059e-18	3.00664e-07	0.710908	0.587746
GIMAP6	6.9938e-18	2.35799e-08	0.770918	0.69528
HLA-DOA	8.31857e-18	6.67996e-11	0.739133	0.782619
RASGRP3	9.36725e-18	0.000160181	1.01125	0.627275
SERPINE1	1.05484e-17	2.99722e-05	1.28242	0.87803
CCL18	1.13306e-17	8.69018e-08	1.60456	1.3976
RASGRP1	1.40133e-17	1.50088e-05	0.841859	0.599135
NCKAP1L	1.45817e-17	2.40093e-07	0.781738	0.659888
ITK	1.54637e-17	1.82317e-06	0.766409	0.59947
CEACAM6	1.64101e-17	1.21287e-11	0.772774	0.85884
ENPP2	1.77595e-17	5.61472e-08	1.19855	1.06593
WDFY4	1.85474e-17	1.74791e-07	0.832692	0.713512
TDO2	2.01561e-17	6.74841e-09	1.59449	1.51663
PIK3CD	2.36569e-17	2.32281e-06	0.773975	0.603203
DOC2B	2.60417e-17	0.000199907	0.964962	0.599385
EPSTI1	2.62435e-17	1.98303e-13	0.74637	0.908348
VCAM1	2.85084e-17	5.06706e-05	1.32057	0.891209
ST8SIA4	3.28917e-17	7.8048e-05	0.927447	0.61191
PRKAR2B	3.84801e-17	1.33995e-09	0.711565	0.715019
PTGDS	4.80132e-17	2.14627e-10	1.01784	1.07555
CYBB	1.26922e-16	4.63257e-09	0.915474	0.905112
ITGAM	1.30793e-16	1.47886e-08	0.858439	0.820565
MUC5B	1.56283e-16	2.98051e-06	0.94061	0.746581
VAV1	1.67281e-16	9.75249e-07	0.760282	0.632415
AIF1	1.69334e-16	2.60032e-09	0.805945	0.813662
MMP2	1.70629e-16	2.09089e-07	1.24644	1.09771
CD84	1.97183e-16	2.92501e-07	0.740624	0.64587
LYPD5	2.34485e-16	1.43132e-13	0.668252	0.846521
PRUNE2	2.47933e-16	9.68457e-13	0.593666	0.724667
COL1A2	2.69824e-16	6.26921e-05	1.34529	0.928504
DPYD	3.16717e-16	1.74581e-13	0.687518	0.871601
CXCL13	3.17904e-16	0.00860213	2.07813	0.975226
TRAF3IP3	3.18067e-16	1.41715e-06	0.847128	0.701141
VASN	3.72146e-16	3.4667e-09	0.633184	0.642135
L1TD1	3.72789e-16	6.36132e-19	1.00747	1.56027
CD19	3.96334e-16	0.000162623	1.04785	0.68764
FCGR2B	4.13276e-16	0.00026393	0.992488	0.631931
TNF	4.53902e-16	1.29253e-10	0.618157	0.684766
EDNRA	4.81404e-16	1.53329e-05	1.11731	0.838774
FCER1G	5.42387e-16	1.43269e-06	0.969379	0.808861
FAM20C	5.60722e-16	1.1003e-06	0.740357	0.624717
IGSF6	8.2898e-16	4.50871e-09	1.08569	1.10708
COL12A1	9.83501e-16	0.00142802	1.43267	0.816422
ADAMTS1	9.86005e-16	0.000318072	1.21527	0.775234
CTHRC1	1.03869e-15	1.16242e-06	1.1504	0.978448
EVI2A	1.06674e-15	1.93423e-06	0.889331	0.74131
ST3GAL4	1.20129e-15	1.58277e-11	0.754766	0.891722
GREM1	1.75119e-15	0.000255652	1.73583	1.13414
ATF3	3.08263e-15	6.40505e-07	0.810872	0.718707
KRT6B	3.21075e-15	0.000123732	1.04095	0.719062
CD37	3.24964e-15	0.000159847	1.11812	0.760386
CCR1	3.36004e-15	4.66084e-06	0.844864	0.691477
CCR2	3.40453e-15	4.6155e-08	0.849851	0.82663
CSTA	4.14111e-15	7.00046e-09	0.792512	0.819472
CCR7	4.15071e-15	1.04977e-06	1.17617	1.02813
TLR1	4.50694e-15	6.79099e-07	0.878172	0.781727
SMOC2	6.39054e-15	7.2888e-10	0.696603	0.772591
CAV1	7.70098e-15	0.00244666	1.18834	0.669163
C2CD4A	8.35424e-15	2.46801e-05	0.802056	0.616858
LRG1	8.6976e-15	9.94533e-10	0.582831	0.644584
HKDC1	1.20258e-14	1.28208e-07	0.81795	0.78631
FBLN5	1.32242e-14	1.16106e-05	0.761746	0.612714
COL3A1	1.43376e-14	2.29471e-05	1.37099	1.06846
FIBIN	1.79856e-14	4.02293e-05	0.777285	0.59049
CD52	2.22089e-14	4.69124e-06	0.958855	0.810869
SERPINF1	2.74872e-14	2.16202e-05	0.953422	0.753975
HCK	2.79085e-14	4.26784e-07	0.790885	0.739644
ALDH1A2	2.92964e-14	4.54757e-06	1.00526	0.855628
IL2RB	3.23174e-14	2.96566e-07	0.613205	0.582524
APOL4	3.9394e-14	3.66399e-12	0.640122	0.828689
SPARCL1	4.03792e-14	0.000748575	1.31113	0.839058
COL6A2	4.32396e-14	9.04277e-05	0.909527	0.670128
SIGLEC10	5.63012e-14	1.31412e-07	0.599031	0.591595
CMKLR1	5.98364e-14	2.08961e-07	0.608671	0.592239
MMP25	7.37759e-14	1.73827e-08	0.600196	0.635746
MRAP2	7.37759e-14	6.55212e-07	0.685716	0.64246
ENKUR	8.50543e-14	4.39539e-06	0.80136	0.696498
INHBA	1.62763e-13	3.52133e-06	1.28544	1.14187
FKBP10	1.63918e-13	4.68197e-05	0.757339	0.594034
PRRX1	1.81205e-13	0.00230927	1.16552	0.698745
CPVL	2.18847e-13	1.85107e-08	0.78998	0.852526
GNB4	2.49785e-13	6.9856e-05	0.856556	0.662068
CLIC2	2.6331e-13	5.34977e-06	0.810063	0.713134
IL18RAP	3.38992e-13	7.94444e-09	0.853601	0.953008
IFI44L	3.58465e-13	5.05688e-08	1.07873	1.13868
TNFRSF17	4.34243e-13	3.68834e-05	1.16833	0.946553
FFAR2	4.97018e-13	0.000905452	1.02842	0.68034
XDH	5.00868e-13	5.19427e-07	0.876334	0.859256
MME	5.083e-13	0.000204238	0.983513	0.722597
RUNX2	6.4391e-13	4.46101e-05	0.722865	0.583987
DCN	6.7901e-13	7.40254e-05	1.20708	0.948302
TFEC	8.90959e-13	3.43966e-06	0.685415	0.630183
OSM	9.51305e-13	0.000105509	1.1402	0.88356
CFP	9.67328e-13	5.90453e-08	0.715076	0.766027
HK2	1.24996e-12	1.74581e-13	0.618353	0.909707
TYROBP	1.38491e-12	6.9821e-06	0.650662	0.585088
CD163	2.16562e-12	3.13341e-05	0.951965	0.803776
HSD11B1	2.24242e-12	1.97711e-11	0.725346	0.979936
CD72	2.9208e-12	0.000198806	0.93766	0.715038
P2RY13	4.50087e-12	1.19576e-06	0.921159	0.914846
C3AR1	7.33133e-12	5.22964e-05	0.721923	0.607883
GPR171	9.70044e-12	2.93178e-07	0.649171	0.691103
TNFAIP6	1.19901e-11	3.27145e-06	1.39084	1.35376
TLR8	1.24994e-11	3.64511e-07	0.823901	0.8752
HAVCR2	1.47804e-11	1.62661e-05	0.654305	0.59511
GLT1D1	1.60947e-11	4.38509e-05	0.802482	0.694573
CD3G	2.63234e-11	7.74333e-05	0.694787	0.588553
EGFL6	3.73596e-11	4.97074e-05	0.792398	0.694092
NPTX2	4.84196e-11	0.000230555	0.96359	0.774774
IFNG	4.87517e-11	3.60373e-08	0.701783	0.831741
TRIM40	6.79076e-11	5.67e-06	0.895325	0.885286
IL6	9.81357e-11	4.8059e-06	1.20578	1.21148
MUC4	1.81062e-10	3.46044e-06	0.64909	0.671569
ALOX5AP	1.90102e-10	3.81256e-05	0.630786	0.583123
LUM	2.3198e-10	0.00297841	1.12268	0.768602
CD48	3.22733e-10	9.62666e-05	0.720464	0.640095
KCNJ15	4.04554e-10	1.38982e-05	0.705712	0.699882
CXCR1	4.1573e-10	0.00065822	0.88206	0.695013
MS4A1	5.50442e-10	0.0259378	1.49554	0.809039
APOBEC1	1.3316e-09	1.12129e-07	0.743415	0.922633
CCL19	1.74004e-09	0.00268673	1.12857	0.822168
C1QA	3.20133e-09	3.47454e-05	0.650011	0.650856
GPR84	8.84191e-09	5.05981e-05	0.708589	0.71548
CPA3	1.10766e-08	0.00100245	0.844719	0.706044
SPINK1	2.02238e-08	4.39186e-07	0.637052	0.815368
THBS2	2.73312e-08	0.000977202	0.82866	0.713732
MRC1	7.66639e-08	0.000290289	0.599234	0.58287
FCGR2A	3.83912e-06	0.00101162	0.665419	0.687271
TFPI2	2.5529e-05	0.0228946	0.8061	0.654699
HLA-DQA1	0.000402818	0.0286365	0.862813	0.801293
GAS1	0.000407863	0.00113859	0.581591	0.77189

## Sheet: Table S4
Supplementary Table 4 179 GR- and TET2-related CD DEGs
gene	logFC	AveExpr	t	P.Value	adj.P.Val	B	change
PSMB9	1.58844	8.32139	15.6616	1.07349e-42	1.78092e-39	38.7494	up
DUOX2	3.51707	9.82223	14.6799	1.0508e-38	1.30745e-35	34.8836	up
CDC25B	1.10019	6.9422	14.2525	5.48265e-37	4.54786e-34	33.3422	up
DUOXA2	2.95093	8.55165	14.21	8.11579e-37	6.15848e-34	33.2105	up
PSME2	0.993331	9.09967	14.2082	8.24926e-37	6.15848e-34	33.2105	up
UBE2L6	1.28933	7.53911	14.0761	2.78018e-36	1.88686e-33	32.7243	up
BIRC3	1.67012	8.27728	14.0081	5.18956e-36	3.22855e-33	32.491	up
DRAM1	1.45956	6.6463	13.1017	1.9427e-32	7.07473e-30	29.1503	up
S100P	1.84361	9.22316	12.9905	5.26299e-32	1.78595e-29	28.7481	up
NFKBIZ	1.14865	8.74068	12.8157	2.50657e-31	8.13599e-29	28.0896	up
HIF1A	0.966288	9.65192	12.7519	4.42203e-31	1.37553e-28	27.8615	up
CRELD2	0.896078	7.86215	12.118	1.17127e-28	2.96411e-26	25.5281	up
EIF4EBP2	-0.639605	8.59297	-12.0567	1.99794e-28	4.81149e-26	25.3177	down
CD40	0.928785	6.21078	11.9618	4.55364e-28	1.01625e-25	24.993	up
PIM3	0.802088	7.3405	11.9616	4.56022e-28	1.01625e-25	24.993	up
DEPDC7	-1.10759	4.95617	-11.7993	1.85347e-27	3.95346e-25	24.403	down
PTPN13	0.992189	5.06084	11.74	3.08745e-27	6.4026e-25	24.1936	up
XBP1	0.988483	9.55164	11.6737	5.45368e-27	1.07143e-24	23.97	up
NUCB2	0.91012	7.6782	11.5885	1.13066e-26	2.16434e-24	23.6647	up
MUC1	1.26164	9.90564	11.4932	2.5479e-26	4.69663e-24	23.3282	up
SOCS3	2.11596	6.99625	11.4326	4.26449e-26	7.58012e-24	23.1203	up
IRF9	0.698084	7.60834	11.4064	5.32997e-26	9.14733e-24	23.0387	up
TMEM38B	-0.874778	5.94872	-11.3975	5.7455e-26	9.63888e-24	23.016	down
CREB3L2	0.877772	7.96184	11.2616	1.81313e-25	2.91095e-23	22.536	up
USP30	-0.776523	6.79145	-11.2191	2.59435e-25	4.0775e-23	22.3896	down
LYZ	1.55141	10.3516	11.2014	3.01064e-25	4.68248e-23	22.3295	up
TAPBP	0.603425	9.26425	11.1674	4.00639e-25	5.98194e-23	22.2232	up
FUT8	0.876726	7.14416	11.1521	4.55838e-25	6.73873e-23	22.1714	up
NCOA7	1.00366	7.96934	10.9687	2.11111e-24	3.002e-22	21.5226	up
KDELR3	1.01804	8.3603	10.8516	5.58441e-24	7.3141e-22	21.1358	up
CXCL9	2.6284	7.10159	10.8439	5.94919e-24	7.72412e-22	21.1122	up
BAG3	0.717298	7.61212	10.7589	1.20123e-23	1.47013e-21	20.8326	up
CD55	1.28414	9.30331	10.5796	5.23948e-23	5.90428e-21	20.2288	up
ADM	1.27982	8.48879	10.5527	6.52587e-23	7.19511e-21	20.143	up
BHLHE40	0.843524	7.78543	10.5509	6.62154e-23	7.21651e-21	20.1417	up
PSMB10	0.702835	8.0431	10.4719	1.26025e-22	1.32513e-20	19.8777	up
ABCG2	-2.39153	6.21267	-10.3936	2.38026e-22	2.35362e-20	19.6283	down
FADS1	1.15426	5.72548	10.3461	3.49526e-22	3.34537e-20	19.4756	up
PDK2	-0.895201	6.39962	-10.2117	1.03176e-21	9.45103e-20	19.0245	down
ADAM9	0.740869	9.13996	10.1511	1.67703e-21	1.49938e-19	18.8241	up
TAP2	0.92961	7.47711	10.1447	1.76581e-21	1.56482e-19	18.8055	up
TMEM170A	-0.677218	8.26798	-10.1443	1.77118e-21	1.56482e-19	18.8055	down
OSBPL1A	-0.807619	6.36957	-10.0534	3.65747e-21	3.13849e-19	18.5033	down
ART3	1.13906	4.59147	9.95733	7.83928e-21	6.36132e-19	18.1965	up
DUSP10	0.663263	5.72873	9.70033	5.90702e-20	4.36622e-18	17.3599	up
WDR44	0.737827	6.55533	9.65412	8.46566e-20	6.15247e-18	17.211	up
SOCS1	1.2004	6.45005	9.65378	8.48844e-20	6.15247e-18	17.211	up
PSMB8	0.649661	8.06308	9.63517	9.80949e-20	7.04161e-18	17.1523	up
DDIT4	0.970282	6.90099	9.55617	1.80973e-19	1.24521e-17	16.9048	up
ICAM1	1.49381	6.76428	9.55357	1.8464e-19	1.26461e-17	16.898	up
PXMP2	-0.84462	7.86084	-9.53745	2.09135e-19	1.41294e-17	16.8499	down
VAMP5	0.680723	6.94412	9.4667	3.60793e-19	2.36272e-17	16.6266	up
NHEJ1	-0.713923	6.57848	-9.29762	1.31522e-18	7.91838e-17	16.1014	down
PCK1	-2.23965	7.18871	-9.28896	1.40481e-18	8.35666e-17	16.078	down
ITGB2	1.43173	7.29157	9.24202	2.00635e-18	1.17478e-16	15.93	up
MTHFD2	0.712651	7.57951	9.14628	4.13681e-18	2.33082e-16	15.6325	up
SLAMF8	1.20412	6.70681	9.14468	4.18712e-18	2.34149e-16	15.6305	up
SLC16A1	-1.2831	6.72227	-9.1044	5.669e-18	3.1119e-16	15.507	down
MT1M	-1.80258	6.96598	-9.03602	9.46529e-18	4.94148e-16	15.3061	down
GPCPD1	0.584692	7.26716	8.92555	2.15581e-17	1.05191e-15	14.978	up
PITPNC1	0.763945	7.15847	8.91234	2.37779e-17	1.15644e-15	14.9369	up
SEC14L1	0.743329	7.4596	8.8514	3.73245e-17	1.76918e-15	14.7522	up
IL17RB	-0.714146	6.23792	-8.81905	4.73824e-17	2.20395e-15	14.6568	down
SNX10	1.23159	5.98844	8.80883	5.10856e-17	2.36882e-15	14.6255	up
IER3	0.881098	8.66681	8.78039	6.29713e-17	2.88413e-15	14.54	up
ARHGEF37	-0.670363	6.08794	-8.72739	9.28839e-17	4.20258e-15	14.3765	down
MMP28	-0.664601	6.88162	-8.71561	1.01241e-16	4.55311e-15	14.3417	down
PDE8A	-0.634864	7.8747	-8.67927	1.32015e-16	5.88391e-15	14.2303	down
EFNA1	-0.932822	7.04012	-8.52486	4.04495e-16	1.71091e-14	13.7668	down
APOL6	0.589968	7.85345	8.44535	7.16351e-16	2.93037e-14	13.5331	up
CAMK2N1	-0.786669	9.47257	-8.4439	7.23837e-16	2.94599e-14	13.5308	down
RHOU	-0.890617	7.85641	-8.42486	8.29581e-16	3.35677e-14	13.4741	down
DNAJB9	0.800467	7.72568	8.42122	8.51488e-16	3.42684e-14	13.4651	up
MAFF	0.748738	6.99748	8.22411	3.45008e-15	1.27193e-13	12.8955	up
AHCYL2	-0.864722	9.53537	-8.21543	3.6675e-15	1.34214e-13	12.8722	down
LYPD5	0.846521	5.54214	8.20524	3.93994e-15	1.43132e-13	12.8443	up
IFI35	0.617969	7.43825	8.16102	5.3742e-15	1.87921e-13	12.726	up
SCPEP1	0.732345	6.61189	8.15617	5.55984e-15	1.93958e-13	12.7123	up
GXYLT2	-1.10924	5.1131	-8.15069	5.7773e-15	1.99678e-13	12.6997	down
STRADB	-0.690402	7.81636	-8.09371	8.6019e-15	2.88618e-13	12.5397	down
SLC25A20	-0.626468	7.1947	-8.09173	8.72144e-15	2.90271e-13	12.5372	down
CHDH	-0.673841	6.59246	-8.08854	8.91704e-15	2.95867e-13	12.5289	down
WNT5A	1.51771	6.19201	8.08602	9.07527e-15	2.99123e-13	12.5241	up
SOD2	1.0804	8.15998	8.03848	1.26285e-14	4.03759e-13	12.3939	up
FAM167B	0.67486	5.54463	7.89752	3.33797e-14	9.81088e-13	12.0083	up
PFKFB3	1.02562	7.62778	7.8718	3.9807e-14	1.143e-12	11.942	up
AIFM3	-0.690097	6.78364	-7.85479	4.47146e-14	1.26927e-12	11.8964	down
HSD17B11	-0.624368	9.3608	-7.75022	9.10262e-14	2.48013e-12	11.6055	down
RGS5	1.42792	7.77724	7.70682	1.22033e-13	3.24791e-12	11.4884	up
CLDN15	-0.588207	6.51807	-7.66304	1.6383e-13	4.28397e-12	11.3682	down
DYSF	0.933109	6.17017	7.63397	1.99087e-13	5.16969e-12	11.2865	up
PLS3	0.641765	7.0762	7.59415	2.59785e-13	6.6647e-12	11.1762	up
PLCD3	-0.600159	7.42333	-7.55285	3.42027e-13	8.62636e-12	11.0642	down
ZNF57	-0.585307	6.75957	-7.51614	4.36371e-13	1.08772e-11	10.9635	down
PDZK1IP1	1.07193	9.36743	7.50933	4.56508e-13	1.13037e-11	10.9468	up
ACADS	-0.604234	7.40141	-7.49303	5.08488e-13	1.24259e-11	10.9057	down
WIPF1	1.02005	7.42622	7.32078	1.57299e-12	3.53709e-11	10.4514	up
ELOVL5	0.970176	7.3609	7.28376	2.00017e-12	4.44412e-11	10.3522	up
MT1E	-0.806798	8.80116	-7.25494	2.41017e-12	5.26885e-11	10.2783	down
SERPING1	1.17212	7.26582	7.25265	2.44599e-12	5.33934e-11	10.2725	up
FHL2	0.622307	8.4643	7.25155	2.46343e-12	5.36956e-11	10.2701	up
ADAM19	0.814917	6.6469	7.13003	5.37437e-12	1.0888e-10	9.96305	up
BCL6	1.03152	6.70113	7.08019	7.38037e-12	1.45762e-10	9.83635	up
CEBPB	0.655985	7.85683	6.96956	1.48377e-11	2.80078e-10	9.55272	up
ENTPD1	0.866569	7.24769	6.9133	2.10976e-11	3.87464e-10	9.41177	up
SLC22A23	-0.632575	7.59928	-6.85184	3.09188e-11	5.51552e-10	9.25841	down
CREB3L3	-0.984121	4.58961	-6.8451	3.22383e-11	5.71675e-10	9.24285	down
RETSAT	-0.631882	8.66005	-6.8201	3.76287e-11	6.57116e-10	9.18236	down
ACSL4	1.09131	6.0762	6.76419	5.30944e-11	8.99832e-10	9.04584	up
FOXP2	-0.698005	5.0433	-6.75664	5.56149e-11	9.36174e-10	9.02864	down
ISG15	0.626973	6.77357	6.73544	6.33282e-11	1.05767e-09	8.97565	up
PHLDA1	0.951111	7.09045	6.67506	9.15259e-11	1.47898e-09	8.83004	up
GYPC	0.642259	6.07501	6.52357	2.28106e-10	3.4161e-09	8.46647	up
SLCO4A1	0.717082	6.33184	6.51096	2.45949e-10	3.64312e-09	8.43853	up
TRPV2	0.634087	5.39714	6.47954	2.96575e-10	4.3456e-09	8.36195	up
SLC23A3	-0.669403	5.57218	-6.47761	3.00006e-10	4.38296e-09	8.35823	down
ACP5	0.747186	7.154	6.47338	3.07632e-10	4.47686e-09	8.34903	up
EAF2	0.760606	6.52041	6.4712	3.11646e-10	4.52645e-09	8.34424	up
GRK5	0.652515	6.95619	6.45556	3.41959e-10	4.89172e-09	8.31054	up
PRKCH	0.615047	6.90899	6.42399	4.12215e-10	5.81718e-09	8.23529	up
TMEM45A	0.956193	4.97534	6.41695	4.2972e-10	6.03588e-09	8.21926	up
PLK3	0.59887	5.93127	6.39001	5.0366e-10	6.97601e-09	8.15639	up
FGFR2	-0.708405	6.38363	-6.34226	6.66509e-10	9.02235e-09	8.04468	down
SMPDL3A	-0.701708	8.85181	-6.29994	8.53196e-10	1.13136e-08	7.9464	down
BST2	0.800053	6.14051	6.28164	9.48989e-10	1.24009e-08	7.90655	up
EGR2	0.755616	5.90322	6.22094	1.34842e-09	1.71201e-08	7.76649	up
MMP25	0.635746	6.10427	6.21771	1.37376e-09	1.73827e-08	7.75988	up
ITGAL	0.686657	6.19699	6.19996	1.52154e-09	1.9123e-08	7.71844	up
APPL2	-0.6106	7.80094	-6.12681	2.31275e-09	2.81891e-08	7.54992	down
ENPP1	-0.645312	6.01497	-6.12282	2.36595e-09	2.87671e-08	7.5411	down
GSDMB	0.663102	8.41051	6.07772	3.05675e-09	3.61544e-08	7.44184	up
HLA-DOB	0.978624	5.80341	6.06061	3.3673e-09	3.95883e-08	7.40243	up
FRMD1	-0.610632	5.08294	-6.04155	3.74988e-09	4.36055e-08	7.36046	down
CLEC7A	0.789538	5.17875	6.0374	3.83866e-09	4.45339e-08	7.35131	up
CFP	0.766027	5.54404	5.98224	5.23186e-09	5.90453e-08	7.22881	up
CD300A	0.603681	6.35351	5.96996	5.60368e-09	6.30035e-08	7.20064	up
VIL1	-0.654532	9.0757	-5.93759	6.71199e-09	7.48445e-08	7.12584	down
CD3D	0.613712	6.39363	5.87483	9.5022e-09	1.02661e-07	6.98859	up
ANGPTL4	0.762659	5.91661	5.8477	1.10332e-08	1.17669e-07	6.92934	up
VIM	0.881618	8.48087	5.80977	1.35839e-08	1.42731e-07	6.84548	up
CYP1B1	0.747654	4.43502	5.79838	1.44565e-08	1.51155e-07	6.82058	up
VCAN	0.951845	6.86199	5.7038	2.41506e-08	2.40395e-07	6.61907	up
LCK	0.587746	6.11338	5.65824	3.08497e-08	3.00664e-07	6.52192	up
SPHK1	0.616335	5.23496	5.64532	3.30576e-08	3.20301e-07	6.49444	up
PKIB	-0.771926	7.91012	-5.64324	3.34281e-08	3.23681e-07	6.48988	down
S100A4	0.65259	6.69119	5.64256	3.35496e-08	3.24436e-07	6.48887	up
RND1	0.644002	6.15533	5.62419	3.70073e-08	3.56257e-07	6.44824	up
ATF3	0.718707	6.5513	5.50453	6.96658e-08	6.40505e-07	6.19348	up
SLC22A4	-0.601301	5.26452	-5.40262	1.18393e-07	1.04168e-06	5.98227	down
LGALS1	0.724004	8.12477	5.39802	1.21239e-07	1.06047e-06	5.9745	up
CSF3R	0.82155	6.2305	5.27523	2.27197e-07	1.87522e-06	5.72695	up
FGF9	-0.58061	4.66056	-5.23902	2.72816e-07	2.21743e-06	5.65415	down
ITPR1	0.622697	5.43752	5.2156	3.06937e-07	2.46789e-06	5.60767	up
RGS2	0.768898	7.72127	5.17844	3.69708e-07	2.92382e-06	5.53405	up
SH3BP5	0.610489	6.27472	5.15498	4.15574e-07	3.25889e-06	5.48693	up
ENKUR	0.696498	4.39572	5.08847	5.77574e-07	4.39539e-06	5.357	up
ALDH1A2	0.855628	5.33825	5.08114	5.98789e-07	4.54757e-06	5.34222	up
DOK3	0.588343	6.10367	5.0422	7.24755e-07	5.40255e-06	5.2674	up
ROBO1	0.811918	6.53189	5.01914	8.11057e-07	5.99796e-06	5.222	up
EMP3	0.589411	6.59638	4.98843	9.41569e-07	6.8746e-06	5.16275	up
FOS	0.999114	8.03975	4.98762	9.45241e-07	6.89804e-06	5.16127	up
TYROBP	0.585088	7.9833	4.98482	9.58163e-07	6.9821e-06	5.15601	up
ANXA6	0.597849	7.07291	4.91537	1.33869e-06	9.53169e-06	5.02083	up
FOXQ1	0.611464	6.53142	4.89387	1.48362e-06	1.04589e-05	4.98051	up
CD79A	0.895045	7.75918	4.75431	2.86531e-06	1.92625e-05	4.71529	up
SERPINF1	0.753975	6.67612	4.7264	3.26237e-06	2.16202e-05	4.66514	up
PBLD	-0.686315	7.50668	-4.70845	3.54535e-06	2.33197e-05	4.63228	down
C2CD4A	0.616858	6.13611	4.69484	3.77533e-06	2.46801e-05	4.60765	up
SELENBP1	-0.626555	9.66567	-4.63602	4.94547e-06	3.15694e-05	4.50073	down
SATB2	-0.602125	8.95334	-4.63508	4.96681e-06	3.16785e-05	4.49924	down
TNFRSF17	0.946553	6.28373	4.59719	5.90145e-06	3.68834e-05	4.43317	up
FKBP10	0.594034	5.25141	4.53602	7.77663e-06	4.68197e-05	4.32957	up
C3AR1	0.607883	6.62198	4.50711	8.85091e-06	5.22964e-05	4.28153	up
PNLIPRP2	-0.999401	5.12866	-4.44673	1.15711e-05	6.63217e-05	4.17834	down
CD3G	0.588553	5.49604	4.40667	1.38002e-05	7.74333e-05	4.11107	up
SLC6A19	-0.630682	5.44385	-4.38879	1.49231e-05	8.31406e-05	4.08019	down
PYY	-0.591587	7.06844	-3.89736	0.000115599	0.000526863	3.2783	down
FCGR2A	0.687271	4.95771	3.71013	0.000239235	0.00101162	2.99498	up
IL11	0.635819	5.57388	3.30797	0.00103271	0.00372719	2.42862	up

## Sheet: Table S5
Supplementary Table 5 401 GR- and TET2-related UC DEGs
gene	logFC	AveExpr	t	P.Value	adj.P.Val	B	change
FUT8	1.48532	7.14416	25.8039	1.86373e-84	3.47842e-81	80.4586	up
DUOXA2	3.87924	8.55165	25.5126	2.71351e-83	4.05154e-80	79.3924	up
DUOX2	4.28105	9.82223	24.4044	7.80952e-79	8.96954e-76	75.0472	up
BHLHE40	1.33666	7.78543	22.8343	1.95819e-72	1.27121e-69	68.8958	up
CD55	2.02807	9.30331	22.82	2.24213e-72	1.39488e-69	68.8555	up
CDC25B	1.28849	6.9422	22.7971	2.78452e-72	1.66303e-69	68.7791	up
HIF1A	1.21871	9.65192	21.9657	7.37232e-69	3.23753e-66	65.4898	up
TMEM38B	-1.21635	5.94872	-21.6445	1.56623e-67	5.99624e-65	64.2221	down
KDELR3	1.46697	8.3603	21.3562	2.44545e-66	8.90563e-64	63.0503	up
PITPNC1	1.33325	7.15847	21.2431	7.1992e-66	2.44298e-63	62.6121	up
CREB3L2	1.20938	7.96184	21.1912	1.18093e-65	3.91833e-63	62.4069	up
USP30	-1.0646	6.79145	-21.0071	6.85565e-65	2.00709e-62	61.6974	down
PCK1	-3.70264	7.18871	-20.9737	9.43728e-65	2.70977e-62	61.5671	down
NFKBIZ	1.37496	8.74068	20.9516	1.1652e-64	3.28257e-62	61.4838	up
EIF4EBP2	-0.810929	8.59297	-20.8773	2.37275e-64	6.44137e-62	61.191	down
PXMP2	-1.34387	7.86084	-20.7254	1.01425e-63	2.70425e-61	60.568	down
BIRC3	1.79633	8.27728	20.5775	4.17761e-63	1.05722e-60	59.9758	up
FGFR2	-1.67895	6.38363	-20.5293	6.62553e-63	1.62173e-60	59.79	down
S100P	2.0896	9.22316	20.1093	3.70973e-61	7.91284e-59	58.1017	up
PSMB9	1.48378	8.32139	19.9806	1.27404e-60	2.53637e-58	57.5958	up
CRELD2	1.06964	7.86215	19.756	1.09877e-59	2.00069e-57	56.6988	up
PDK2	-1.2667	6.39962	-19.7346	1.34961e-59	2.42784e-57	56.6148	down
XBP1	1.22183	9.55164	19.7073	1.7546e-59	3.11879e-57	56.506	up
RHOU	-1.52115	7.85641	-19.6525	2.96662e-59	5.09133e-57	56.2932	down
TMEM170A	-0.951745	8.26798	-19.471	1.69422e-58	2.69111e-56	55.5701	down
DUSP10	0.966784	5.72873	19.311	7.87029e-58	1.12992e-55	54.947	up
NUCB2	1.11	7.6782	19.303	8.50224e-58	1.20902e-55	54.9176	up
AIFM3	-1.24038	6.78364	-19.2821	1.03893e-57	1.46342e-55	54.8346	down
DRAM1	1.57059	6.6463	19.2551	1.34605e-57	1.82708e-55	54.7382	up
ABCG2	-3.23421	6.21267	-19.197	2.3531e-57	3.10922e-55	54.5073	down
ACADS	-1.13097	7.40141	-19.1548	3.5272e-57	4.61971e-55	54.3354	down
DDIT4	1.41141	6.90099	18.9851	1.79924e-56	2.25752e-54	53.6464	up
TMEM184B	0.738808	7.35736	18.6806	3.34957e-55	3.84711e-53	52.4149	up
MT1M	-2.69669	6.96598	-18.4624	2.71902e-54	2.85899e-52	51.5438	down
SEPHS2	-0.781532	8.29401	-18.4293	3.73681e-54	3.82153e-52	51.4178	down
SEC13	0.636619	8.36514	18.4235	3.95162e-54	4.01372e-52	51.3965	up
PLS3	1.13116	7.0762	18.2811	1.54858e-53	1.50142e-51	50.8235	up
NHEJ1	-1.02563	6.57848	-18.2425	2.2434e-53	2.12002e-51	50.6737	down
OSBPL1A	-1.06857	6.36957	-18.167	4.62651e-53	4.2641e-51	50.3702	down
PIM3	0.886568	7.3405	18.0573	1.3248e-52	1.17742e-50	49.9291	up
PSME2	0.923399	9.09967	18.0389	1.58143e-52	1.39718e-50	49.8547	up
SOCS3	2.43274	6.99625	17.9519	3.64004e-52	3.12146e-50	49.5056	up
ADAM9	0.950618	9.13996	17.7891	1.73319e-51	1.42188e-49	48.8471	up
ADM	1.56717	8.48879	17.6485	6.664e-51	5.1823e-49	48.2855	up
CNN2	0.757858	7.57712	17.6349	7.58437e-51	5.86747e-49	48.2315	up
SELENBP1	-1.73712	9.66567	-17.5546	1.63658e-50	1.23462e-48	47.9085	down
MIF	0.791927	8.57773	17.4914	2.99717e-50	2.2264e-48	47.6524	up
SETD7	0.77353	7.64404	17.4136	6.30583e-50	4.5705e-48	47.34	up
PFKFB3	1.66104	7.62778	17.4118	6.41703e-50	4.62863e-48	47.3345	up
PHLDA1	1.81304	7.09045	17.3783	8.84177e-50	6.2865e-48	47.2016	up
UBE2L6	1.1613	7.53911	17.3156	1.60922e-49	1.10725e-47	46.9558	up
PTPN13	1.06921	5.06084	17.2787	2.28948e-49	1.56092e-47	46.8066	up
ZCCHC14	-0.797918	6.40444	-17.207	4.54341e-49	3.00166e-47	46.5226	down
SUOX	-0.709238	6.29559	-17.1368	8.88751e-49	5.78568e-47	46.2376	down
MRPL34	-0.692346	6.92359	-17.0726	1.63996e-48	1.04642e-46	45.9803	down
P4HB	0.645163	10.3065	17.0464	2.10699e-48	1.31629e-46	45.8806	up
BTBD3	-0.822906	7.23489	-17.0111	2.94994e-48	1.79778e-46	45.7453	down
SEC14L1	1.0425	7.4596	16.9544	5.06816e-48	3.06367e-46	45.5138	up
HSDL2	-0.870805	6.98582	-16.9224	6.87231e-48	4.10442e-46	45.3867	down
DEPDC7	-1.16086	4.95617	-16.8902	9.34521e-48	5.51515e-46	45.2584	down
SLC16A1	-1.73835	6.72227	-16.8463	1.42047e-47	8.22056e-46	45.0851	down
MAST2	-0.835035	7.1613	-16.822	1.79086e-47	1.03241e-45	44.9861	down
NCOA7	1.12694	7.96934	16.8208	1.81054e-47	1.03974e-45	44.9831	up
ZNF57	-0.958734	6.75957	-16.8145	1.92208e-47	1.09956e-45	44.9588	down
DNAJC10	0.810479	8.00055	16.7773	2.73976e-47	1.55541e-45	44.8082	up
GLTP	-0.777979	8.13148	-16.7652	3.07476e-47	1.73242e-45	44.7613	down
BAG3	0.81788	7.61212	16.7546	3.40242e-47	1.90983e-45	44.719	up
PKIB	-1.67275	7.91012	-16.7016	5.63321e-47	3.11517e-45	44.5065	down
TRAK2	-0.694422	7.60823	-16.6421	9.92609e-47	5.35041e-45	44.2716	down
CAMK2N1	-1.13178	9.47257	-16.5916	1.60537e-46	8.41044e-45	44.0752	down
FADS1	1.35405	5.72548	16.5763	1.85687e-46	9.66024e-45	44.015	up
DGKD	-0.718815	7.32506	-16.5586	2.19784e-46	1.1355e-44	43.9448	down
PLOD1	0.711466	6.81581	16.5577	2.21526e-46	1.14055e-44	43.9429	up
C6orf136	-0.79632	7.25119	-16.5279	2.94258e-46	1.50465e-44	43.8226	down
ADD3	-0.725226	8.43012	-16.4841	4.4627e-46	2.25873e-44	43.6461	down
PBLD	-1.75873	7.50668	-16.4789	4.68769e-46	2.36459e-44	43.6262	down
MTHFD2	0.937858	7.57951	16.4392	6.83677e-46	3.39136e-44	43.4696	up
LYZ	1.66338	10.3516	16.4026	9.67765e-46	4.78467e-44	43.3201	up
CD40	0.931832	6.21078	16.3905	1.08544e-45	5.33116e-44	43.2732	up
PCK2	-0.857718	7.36362	-16.3622	1.42018e-45	6.92965e-44	43.1593	down
HSD17B11	-0.962559	9.3608	-16.3184	2.15307e-45	1.03701e-43	42.9842	down
AHCYL2	-1.25689	9.53537	-16.3089	2.3543e-45	1.12667e-43	42.9482	down
PGM1	-0.801989	8.01257	-16.2825	3.02709e-45	1.43484e-43	42.8432	down
PDE8A	-0.870953	7.8747	-16.2619	3.67726e-45	1.73751e-43	42.7601	down
PTPN21	-0.830381	6.34624	-16.1855	7.59314e-45	3.4777e-43	42.4587	down
DENND4C	-0.668964	7.7916	-16.1571	9.93126e-45	4.5071e-43	42.3461	down
PDZK1IP1	1.68777	9.36743	16.1481	1.08146e-44	4.89312e-43	42.3104	up
OAF	-0.784892	7.29167	-16.1424	1.14206e-44	5.13619e-43	42.2894	down
SLC35F2	-0.637535	7.01176	-15.8887	1.25898e-43	5.20717e-42	41.2834	down
EAPP	-0.725511	7.37792	-15.8093	2.66601e-43	1.08464e-41	40.9647	down
KLHL8	-0.726417	6.44943	-15.7966	3.00479e-43	1.21584e-41	40.9151	down
MGAT4B	-0.785871	8.23512	-15.7738	3.72589e-43	1.49546e-41	40.8252	down
ARHGEF3	0.882207	6.6398	15.7346	5.39429e-43	2.1364e-41	40.6703	up
SLCO4A1	1.2677	6.33184	15.7206	6.15631e-43	2.42533e-41	40.6152	up
PEX11A	-0.874107	6.53028	-15.62	1.58814e-42	6.12725e-41	40.2127	down
GPCPD1	0.740808	7.26716	15.445	8.23925e-42	3.04505e-40	39.5164	up
SLC25A20	-0.875006	7.1947	-15.4358	8.98747e-42	3.2971e-40	39.4819	down
MYLIP	-0.741116	7.06635	-15.4247	9.97189e-42	3.64035e-40	39.4389	down
CCDC167	0.732909	6.03468	15.3892	1.39172e-41	5.03143e-40	39.2983	up
ART3	1.28772	4.59147	15.3743	1.60144e-41	5.77564e-40	39.2384	up
IRF9	0.688745	7.60834	15.37	1.66685e-41	5.96829e-40	39.2241	up
MIER1	-0.666312	7.70874	-15.23	6.19459e-41	2.14597e-39	38.6684	down
HYOU1	0.640176	8.2346	15.2064	7.72769e-41	2.64638e-39	38.5773	up
STRADB	-0.946601	7.81636	-15.1561	1.23809e-40	4.16349e-39	38.3805	down
EFNA1	-1.21327	7.04012	-15.1433	1.3953e-40	4.67112e-39	38.3306	down
AKAP1	-0.885569	8.28832	-15.14	1.43896e-40	4.80651e-39	38.3182	down
DNAJB9	1.04917	7.72568	15.0749	2.64727e-40	8.6114e-39	38.0649	up
IGSF9	-1.16533	6.45862	-15.0563	3.14916e-40	1.01996e-38	37.9914	down
ZNF608	-0.643779	5.83679	-14.9929	5.69155e-40	1.81582e-38	37.7409	down
CAT	-0.684031	8.57633	-14.9633	7.50842e-40	2.37517e-38	37.6243	down
TAPBP	0.588813	9.26425	14.8827	1.59117e-39	4.97026e-38	37.3036	up
ECH1	-0.734506	9.21462	-14.8581	2.00087e-39	6.1853e-38	37.2086	down
FRMD1	-1.0974	5.08294	-14.8289	2.62744e-39	8.02257e-38	37.0957	down
ABCD3	-0.822037	8.37316	-14.8274	2.66386e-39	8.11715e-38	37.0906	down
CPT2	-0.809078	7.15044	-14.7905	3.75654e-39	1.13083e-37	36.9466	down
CA12	-1.02918	10.0476	-14.778	4.21983e-39	1.26519e-37	36.8978	down
TRAF3IP2	-0.601806	7.41542	-14.7726	4.43552e-39	1.32719e-37	36.8771	down
SEC22C	0.765464	6.44302	14.7123	7.77093e-39	2.29304e-37	36.6396	up
HOXA5	-1.05973	6.3473	-14.6685	1.16803e-38	3.39297e-37	36.4694	down
SLC22A23	-0.990956	7.59928	-14.6597	1.26748e-38	3.66049e-37	36.4365	down
SLC44A1	-0.759983	9.35574	-14.658	1.28756e-38	3.7113e-37	36.4305	down
ARHGEF37	-0.824142	6.08794	-14.6538	1.33812e-38	3.8496e-37	36.4146	down
GXYLT2	-1.4549	5.1131	-14.6008	2.18869e-38	6.23651e-37	36.2051	down
RGS5	1.97761	7.77724	14.5776	2.71528e-38	7.66386e-37	36.1156	up
RETSAT	-0.987936	8.66005	-14.5633	3.10048e-38	8.70175e-37	36.0604	down
HIVEP2	0.797021	6.52224	14.5121	4.98356e-38	1.38308e-36	35.8592	up
CYP27A1	-0.945183	6.05903	-14.4468	9.12052e-38	2.49869e-36	35.6023	down
RGS2	1.56939	7.72127	14.4357	1.01042e-37	2.75303e-36	35.5602	up
CLCN2	-1.06337	6.90401	-14.4113	1.26582e-37	3.41155e-36	35.467	down
MT1E	-1.17195	8.80116	-14.393	1.49886e-37	3.99632e-36	35.3983	down
PPM1A	-0.634403	7.56113	-14.3828	1.64731e-37	4.38431e-36	35.3581	down
SATB2	-1.36703	8.95334	-14.3722	1.81732e-37	4.81108e-36	35.3178	down
TAP2	0.962125	7.47711	14.3398	2.45106e-37	6.4205e-36	35.1924	up
LETM1	-0.704573	7.25727	-14.3367	2.52251e-37	6.59608e-36	35.1807	down
IFT74	-0.82441	5.99206	-14.2898	3.88835e-37	1.00173e-35	34.9992	down
ICAM1	1.633	6.76428	14.2637	4.94538e-37	1.26654e-35	34.8974	up
SOCS1	1.29845	6.45005	14.2617	5.0387e-37	1.28823e-35	34.89	up
TSHZ1	-0.68276	6.57772	-14.2507	5.57423e-37	1.42029e-35	34.8476	down
CHCHD10	-0.649473	8.57436	-14.1935	9.44859e-37	2.3631e-35	34.6265	down
SFXN1	-0.659858	7.2137	-14.1842	1.02928e-36	2.56564e-35	34.5908	down
RNF138	-0.654368	7.40265	-14.1409	1.53243e-36	3.7882e-35	34.4216	down
MKKS	-0.614246	6.47684	-14.1303	1.68942e-36	4.14881e-35	34.3821	down
TNFRSF12A	0.958939	6.9649	14.0972	2.29057e-36	5.55202e-35	34.2555	up
APPL2	-1.02206	7.80094	-14.0065	5.26774e-36	1.25844e-34	33.9002	down
MAP3K5	0.650504	7.83441	13.9197	1.16703e-35	2.73546e-34	33.563	up
IER3	1.02222	8.66681	13.9126	1.24502e-35	2.90914e-34	33.5362	up
ENTPD1	1.27615	7.24769	13.9047	1.33848e-35	3.12262e-34	33.5055	up
FOXP2	-1.05112	5.0433	-13.8963	1.44484e-35	3.36027e-34	33.4736	down
PEX26	-0.835275	7.38222	-13.8773	1.71891e-35	3.96678e-34	33.4016	down
PLCD3	-0.807167	7.42333	-13.8734	1.78169e-35	4.10531e-34	33.3867	down
SLC20A2	-0.891744	6.86932	-13.8544	2.11949e-35	4.86863e-34	33.3126	down
PGD	0.58943	8.34714	13.7633	4.87064e-35	1.08543e-33	32.9644	up
CEBPB	0.943944	7.85683	13.6972	8.89699e-35	1.9622e-33	32.7073	up
LRP6	-0.659014	6.6464	-13.6455	1.42527e-34	3.09762e-33	32.509	down
PPA1	0.58667	9.50754	13.6129	1.91633e-34	4.11693e-33	32.3854	up
ITGAV	0.695922	8.46557	13.5742	2.72558e-34	5.78064e-33	32.238	up
ANXA2	0.615016	10.0577	13.5724	2.77069e-34	5.86796e-33	32.2315	up
MUC1	1.09085	9.90564	13.572	2.77851e-34	5.87619e-33	32.2309	up
SLC23A3	-1.02237	5.57218	-13.5117	4.80373e-34	1.00314e-32	31.9986	down
ENPP1	-1.03901	6.01497	-13.4641	7.39589e-34	1.52947e-32	31.8155	down
CITED2	-0.698706	7.4719	-13.4208	1.09536e-33	2.24345e-32	31.6491	down
MPST	-0.634822	7.38013	-13.4052	1.26127e-33	2.56566e-32	31.5908	down
HSPA5	0.626602	9.95985	13.4045	1.26834e-33	2.57655e-32	31.589	up
GRK5	0.988468	6.95619	13.3562	1.96446e-33	3.93708e-32	31.4048	up
SPHK2	-0.614932	6.27046	-13.3041	3.14193e-33	6.19712e-32	31.2078	down
HIGD1A	-0.770157	9.59572	-13.1972	8.24006e-33	1.57532e-31	30.8026	down
ATP8A1	-0.702098	7.44986	-13.1784	9.75852e-33	1.86085e-31	30.7303	down
PSMB10	0.646329	8.0431	13.1523	1.2331e-32	2.33945e-31	30.6309	up
ACAA1	-0.637155	7.8953	-13.1495	1.26469e-32	2.39634e-31	30.6205	down
ELOVL5	1.28087	7.3609	13.1336	1.45908e-32	2.75069e-31	30.5606	up
TMEM45A	1.4253	4.97534	13.0637	2.73318e-32	5.07576e-31	30.2945	up
MYCBP2	0.749847	7.27445	13.0353	3.5252e-32	6.49811e-31	30.1872	up
NAPEPLD	-0.886358	7.33717	-13.0324	3.61881e-32	6.66245e-31	30.1764	down
ITGB2	1.47628	7.29157	13.0152	4.22081e-32	7.74213e-31	30.1111	up
ACO2	-0.621851	8.92695	-12.9288	9.14069e-32	1.62863e-30	29.7882	down
GCNT2	-1.10742	5.19118	-12.8691	1.5569e-31	2.72522e-30	29.5646	down
MMP28	-0.718025	6.88162	-12.8603	1.68429e-31	2.93444e-30	29.5325	down
MAFF	0.856772	6.99748	12.8529	1.80012e-31	3.13259e-30	29.5041	up
MRPL35	-0.687596	7.48327	-12.7785	3.49017e-31	5.95563e-30	29.2251	down
HOXB5	-0.796198	6.30691	-12.7207	5.83419e-31	9.85411e-30	29.0064	down
CXCL16	0.673586	7.23142	12.6806	8.32498e-31	1.38728e-29	28.8578	up
KLK1	-0.964366	7.58301	-12.6586	1.01182e-30	1.67303e-29	28.7765	down
CMTM4	-0.815347	8.36374	-12.6146	1.494e-30	2.44861e-29	28.6111	down
ADAM19	1.05415	6.6469	12.5967	1.7517e-30	2.85843e-29	28.5439	up
CHDH	-0.767548	6.59246	-12.5833	1.972e-30	3.20741e-29	28.4938	down
AP1AR	-0.706738	6.61255	-12.5783	2.06074e-30	3.34081e-29	28.4761	down
CENPV	-0.685898	6.94784	-12.5457	2.74967e-30	4.43841e-29	28.3528	down
ASPH	0.690373	7.78787	12.5263	3.2617e-30	5.23098e-29	28.2814	up
IL17RB	-0.742627	6.23792	-12.5251	3.29763e-30	5.27726e-29	28.2776	down
CRAT	-0.603336	7.23549	-12.4343	7.33993e-30	1.14997e-28	27.9393	down
BCL6	1.32341	6.70113	12.4062	9.3977e-30	1.4586e-28	27.8361	up
KPNA2	0.686416	8.36429	12.4043	9.55696e-30	1.48178e-28	27.8292	up
ABCA5	-0.706779	6.83806	-12.3663	1.33531e-29	2.05541e-28	27.6871	down
CXCL9	2.18924	7.10159	12.3357	1.74627e-29	2.66874e-28	27.5737	up
LAMB2	0.851037	6.16147	12.3315	1.81218e-29	2.7638e-28	27.5585	up
OPN3	-0.818734	7.40677	-12.3143	2.10609e-29	3.19574e-28	27.4954	down
GRB10	0.762618	5.98737	12.2675	3.17436e-29	4.71605e-28	27.3264	up
WNT5A	1.6809	6.19201	12.231	4.36843e-29	6.4388e-28	27.1912	up
VIL1	-0.984037	9.0757	-12.1918	6.15785e-29	8.97004e-28	27.0472	down
WIPF1	1.24349	7.42622	12.1886	6.33048e-29	9.21251e-28	27.0356	up
EMB	1.14374	6.41219	12.1314	1.04295e-28	1.4916e-27	26.8263	up
PCSK6	-0.76099	6.74983	-12.1155	1.19717e-28	1.70068e-27	26.7694	down
RIMKLA	-0.735023	6.53162	-12.1069	1.29092e-28	1.82733e-27	26.7382	down
STX2	0.740039	5.52545	12.0976	1.39951e-28	1.97692e-27	26.704	up
MLXIP	-0.645315	8.54037	-12.0529	2.06373e-28	2.88516e-27	26.5398	down
FGD5	0.72536	5.37949	12.0391	2.32811e-28	3.24566e-27	26.4887	up
EAF2	1.03173	6.52041	11.9886	3.60833e-28	4.94729e-27	26.3056	up
MARVELD3	-0.80586	7.40634	-11.981	3.85442e-28	5.27501e-27	26.2778	down
WDR44	0.66623	6.55533	11.9058	7.3914e-28	9.88898e-27	26.0048	up
SDF2L1	0.695443	7.07066	11.9039	7.51022e-28	1.00267e-26	25.9988	up
VAMP5	0.624792	6.94412	11.867	1.03382e-27	1.36723e-26	25.8642	up
SERPINB6	0.631525	8.4722	11.8642	1.05869e-27	1.39887e-26	25.8542	up
TMEM37	-1.28941	7.61369	-11.8335	1.38038e-27	1.80952e-26	25.7424	down
SLC41A1	0.697484	6.01932	11.8176	1.58266e-27	2.06742e-26	25.6846	up
STARD10	-0.78675	8.4083	-11.7617	2.56104e-27	3.30215e-26	25.4812	down
PRKCH	0.82297	6.90899	11.7397	3.09482e-27	3.95962e-26	25.4023	up
CFLAR	0.618476	8.05496	11.7367	3.1761e-27	4.05666e-26	25.3918	up
ACSL4	1.38439	6.0762	11.7194	3.68463e-27	4.67022e-26	25.3307	up
PMAIP1	0.795979	5.73447	11.7172	3.75258e-27	4.75231e-26	25.3231	up
ANGPTL4	1.11843	5.91661	11.7122	3.91858e-27	4.94158e-26	25.3061	up
PRR5L	-0.80533	7.67154	-11.7062	4.1243e-27	5.18786e-26	25.285	down
SLC39A4	-0.620001	7.08706	-11.6728	5.4935e-27	6.86964e-26	25.1631	down
BCL2L11	-0.607842	6.8727	-11.6137	9.11567e-27	1.12484e-25	24.9489	down
NDRG1	-0.677217	9.07855	-11.6065	9.69463e-27	1.19234e-25	24.9236	down
DYSF	1.03725	6.17017	11.5898	1.11815e-26	1.36845e-25	24.8638	up
GMNN	-0.596262	6.72704	-11.548	1.59764e-26	1.93153e-25	24.7141	down
EPB41L3	-0.80043	6.94352	-11.5363	1.7655e-26	2.1293e-25	24.6718	down
NR5A2	-0.714069	7.339	-11.5331	1.81366e-26	2.18562e-25	24.6604	down
ANP32E	0.619433	6.68311	11.5194	2.0391e-26	2.44938e-25	24.6109	up
PLK3	0.78921	5.93127	11.501	2.38405e-26	2.84088e-25	24.5465	up
TGFA	-0.642863	6.4919	-11.4858	2.71496e-26	3.21979e-25	24.4922	down
HOXA7	-0.733568	6.83628	-11.4842	2.75088e-26	3.2572e-25	24.4872	down
HSPA13	0.811848	6.77833	11.4835	2.76827e-26	3.27261e-25	24.4851	up
PRKACB	-0.653661	8.86696	-11.4439	3.87528e-26	4.52046e-25	24.3448	down
CTH	-0.652074	5.85649	-11.41	5.16792e-26	5.97231e-25	24.2239	down
DEGS1	0.7277	6.70053	11.3897	6.13895e-26	7.05082e-25	24.1518	up
PANK1	-0.795306	7.02338	-11.3891	6.17286e-26	7.08432e-25	24.1497	down
NQO2	0.791429	6.68412	11.3694	7.29481e-26	8.32076e-25	24.0798	up
SLC25A37	0.749608	7.36934	11.3526	8.40562e-26	9.52956e-25	24.0209	up
SLC1A4	0.64045	6.85352	11.3501	8.58528e-26	9.72586e-25	24.0121	up
TLE2	-0.757011	6.50805	-11.3243	1.06847e-25	1.19769e-24	23.9217	down
IFI35	0.627159	7.43825	11.3118	1.18726e-25	1.32786e-24	23.8768	up
FHL2	0.710341	8.4643	11.3049	1.2579e-25	1.40267e-24	23.853	up
CD79A	1.55672	7.75918	11.2935	1.38565e-25	1.53823e-24	23.813	up
SNX10	1.15127	5.98844	11.2462	2.06435e-25	2.27139e-24	23.6437	up
SEMA6D	-0.803692	7.49288	-11.24	2.17634e-25	2.39109e-24	23.6214	down
SLC16A4	1.10592	5.06363	11.2178	2.62252e-25	2.86026e-24	23.5436	up
PBX1	-0.584815	7.12866	-11.2146	2.69508e-25	2.93725e-24	23.5321	down
CD68	0.620617	7.39911	11.211	2.77657e-25	3.02164e-24	23.5198	up
GNAI2	0.761237	7.23257	11.2096	2.81105e-25	3.05249e-24	23.5153	up
CNNM4	-0.849887	8.27677	-11.2059	2.90027e-25	3.14252e-24	23.5027	down
CLDN15	-0.629698	6.51807	-11.2041	2.94236e-25	3.18581e-24	23.4968	down
SMPDL3A	-0.913276	8.85181	-11.1984	3.08691e-25	3.33025e-24	23.4775	down
SLC16A5	-0.657696	6.75197	-11.1595	4.2811e-25	4.54955e-24	23.342	down
TST	-0.804467	10.0053	-11.1422	4.95106e-25	5.24285e-24	23.2804	down
AGMAT	-0.695126	7.24387	-11.1193	6.00083e-25	6.30531e-24	23.2003	down
FXYD3	-0.919811	10.9684	-11.1164	6.14755e-25	6.45039e-24	23.1904	down
MAP4K1	0.714186	5.83658	11.105	6.76282e-25	7.07608e-24	23.1502	up
MBOAT1	-0.661458	7.98935	-11.0713	8.96767e-25	9.2919e-24	23.0319	down
TNIK	-0.637173	6.76604	-11.0698	9.07871e-25	9.40043e-24	23.0269	down
HOXA2	-0.842146	4.77605	-11.0386	1.17832e-24	1.21334e-23	22.916	down
GGH	-0.654633	7.33424	-11.0164	1.41817e-24	1.45032e-23	22.8385	down
TRPV2	0.788157	5.39714	10.9998	1.62962e-24	1.65975e-23	22.78	up
VIM	1.21999	8.48087	10.9802	1.91796e-24	1.9481e-23	22.7104	up
SERPING1	1.29174	7.26582	10.9164	3.26311e-24	3.2787e-23	22.4843	up
HOMER1	0.698086	4.29633	10.913	3.35668e-24	3.36592e-23	22.4729	up
ERBB3	-0.869336	8.40169	-10.9121	3.38101e-24	3.38804e-23	22.4701	down
LGALS1	1.07151	8.12477	10.911	3.41242e-24	3.41722e-23	22.4663	up
LYST	0.604844	6.54289	10.9092	3.46262e-24	3.46518e-23	22.4603	up
NR4A2	1.20686	6.41606	10.9087	3.47744e-24	3.47767e-23	22.4587	up
SLC41A2	-0.586982	7.8003	-10.7564	1.22624e-23	1.18582e-22	21.926	down
SCPEP1	0.706909	6.61189	10.7525	1.26638e-23	1.22305e-22	21.9126	up
LATS2	0.665732	6.88497	10.7445	1.3531e-23	1.30343e-22	21.8849	up
RND1	0.897178	6.15533	10.7011	1.93453e-23	1.83743e-22	21.7358	up
KLF7	0.706126	6.20493	10.6914	2.09418e-23	1.98655e-22	21.7019	up
HCST	0.608823	6.35816	10.6831	2.24176e-23	2.12249e-22	21.6732	up
FAM167B	0.668108	5.54463	10.6782	2.33388e-23	2.20692e-22	21.6562	up
SERINC2	-0.684886	8.56217	-10.6587	2.7393e-23	2.56429e-22	21.591	down
KRT7	0.923681	5.58451	10.6109	4.05358e-23	3.75227e-22	21.4257	up
PNP	0.646328	8.1971	10.5948	4.62362e-23	4.25618e-22	21.371	up
ZBTB10	-0.635299	6.36364	-10.5623	6.03113e-23	5.51107e-22	21.2588	down
SH3BP5	0.910831	6.27472	10.5042	9.69337e-23	8.7663e-22	21.0572	up
SLAMF8	1.011	6.70681	10.4864	1.12082e-22	1.01117e-21	20.9952	up
ANXA6	0.931317	7.07291	10.4577	1.4144e-22	1.26382e-21	20.8983	up
TSC22D3	0.872682	7.15984	10.4497	1.50942e-22	1.3431e-21	20.8719	up
HLA-DOB	1.23537	5.80341	10.449	1.51919e-22	1.35098e-21	20.8694	up
ECM1	0.588216	5.94157	10.4224	1.88412e-22	1.66658e-21	20.7782	up
VCAN	1.27284	6.86199	10.4171	1.96799e-22	1.73665e-21	20.7603	up
S100A4	0.881154	6.69119	10.4055	2.16157e-22	1.90185e-21	20.7208	up
FOS	1.52054	8.03975	10.367	2.95255e-22	2.58257e-21	20.5879	up
SYTL1	0.654518	6.09368	10.3362	3.78782e-22	3.2958e-21	20.482	up
ZFP36L1	0.643592	7.91369	10.3121	4.60199e-22	3.98333e-21	20.3998	up
CD3D	0.785158	6.39363	10.2651	6.71908e-22	5.75244e-21	20.2401	up
EMP3	0.883508	6.59638	10.2125	1.02563e-21	8.67139e-21	20.0619	up
PCCA	-0.801166	7.24419	-10.1894	1.23381e-21	1.03553e-20	19.9848	down
VAV3	-0.724311	7.4879	-10.118	2.18565e-21	1.80398e-20	19.7438	down
EGR2	0.895055	5.90322	10.0642	3.35555e-21	2.73332e-20	19.5633	up
GYPC	0.725227	6.07501	10.0606	3.45285e-21	2.80951e-20	19.5514	up
HOOK1	-0.732145	7.36137	-10.0456	3.89263e-21	3.15702e-20	19.5007	down
MEI1	0.616823	6.11489	10.0454	3.89861e-21	3.16016e-20	19.5003	up
PLXND1	0.672684	6.3857	10.0388	4.10652e-21	3.32328e-20	19.4784	up
CASP6	-0.630891	7.58183	-10.0301	4.40016e-21	3.55513e-20	19.4491	down
SOD2	0.980596	8.15998	9.96445	7.40955e-21	5.86596e-20	19.2317	up
TMC4	-0.686936	8.34448	-9.95477	7.99987e-21	6.31321e-20	19.1997	down
BST2	0.927641	6.14051	9.94741	8.47962e-21	6.66365e-20	19.1763	up
CREB3L3	-1.04548	4.58961	-9.93167	9.60317e-21	7.51099e-20	19.1243	down
CRIP2	0.833645	6.20953	9.87488	1.50337e-20	1.16184e-19	18.9349	up
PLXNA1	0.588824	6.66421	9.8338	2.07712e-20	1.58962e-19	18.7987	up
MYO1A	-0.879046	8.50685	-9.83123	2.11957e-20	1.62128e-19	18.7901	down
PDK1	0.700375	7.45091	9.80962	2.5116e-20	1.90746e-19	18.7195	up
SPHK1	0.783775	5.23496	9.80481	2.6082e-20	1.97681e-19	18.704	up
HOXA6	-0.680772	5.64733	-9.79202	2.88358e-20	2.17338e-19	18.6629	down
CD300A	0.724712	6.35351	9.78825	2.97001e-20	2.23627e-19	18.6505	up
FOXQ1	0.895079	6.53142	9.78404	3.06962e-20	2.30778e-19	18.6368	up
FGF9	-0.790239	4.66056	-9.73867	4.37849e-20	3.25736e-19	18.4871	down
SLC12A4	0.581977	5.54643	9.69081	6.36205e-20	4.6794e-19	18.3298	up
BTG2	0.719817	8.17147	9.66518	7.76769e-20	5.68805e-19	18.245	up
CSF3R	1.09628	6.2305	9.61399	1.15635e-19	8.35695e-19	18.078	up
KLF5	-0.683861	9.62468	-9.59338	1.35677e-19	9.77227e-19	18.01	down
BEST4	-1.40971	6.11379	-9.56521	1.68751e-19	1.20961e-18	17.9174	down
YBX2	-0.600571	6.99659	-9.5448	1.97589e-19	1.41361e-18	17.8497	down
AP1S3	0.638103	5.38188	9.53521	2.12794e-19	1.5173e-18	17.8189	up
ROBO1	1.12815	6.53189	9.52492	2.30379e-19	1.64034e-18	17.7851	up
DOK3	0.813678	6.10367	9.52395	2.32112e-19	1.65189e-18	17.782	up
NVL	-0.617307	5.9937	-9.48992	3.01756e-19	2.12324e-18	17.673	down
ITGAL	0.769482	6.19699	9.48906	3.03759e-19	2.13633e-18	17.6703	up
ITPR1	0.822976	5.43752	9.41434	5.39323e-19	3.71946e-18	17.4295	up
CLEC7A	0.900039	5.17875	9.39968	6.03458e-19	4.14073e-18	17.3829	up
RGMB	-0.669714	6.85574	-9.38503	6.75064e-19	4.61395e-18	17.3359	down
HOXA3	-0.672667	5.99333	-9.35332	8.60235e-19	5.83826e-18	17.2337	down
ACP5	0.790242	7.154	9.35057	8.7848e-19	5.95937e-18	17.2248	up
LCK	0.710908	6.11338	9.34717	9.01589e-19	6.11059e-18	17.2139	up
NID1	0.892102	6.46794	9.30284	1.26399e-18	8.5012e-18	17.0705	up
ZFP36	0.607921	8.5997	9.28687	1.42736e-18	9.56549e-18	17.0193	up
IGFLR1	0.694649	6.18299	9.27596	1.55073e-18	1.03737e-17	16.9841	up
MR1	0.623212	5.79172	9.26806	1.64666e-18	1.09907e-17	16.959	up
SEMA4G	-0.651933	7.5289	-9.25817	1.7751e-18	1.18006e-17	16.9281	down
C1orf54	0.593266	5.83783	9.18607	3.06407e-18	1.99606e-17	16.6998	up
TSPAN5	0.679419	5.25086	9.08281	6.66658e-18	4.25743e-17	16.3709	up
SYTL3	0.67039	5.53266	9.07445	7.09819e-18	4.53113e-17	16.3438	up
DQX1	-0.72037	6.51506	-9.03936	9.23201e-18	5.83587e-17	16.2339	down
DEPTOR	-0.602494	6.20089	-9.0275	1.00879e-17	6.36611e-17	16.1961	down
EPN3	-0.590115	6.6122	-9.01008	1.14898e-17	7.21728e-17	16.1416	down
NEDD4L	-0.769842	7.97439	-8.96038	1.66416e-17	1.03531e-16	15.9849	down
GRHL3	0.683648	4.70473	8.85997	3.50343e-17	2.12987e-16	15.6716	up
SFMBT2	0.657159	5.92312	8.84959	3.78276e-17	2.29408e-16	15.6394	up
LYPD5	0.668252	5.54214	8.84646	3.87117e-17	2.34485e-16	15.6299	up
FCHSD2	0.651209	6.63234	8.81498	4.88245e-17	2.93833e-16	15.5319	up
SNCAIP	0.657501	5.18301	8.81396	4.91919e-17	2.95686e-16	15.5292	up
MT2A	-0.783356	9.94175	-8.8077	5.15128e-17	3.09387e-16	15.5095	down
PIP5K1B	-0.61651	8.22661	-8.68732	1.24485e-16	7.25765e-16	15.1392	down
HYAL1	0.710258	6.28258	8.67339	1.37799e-16	8.0151e-16	15.0961	up
WNK4	-0.618969	6.4112	-8.6378	1.78557e-16	1.02817e-15	14.9879	down
TFAP2C	0.653525	4.76629	8.56134	3.10836e-16	1.76066e-15	14.7543	up
DENND1C	0.605133	6.06408	8.55624	3.22507e-16	1.82538e-15	14.7386	up
ATF3	0.810872	6.5513	8.48196	5.50831e-16	3.08263e-15	14.5111	up
GGT6	-0.612424	7.91461	-8.47316	5.86783e-16	3.27769e-15	14.4844	down
SLC22A4	-0.688044	5.26452	-8.44315	7.27761e-16	4.02452e-15	14.3953	down
CGN	-0.650412	7.65677	-8.3581	1.33594e-15	7.23766e-15	14.1404	down
CDHR5	-0.806195	8.27642	-8.35638	1.35238e-15	7.32403e-15	14.1353	down
S100A2	0.592425	4.61371	8.34887	1.4266e-15	7.712e-15	14.1128	up
C2CD4A	0.802056	6.13611	8.33711	1.551e-15	8.35424e-15	14.0781	up
IRAK2	0.637947	6.01642	8.33259	1.60164e-15	8.6115e-15	14.0649	up
SLC6A19	-0.869397	5.44385	-8.26281	2.62588e-15	1.38884e-14	13.8573	down
PNLIPRP2	-1.34502	5.12866	-8.17347	4.92512e-15	2.55781e-14	13.5921	down
SERPINF1	0.953422	6.67612	8.1627	5.31113e-15	2.74872e-14	13.5609	up
ALDH1A2	1.00526	5.33825	8.15326	5.67444e-15	2.92964e-14	13.5332	up
BAIAP2L1	0.644462	8.67857	8.12165	7.07831e-15	3.63558e-14	13.4394	up
MYO1G	0.633606	5.75904	8.05774	1.10478e-14	5.59547e-14	13.2522	up
MMP25	0.600196	6.10427	8.01707	1.4649e-14	7.37759e-14	13.1321	up
ENKUR	0.80136	4.39572	7.99595	1.69528e-14	8.50543e-14	13.0703	up
FMNL1	0.613064	5.95142	7.95632	2.22858e-14	1.11064e-13	12.9544	up
HSPA6	0.685874	5.77523	7.95623	2.22985e-14	1.11091e-13	12.9543	up
FKBP10	0.757339	5.25141	7.89822	3.32206e-14	1.63918e-13	12.7854	up
LOXL1	0.870724	5.87536	7.85562	4.44615e-14	2.16663e-13	12.6642	up
TNFRSF17	1.16833	6.28373	7.74975	9.13217e-14	4.34243e-13	12.3623	up
CFP	0.715076	5.54404	7.62689	2.08742e-13	9.67328e-13	12.0144	up
TYROBP	0.650662	7.9833	7.5711	3.02935e-13	1.38491e-12	11.8586	up
ZG16	-1.1706	10.3362	-7.49581	4.99216e-13	2.2519e-12	11.6475	down
IKZF3	0.81335	6.19143	7.4913	5.1431e-13	2.31929e-12	11.6346	up
C3AR1	0.721923	6.62198	7.31045	1.68221e-12	7.33133e-12	11.1348	up
NID2	0.620218	6.16993	7.26207	2.3016e-12	9.92639e-12	11.0032	up
PRR15L	-0.607336	9.38945	-7.2619	2.30404e-12	9.93405e-12	11.0029	down
ARHGAP29	0.732304	5.29673	7.17208	4.10728e-12	1.73237e-11	10.7614	up
CD180	0.892209	5.79681	7.1564	4.5412e-12	1.90945e-11	10.7191	up
CD3G	0.694787	5.49604	7.10481	6.31156e-12	2.63234e-11	10.5797	up
GJC1	0.607829	4.89768	7.03206	1.00103e-11	4.11972e-11	10.3851	up
IGF2BP3	0.696273	3.3068	6.91222	2.12408e-11	8.54612e-11	10.0682	up
CLMP	0.609108	5.69421	6.83918	3.3441e-11	1.32548e-10	9.87763	up
DUSP1	0.589765	9.01237	6.37789	5.40835e-10	1.9562e-09	8.70859	up
MAFB	0.633949	6.58648	6.32975	7.1706e-10	2.5749e-09	8.58924	up
NFE2	0.623116	3.61401	6.13888	2.15892e-09	7.45485e-09	8.12756	up
KCNA3	0.652614	5.11033	6.09512	2.76955e-09	9.48228e-09	8.02309	up
FADS2	0.64044	6.3312	6.03654	3.85725e-09	1.30833e-08	7.88328	up
NAPSB	0.639241	6.09185	5.81801	1.2985e-08	4.21568e-08	7.37513	up
PLTP	0.637216	6.35117	5.81693	1.30619e-08	4.23972e-08	7.37266	up
CCDC88A	0.617383	4.9107	5.73907	1.99598e-08	6.38295e-08	7.19498	up
FOSB	0.896753	5.83832	5.48458	7.73345e-08	2.35505e-07	6.628	up
LAMA4	0.598468	6.4561	5.47225	8.24804e-08	2.50767e-07	6.60073	up
PYY	-0.594268	7.06844	-5.34699	1.57618e-07	4.68991e-07	6.32884	down
FCGR2A	0.665419	4.95771	4.90605	1.39978e-06	3.83912e-06	5.41577	up

## Sheet: Table S6
Supplementary Table 6 GO results after rrvgo of GR- and TET2-related CD and UC DEGs
a）GO result of CD
ONTOLOGY	ID	Description	GeneRatio	BgRatio	pvalue	p.adjust	qvalue	geneID	Count	-log10.qvalue
BP	GO:0002697	regulation of immune effector process	21/172	379/18903	3.89548e-11	1.21072e-07	9.47217e-08	NFKBIZ/CD40/XBP1/CD55/TAP2/DUSP10/ICAM1/PCK1/ITGB2/SLAMF8/DNAJB9/WNT5A/SERPING1/BCL6/ACP5/BST2/APPL2/CLEC7A/CFP/CD300A/TYROBP	21	7.02355
BP	GO:0050727	regulation of inflammatory response	17/172	414/18903	2.4931e-07	0.000258286	0.000202073	DUOXA2/BIRC3/NFKBIZ/SOCS3/DUSP10/SLAMF8/CAMK2N1/IFI35/WNT5A/BCL6/CEBPB/CREB3L3/ACP5/SPHK1/LGALS1/SERPINF1/C2CD4A	17	3.69449
BP	GO:0042554	superoxide anion generation	6/172	43/18903	2.39843e-06	0.000966936	0.000756493	DUOX2/ITGB2/SOD2/ACP5/CLEC7A/TYROBP	6	3.12119
BP	GO:0045444	fat cell differentiation	12/172	244/18903	2.49666e-06	0.000966936	0.000756493	XBP1/DUSP10/SOCS1/PSMB8/WNT5A/SOD2/CEBPB/GRK5/EGR2/ENPP1/RGS2/IL11	12	3.12119
BP	GO:0002237	response to molecule of bacterial origin	14/172	360/18903	5.60956e-06	0.00144707	0.00113213	XBP1/CXCL9/CD55/ADM/ADAM9/TAP2/DUSP10/WNT5A/SOD2/CEBPB/ACP5/FGFR2/VIM/FOS	14	2.9461
BP	GO:0007159	leukocyte cell-cell adhesion	15/172	414/18903	6.05275e-06	0.00144707	0.00113213	NFKBIZ/XBP1/CD55/DUSP10/SOCS1/ICAM1/PCK1/ITGB2/BCL6/CEBPB/ITGAL/HLA-DOB/CD300A/LCK/LGALS1	15	2.9461
BP	GO:0002696	positive regulation of leukocyte activation	15/172	450/18903	1.62646e-05	0.00250178	0.0019573	NFKBIZ/CD40/XBP1/CD55/DUSP10/SOCS1/PCK1/ITGB2/WNT5A/BCL6/HLA-DOB/CLEC7A/LCK/LGALS1/TYROBP	15	2.70834
BP	GO:0032868	response to insulin	11/172	269/18903	3.69201e-05	0.00478116	0.00374059	EIF4EBP2/XBP1/SOCS3/ADM/PDK2/SOCS1/PCK1/EGR2/APPL2/ENPP1/FOS	11	2.42706
BP	GO:0045766	positive regulation of angiogenesis	9/172	187/18903	5.50477e-05	0.00518449	0.00405615	HIF1A/CD40/XBP1/ADM/WNT5A/ANGPTL4/CYP1B1/SPHK1/C3AR1	9	2.39189
BP	GO:0045926	negative regulation of growth	10/172	249/18903	9.72852e-05	0.00687187	0.00537629	HIF1A/DUSP10/MT1M/WNT5A/MT1E/BCL6/EAF2/BST2/ENPP1/RGS2	10	2.26952
BP	GO:0031667	response to nutrient levels	14/172	474/18903	0.000114723	0.00734301	0.00574488	XBP1/NUCB2/ADM/FADS1/PDK2/PCK1/SLC16A1/SOD2/APPL2/CYP1B1/ATF3/ALDH1A2/FOS/SLC6A19	14	2.24072
BP	GO:0001892	embryonic placenta development	6/172	87/18903	0.000142795	0.00837374	0.00655129	HIF1A/SOCS3/ADM/PLCD3/CEBPB/FGFR2	6	2.18367
BP	GO:0001503	ossification	13/172	429/18903	0.000157243	0.00905023	0.00708055	HIF1A/TMEM38B/SNX10/WNT5A/FHL2/CEBPB/ISG15/FGFR2/EGR2/ENPP1/VCAN/FGF9/SATB2	13	2.14993
BP	GO:0001667	ameboidal-type cell migration	14/172	492/18903	0.00016904	0.00938171	0.00733989	S100P/HIF1A/CD40/FUT8/ADAM9/DUSP10/EFNA1/WNT5A/APPL2/VIL1/CYP1B1/ROBO1/ANXA6/SERPINF1	14	2.13431
BP	GO:0070243	regulation of thymocyte apoptotic process	3/172	13/18903	0.000197992	0.010256	0.00802387	HIF1A/EFNA1/WNT5A	3	2.09562
BP	GO:0001933	negative regulation of protein phosphorylation	11/172	338/18903	0.000277225	0.0134627	0.0105327	PTPN13/SOCS3/DUSP10/SOCS1/DDIT4/CAMK2N1/ENPP1/CD300A/PKIB/RGS2/SH3BP5	11	1.97746
BP	GO:0050764	regulation of phagocytosis	6/172	103/18903	0.000358744	0.0159258	0.0124597	DYSF/APPL2/CLEC7A/CFP/CD300A/SPHK1	6	1.90449
BP	GO:0042445	hormone metabolic process	9/172	241/18903	0.000371875	0.0160526	0.0125589	DUOX2/DUOXA2/HIF1A/ADM/SCPEP1/HSD17B11/RETSAT/CYP1B1/ALDH1A2	9	1.90105
BP	GO:0061180	mammary gland epithelium development	5/172	69/18903	0.000413186	0.0171248	0.0133978	HIF1A/WNT5A/CEBPB/FGFR2/ROBO1	5	1.87297
BP	GO:0045730	respiratory burst	4/172	39/18903	0.000424634	0.0171327	0.013404	CD55/DUSP10/SLAMF8/CLEC7A	4	1.87277
BP	GO:0060537	muscle tissue development	12/172	422/18903	0.000498993	0.0182455	0.0142746	VAMP5/GPCPD1/MAFF/WNT5A/FHL2/FGFR2/EGR2/ATF3/FGF9/RGS2/ALDH1A2/FOS	12	1.84544
BP	GO:0010631	epithelial cell migration	11/172	366/18903	0.000541793	0.0186583	0.0145975	S100P/HIF1A/CD40/ADAM9/DUSP10/EFNA1/WNT5A/VIL1/CYP1B1/ROBO1/SERPINF1	11	1.83572
BP	GO:0052548	regulation of endopeptidase activity	12/172	428/18903	0.000565307	0.0187422	0.0146631	PSMB9/PSME2/BIRC3/PSMB8/EFNA1/SERPING1/BST2/CLEC7A/VIL1/LCK/ROBO1/SERPINF1	12	1.83377
BP	GO:0030282	bone mineralization	6/172	123/18903	0.000918464	0.0243982	0.0190882	HIF1A/TMEM38B/SNX10/ISG15/FGFR2/ENPP1	6	1.71924
BP	GO:0002053	positive regulation of mesenchymal cell proliferation	3/172	23/18903	0.00114671	0.0282854	0.0221294	WNT5A/FGFR2/FGF9	3	1.65503
BP	GO:0048565	digestive tract development	6/172	132/18903	0.00132346	0.0311615	0.0243796	HIF1A/WNT5A/FGFR2/FGF9/ALDH1A2/PYY	6	1.61297
BP	GO:0001819	positive regulation of cytokine production	12/172	486/18903	0.00168323	0.0353479	0.0276548	HIF1A/CD40/XBP1/CD55/WNT5A/CEBPB/ISG15/CLEC7A/CYP1B1/SPHK1/TYROBP/C3AR1	12	1.55823
BP	GO:0046686	response to cadmium ion	4/172	60/18903	0.00217101	0.0419099	0.0327887	MT1M/SOD2/MT1E/FOS	4	1.48428
BP	GO:0031341	regulation of cell killing	5/172	102/18903	0.00240798	0.0438474	0.0343045	CD55/TAP2/ICAM1/CLEC7A/TYROBP	5	1.46465
BP	GO:0046685	response to arsenic-containing substance	3/172	32/18903	0.00302467	0.0494289	0.0386713	CYP1B1/ATF3/SERPINF1	3	1.41261
CC	GO:0019774	proteasome core complex, beta-subunit complex	3/178	11/19869	0.000110644	0.0120918	0.0107378	PSMB9/PSMB10/PSMB8	3	1.96909
CC	GO:0030667	secretory granule membrane	11/178	313/19869	0.000125589	0.0120918	0.0107378	CD55/ITGB2/BST2/MMP25/ITGAL/CD300A/ITPR1/DOK3/TYROBP/C3AR1/FCGR2A	11	1.96909
CC	GO:0062023	collagen-containing extracellular matrix	13/178	433/19869	0.000149281	0.0120918	0.0107378	ICAM1/MMP28/WNT5A/SERPING1/ADAM19/FGFR2/CFP/ANGPTL4/VCAN/S100A4/LGALS1/ANXA6/SERPINF1	13	1.96909
b) GO results of UC
ONTOLOGY	ID	Description	GeneRatio	BgRatio	pvalue	p.adjust	qvalue	geneID	Count	-log10.qvalue
BP	GO:0034620	cellular response to unfolded protein	12/385	100/18903	8.99513e-07	0.00106618	0.000891212	CREB3L2/XBP1/DNAJC10/BAG3/DNAJB9/HSPA5/BCL2L11/HSPA13/CTH/CREB3L3/ATF3/HSPA6	12	3.05002
BP	GO:0002697	regulation of immune effector process	24/385	379/18903	1.02446e-06	0.00106618	0.000891212	CD55/PCK1/NFKBIZ/XBP1/DUSP10/MIF/CD40/DNAJB9/TAP2/ICAM1/APPL2/SPHK2/ITGB2/BCL6/WNT5A/SERPING1/SLAMF8/BST2/CD300A/CLEC7A/ACP5/MR1/CFP/TYROBP	24	3.05002
BP	GO:0007389	pattern specification process	27/385	472/18903	1.54781e-06	0.00106618	0.000891212	BHLHE40/HIF1A/FGFR2/HOXA5/SATB2/IFT74/TSHZ1/MKKS/LRP6/CITED2/HOXB5/ASPH/WNT5A/PCSK6/HOXA7/PRKACB/PBX1/HOXA2/EGR2/HOXA6/BTG2/ROBO1/HOXA3/GRHL3/ALDH1A2/ENKUR/MAFB	27	3.05002
BP	GO:0045444	fat cell differentiation	18/385	244/18903	2.85022e-06	0.00141025	0.00117882	XBP1/DUSP10/PEX11A/RGS2/SOCS1/MKKS/CEBPB/ENPP1/GRK5/NAPEPLD/WNT5A/NR4A2/ZFP36L1/EGR2/SOD2/KLF5/ZFP36/MAFB	18	2.92855
BP	GO:0032868	response to insulin	19/385	269/18903	2.87476e-06	0.00141025	0.00117882	PCK1/EIF4EBP2/PDK2/XBP1/SOCS3/ADM/PCK2/DENND4C/CAT/SOCS1/APPL2/ENPP1/GRB10/CFLAR/GNAI2/FOS/ZFP36L1/EGR2/BAIAP2L1	19	2.92855
BP	GO:0048732	gland development	25/385	441/18903	4.45149e-06	0.0018398	0.00153787	HIF1A/PCK1/FGFR2/XBP1/PCK2/HOXA5/CLCN2/CEBPB/CITED2/MPST/ACO2/WNT5A/EAF2/CFLAR/BCL2L11/TGFA/PBX1/PLXND1/SOD2/PLXNA1/ROBO1/HOXA3/SERPINF1/ALDH1A2/MAFB	25	2.81308
BP	GO:0046459	short-chain fatty acid metabolic process	5/385	15/18903	8.66701e-06	0.00325643	0.00272202	PCK1/ACADS/PCK2/CRAT/PCCA	5	2.56511
BP	GO:0001666	response to hypoxia	19/385	296/18903	1.13997e-05	0.00387505	0.00323912	HIF1A/DDIT4/ADM/P4HB/PLOD1/HYOU1/CAT/CITED2/CFLAR/PMAIP1/ANGPTL4/NDRG1/PLK3/NR4A2/FOS/ZFP36L1/SOD2/PDK1/ITPR1	19	2.48957
BP	GO:0048706	embryonic skeletal system development	12/385	128/18903	1.21886e-05	0.00387505	0.00323912	FGFR2/HOXA5/SATB2/HOXB5/WNT5A/HOXA7/PBX1/HOXA2/HOXA6/FGF9/HOXA3/HYAL1	12	2.48957
BP	GO:0002237	response to molecule of bacterial origin	21/385	360/18903	1.70268e-05	0.00439823	0.00367644	CD55/FGFR2/XBP1/DUSP10/ADAM9/ADM/MIF/PCK2/TAP2/CEBPB/CXCL9/WNT5A/CD68/VIM/FOS/SOD2/ACP5/ZFP36/IRAK2/LOXL1/CD180	21	2.43457
BP	GO:0042554	superoxide anion generation	7/385	43/18903	2.35758e-05	0.00487193	0.0040724	DUOX2/ITGB2/GNAI2/SOD2/CLEC7A/ACP5/TYROBP	7	2.39015
BP	GO:0070227	lymphocyte apoptotic process	9/385	80/18903	3.5584e-05	0.00507804	0.00424468	HIF1A/MIF/EFNA1/TRAF3IP2/BCL6/WNT5A/BCL2L11/TSC22D3/CD3G	9	2.37215
BP	GO:0031667	response to nutrient levels	24/385	474/18903	4.37099e-05	0.00531333	0.00444136	PCK1/PDK2/XBP1/NUCB2/ADM/SLC16A1/FADS1/PCK2/CAT/MKKS/APPL2/MAP3K5/HSPA5/PMAIP1/SLC39A4/CD68/GNAI2/FOS/SOD2/ZFP36/WNK4/ATF3/SLC6A19/ALDH1A2	24	2.35248
BP	GO:0045926	negative regulation of growth	16/385	249/18903	5.51042e-05	0.00599331	0.00500975	HIF1A/DUSP10/MT1M/RGS2/MT1E/ENPP1/CITED2/SPHK2/BCL6/WNT5A/EAF2/SEMA6D/BST2/SEMA4G/MT2A/HYAL1	16	2.30018
BP	GO:0045785	positive regulation of cell adhesion	24/385	484/18903	6.06577e-05	0.00626746	0.00523891	CD55/PCK1/NFKBIZ/XBP1/DUSP10/ADAM9/P4HB/IFT74/SOCS1/ITGAV/CITED2/ITGB2/GCNT2/ADAM19/BCL6/LAMB2/WNT5A/LGALS1/PNP/HLA-DOB/VAV3/LCK/NID1/HYAL1	24	2.28076
BP	GO:0070528	protein kinase C signaling	6/385	35/18903	6.75938e-05	0.00649687	0.00543067	DGKD/CD40/SPHK2/WNT5A/PRKCH/WNK4	6	2.26515
BP	GO:0032528	microvillus organization	5/385	24/18903	0.000105467	0.00908114	0.00759084	VIL1/TNIK/MYO1A/KLF5/CDHR5	5	2.11971
BP	GO:0001889	liver development	11/385	141/18903	0.000149934	0.0112992	0.00944488	PCK1/XBP1/PCK2/CEBPB/CITED2/MPST/ACO2/CFLAR/TGFA/SOD2/ALDH1A2	11	2.0248
BP	GO:0050900	leukocyte migration	20/385	398/18903	0.000207816	0.0141464	0.0118248	CNN2/MIF/ICAM1/ITGB2/MMP28/CXCL16/CXCL9/WNT5A/HOXA7/LYST/SLAMF8/ECM1/VAV3/CD300A/CSF3R/ITGAL/LCK/MYO1G/C3AR1/DUSP1	20	1.9272
BP	GO:0001933	negative regulation of protein phosphorylation	18/385	338/18903	0.000212213	0.0141464	0.0118248	DUSP10/DDIT4/SOCS3/PTPN13/DNAJC10/PKIB/CAMK2N1/RGS2/SOCS1/LRP6/ENPP1/PRR5L/LATS2/SH3BP5/CD300A/DEPTOR/WNK4/DUSP1	18	1.9272
BP	GO:0060485	mesenchyme development	17/385	313/18903	0.000251377	0.0159837	0.0133606	HIF1A/FGFR2/EFNA1/HOXA5/LRP6/CITED2/GCNT2/WNT5A/SEMA6D/ERBB3/ANXA6/S100A4/ZFP36L1/FGF9/ROBO1/SEMA4G/ALDH1A2	17	1.87417
BP	GO:0021602	cranial nerve morphogenesis	5/385	30/18903	0.000319835	0.0185161	0.0154774	CITED2/EGR2/PLXNA1/HOXA3/MAFB	5	1.8103
BP	GO:0006575	cellular modified amino acid metabolic process	12/385	180/18903	0.000331524	0.0185161	0.0154774	DUOXA2/DUOX2/MTHFD2/CPT2/CHDH/CRAT/MBOAT1/GGH/SERINC2/SOD2/GGT6/SLC22A4	12	1.8103
BP	GO:1905039	carboxylic acid transmembrane transport	11/385	155/18903	0.000342374	0.0188671	0.0157708	SLC16A1/SLC25A20/ABCD3/CPT2/RGS2/SFXN1/SLC23A3/EMB/SLC1A4/SLC22A4/SLC6A19	11	1.80215
BP	GO:0061687	detoxification of inorganic compound	4/385	18/18903	0.000413383	0.0205726	0.0171964	MT1M/CAT/MT1E/MT2A	4	1.76456
BP	GO:0002260	lymphocyte homeostasis	7/385	69/18903	0.000501653	0.0228982	0.0191404	HIF1A/MIF/TRAF3IP2/PMAIP1/BCL2L11/TSC22D3/TNFRSF17	7	1.71805
BP	GO:0097501	stress response to metal ion	4/385	19/18903	0.000515251	0.0228982	0.0191404	MT1M/MT1E/HSPA5/MT2A	4	1.71805
BP	GO:0050678	regulation of epithelial cell proliferation	19/385	414/18903	0.000896108	0.0319135	0.0266762	HIF1A/FGFR2/XBP1/DUSP10/HOXA5/IFT74/WNT5A/EAF2/MARVELD3/CFLAR/TGFA/ECM1/ZFP36L1/FGF9/ROBO1/ZFP36/HYAL1/SERPINF1/ALDH1A2	19	1.57388
BP	GO:0034975	protein folding in endoplasmic reticulum	3/385	11/18903	0.0012248	0.0353889	0.0295813	P4HB/DNAJC10/HSPA5	3	1.52898
BP	GO:0048565	digestive tract development	9/385	132/18903	0.00154429	0.0401323	0.0335462	HIF1A/FGFR2/HOXA5/WNT5A/FGF9/KLF5/ALDH1A2/CLMP/PYY	9	1.47436
BP	GO:0018126	protein hydroxylation	4/385	27/18903	0.00205172	0.0488073	0.0407976	P4HB/PLOD1/ASPH/FKBP10	4	1.38937
BP	GO:0006534	cysteine metabolic process	3/385	13/18903	0.00205966	0.0488073	0.0407976	MPST/CTH/TST	3	1.38937
CC	GO:0034663	endoplasmic reticulum chaperone complex	5/393	11/19869	1.23633e-06	0.000489585	0.000430762	P4HB/DNAJC10/HYOU1/HSPA5/SDF2L1	5	3.36576
CC	GO:0062023	collagen-containing extracellular matrix	23/393	433/19869	1.93225e-05	0.00259109	0.00227978	FGFR2/ICAM1/ANXA2/MMP28/ADAM19/LAMB2/WNT5A/PCSK6/SERPINB6/ANGPTL4/SERPING1/LGALS1/ANXA6/ECM1/VCAN/S100A4/NID1/SERPINF1/LOXL1/CFP/ZG16/NID2/LAMA4	23	2.64211
CC	GO:0005777	peroxisome	12/393	142/19869	2.61727e-05	0.00259109	0.00227978	USP30/PXMP2/HSDL2/PEX11A/CAT/ECH1/ABCD3/PEX26/ACAA1/CRAT/ACSL4/VIM	12	2.64211
CC	GO:0042581	specific granule	12/393	160/19869	8.42665e-05	0.00667391	0.00587204	CNN2/LYZ/ITGAV/ATP8A1/ACAA1/ITGB2/DEGS1/GGH/ITGAL/MMP25/CFP/C3AR1	12	2.23121
CC	GO:0005793	endoplasmic reticulum-Golgi intermediate compartment	10/393	133/19869	0.000318661	0.01218	0.0107166	CD55/NUCB2/P4HB/MGAT4B/TAPBP/TAP2/HSPA5/TGFA/ROBO1/RGMB	10	1.96994
CC	GO:0005902	microvillus	8/393	93/19869	0.000513767	0.0165779	0.0145861	S100P/ITGAV/VIL1/STARD10/SYTL1/MYO1A/CDHR5/MYO1G	8	1.83606
CC	GO:0098636	protein complex involved in cell adhesion	6/393	52/19869	0.000544225	0.0165779	0.0145861	ITGAV/ITGB2/LAMB2/LGALS1/ITGAL/NID1	6	1.83606
MF	GO:0051787	misfolded protein binding	6/390	29/18432	2.71566e-05	0.0177061	0.0159795	DNAJC10/DNAJB9/HSPA5/SDF2L1/HSPA13/HSPA6	6	1.79644
MF	GO:0001228	DNA-binding transcription activator activity, RNA polymerase II-specific	23/390	468/18432	0.000171805	0.0336716	0.0303881	HIF1A/CREB3L2/HOXA5/SATB2/CEBPB/MAFF/HOXB5/MLXIP/NR5A2/HOXA7/PBX1/NR4A2/KLF7/FOS/EGR2/CREB3L3/KLF5/GRHL3/TFAP2C/ATF3/IKZF3/MAFB/FOSB	23	1.5173
MF	GO:0005543	phospholipid binding	23/390	474/18432	0.000206574	0.0336716	0.0303881	PITPNC1/OSBPL1A/PHLDA1/ZCCHC14/GLTP/APPL2/ANXA2/GRK5/WNT5A/VIL1/DYSF/NR5A2/SNX10/ANXA6/CD300A/ITPR1/SYTL3/EPN3/FCHSD2/DENND1C/MYO1G/PLTP/CCDC88A	23	1.5173

## Sheet: Table S7
Supplementary Table 7 MSigDB pathway results of GR- and TET2-related CD and UC DEGs
a) MSigDB pathway results of UC
Term	Overlap	P.value	Adjusted.P.value	Old.P.value	Old.Adjusted.P.value	Odds.Ratio	Combined.Score	Genes
Hypoxia	31/200	7.53711e-19	3.46707e-17	0	0	9.63266	401.964	PFKFB3;CITED2;NEDD4L;ADM;NDRG1;SELENBP1;MT2A;ZFP36;CASP6;GCNT2;PCK1;PGM1;PDK1;IER3;CA12;ANXA2;HSPA5;DUSP1;MIF;FOS;EFNA1;KLF7;DDIT4;BHLHE40;MAFF;S100A4;KDELR3;ANGPTL4;ATF3;MT1E;TMEM45A
TNF-alpha Signaling via NF-kB	24/200	2.29028e-12	5.26765e-11	0	0	7.02544	188.298	EGR2;BTG2;CEBPB;PFKFB3;DUSP1;SPHK1;ZBTB10;FOS;CFLAR;SOD2;ICAM1;NR4A2;EFNA1;SOCS3;ZFP36;DRAM1;BCL6;MAFF;BHLHE40;FOSB;PHLDA1;ATF3;IER3;BIRC3
Interferon Gamma Response	21/200	6.81161e-10	1.04445e-08	0	0	5.99559	126.55	CD40;CXCL9;UBE2L6;IFI35;SOD2;HIF1A;PSMB10;ICAM1;PSMB9;TAPBP;BST2;SOCS3;MT2A;PNP;SOCS1;LATS2;MTHFD2;PSME2;SERPING1;VAMP5;IRF9
mTORC1 Signaling	19/200	2.32591e-08	2.67479e-07	0	0	5.336	93.7887	XBP1;BTG2;SDF2L1;HSPA5;ELOVL5;ITGB2;SLC1A4;CFP;ADD3;FADS2;PNP;MTHFD2;PPA1;CTH;DDIT4;BHLHE40;FADS1;PGM1;PDK1
Estrogen Response Early	18/200	1.24704e-07	9.56064e-07	0	0	5.014	79.7092	CA12;XBP1;TFAP2C;SLC16A1;OPN3;ELOVL5;PEX11A;FHL2;SLC1A4;FOS;ADD3;IL17RB;AKAP1;MUC1;DEPTOR;BHLHE40;SH3BP5;PMAIP1
Allograft Rejection	18/200	1.24704e-07	9.56064e-07	0	0	5.014	79.7092	MAP4K1;CD40;CXCL9;ITGB2;TAP2;CD3G;CFP;ITGAL;HIF1A;CD3D;PSMB10;ICAM1;TAPBP;CD79A;SOCS1;LCK;DEGS1;HLA-DOB
Apoptosis	15/161	9.0524e-07	5.94872e-06	0	0	5.17771	72.0482	BTG2;RETSAT;TNFRSF12A;CFLAR;SOD2;CDC25B;AIFM3;BCL2L11;ERBB3;CASP6;CTH;PMAIP1;ATF3;IER3;BIRC3
Pperoxisome	12/104	1.17583e-06	6.76104e-06	0	0	6.54085	89.3057	ABCD3;RETSAT;ELOVL5;PEX11A;ECH1;CAT;ACSL4;ACAA1;HSD17B11;SOD2;CRAT;FADS1
Bile Acid Metabolism	12/112	2.60169e-06	1.14243e-05	0	0	6.01512	77.3505	CYP27A1;FADS2;ABCD3;RETSAT;ABCA5;LCK;PEX11A;PXMP2;CAT;HSD17B11;FADS1;PEX26
IL-2/STAT5 Signaling	16/199	2.79218e-06	1.14243e-05	0	0	4.40928	56.3889	XBP1;ECM1;PRKCH;NDRG1;SERPINB6;ADAM19;MUC1;PNP;SOCS1;BHLHE40;MAFF;NFKBIZ;ENPP1;ITGAV;PHLDA1;SMPDL3A
Adipogenesis	16/200	2.98026e-06	1.14243e-05	0	0	4.38509	55.7937	PFKFB3;RETSAT;LAMA4;ECH1;CHCHD10;BCL6;CPT2;TST;CAT;DNAJB9;PIM3;ANGPTL4;ACO2;ACADS;CRAT;PGM1
Inflammatory Response	16/200	2.98026e-06	1.14243e-05	0	0	4.38509	55.7937	CD40;BTG2;CXCL9;CSF3R;SPHK1;KCNA3;ADM;EMP3;HIF1A;ICAM1;TAPBP;BST2;IRAK2;LCK;C3AR1;CD55
Fatty Acid Metabolism	14/158	3.78616e-06	1.33972e-05	0	0	4.88749	61.0162	HSDL2;RETSAT;ELOVL5;ECH1;UBE2L6;ACSL4;MIF;HSD17B11;LGALS1;CPT2;ACO2;ACAA1;ACADS;CRAT
p53 Pathway	15/200	1.32075e-05	4.3396e-05	0	0	4.078	45.8152	PLK3;BTG2;RETSAT;SPHK1;TGFA;FOS;NDRG1;PITPNC1;ZFP36L1;SOCS1;DRAM1;DDIT4;S100A4;ATF3;IER3
Unfolded Protein Response	11/113	1.7106e-05	5.24583e-05	0	0	5.39133	59.1757	XBP1;CEBPB;HSPA5;MTHFD2;BAG3;DDIT4;DNAJB9;SLC1A4;HYOU1;KDELR3;ATF3
Glycolysis	14/200	5.45833e-05	0.000156927	0	0	3.77569	37.0614	HOMER1;HSPA5;CITED2;TGFA;MIF;PLOD1;FUT8;VCAN;CASP6;CTH;DDIT4;KDELR3;ANGPTL4;IER3
UV Response Up	12/158	8.49572e-05	0.000229884	0	0	4.11022	38.5266	BTG2;BCL2L11;TST;GGH;FOSB;FOS;ACAA1;SOD2;CLCN2;HSPA13;ATF3;ICAM1
Estrogen Response Late	13/200	0.000209572	0.000507384	0	0	3.47809	29.4609	CA12;XBP1;TFAP2C;SLC16A1;OPN3;ELOVL5;SNX10;SLC1A4;FOS;ADD3;IL17RB;ZFP36;TST
heme Metabolism	13/200	0.000209572	0.000507384	0	0	3.47809	29.4609	SLC22A4;NFE2;BTG2;GYPC;PDZK1IP1;TRAK2;SELENBP1;SLC25A37;SEC14L1;CAT;TSPAN5;ACP5;ABCG2
Epithelial Mesenchymal Transition	12/200	0.000744393	0.00163058	0	0	3.18509	22.942	ECM1;VCAN;LGALS1;TNFRSF12A;WIPF1;WNT5A;ITGAV;EMP3;PLOD1;VIM;NID2;LOXL1
Xenobiotic Metabolism	12/200	0.000744393	0.00163058	0	0	3.18509	22.942	CYP27A1;MT2A;SLC12A4;RETSAT;ELOVL5;CASP6;ECH1;CAT;GCNT2;ACO2;PGD;PSMB10
IL-6/JAK/STAT3 Signaling	7/87	0.0018237	0.00381318	0	0	4.3348	27.3391	SOCS3;CXCL9;CSF3R;SOCS1;TNFRSF12A;IL17RB;IRF9
KRAS Signaling Up	11/200	0.0024345	0.0048451	0	0	2.89662	17.4319	MAP4K1;MAFB;GYPC;FGF9;BTBD3;ALDH1A2;EPB41L3;ITGB2;C3AR1;ANGPTL4;BIRC3
UV Response Dn	9/144	0.00252788	0.0048451	0	0	3.3102	19.7963	GRK5;ANXA2;CITED2;DUSP1;BHLHE40;FHL2;PTPN21;ADD3;MT1E
Interferon Alpha Response	7/97	0.00338298	0.00622468	0	0	3.85118	21.9094	BST2;PSME2;UBE2L6;NCOA7;IFI35;IRF9;PSMB9
Androgen Response	7/100	0.00400651	0.00708844	0	0	3.72638	20.569	ELOVL5;ZBTB10;PTPN21;DNAJB9;ITGAV;NDRG1;FADS1
Complement	10/200	0.00729192	0.0124233	0	0	2.6126	12.8566	CEBPB;KLK1;HSPA5;LCK;MAFF;SERPING1;ADAM9;CD55;GNAI2;PSMB9
Cholesterol Homeostasis	5/74	0.01646	0.0270414	0	0	3.57378	14.6769	FADS2;TNFRSF12A;ECH1;ATF3;CXCL16
b) MSigDB pathway results of CD
Term	Overlap	P.value	Adjusted.P.value	Old.P.value	Old.Adjusted.P.value	Odds.Ratio	Combined.Score	Genes
Interferon Gamma Response	21/200	1.02927e-16	4.11709e-15	0	0	14.5846	536.896	CD40;CXCL9;UBE2L6;ISG15;IFI35;SOD2;HIF1A;PSMB10;PSMB8;ICAM1;TAPBP;PSMB9;BST2;SOCS3;SOCS1;APOL6;MTHFD2;PSME2;SERPING1;VAMP5;IRF9
TNF-alpha Signaling via NF-kB	17/200	3.11712e-12	4.15616e-11	0	0	11.2611	298.352	EGR2;CEBPB;PFKFB3;SPHK1;FOS;SOD2;ICAM1;EFNA1;SOCS3;DRAM1;BCL6;BHLHE40;MAFF;PHLDA1;ATF3;IER3;BIRC3
Allograft Rejection	17/200	3.11712e-12	4.15616e-11	0	0	11.2611	298.352	IL11;CD40;CXCL9;ITGB2;TAP2;CD3G;CFP;ITGAL;HIF1A;CD3D;PSMB10;ICAM1;TAPBP;CD79A;SOCS1;LCK;HLA-DOB
Hypoxia	16/200	3.49231e-11	3.49231e-10	0	0	10.4759	252.236	PFKFB3;ADM;FOS;EFNA1;SELENBP1;DDIT4;BHLHE40;MAFF;S100A4;KDELR3;ANGPTL4;PCK1;ATF3;IER3;MT1E;TMEM45A
Inflammatory Response	13/200	3.15222e-08	2.52177e-07	0	0	8.22247	142.023	CD40;CXCL9;CSF3R;SPHK1;ADM;EMP3;HIF1A;ICAM1;TAPBP;BST2;LCK;C3AR1;CD55
Interferon Alpha Response	9/97	2.1892e-07	1.45947e-06	0	0	11.8715	182.044	BST2;PSME2;UBE2L6;ISG15;NCOA7;IFI35;IRF9;PSMB8;PSMB9
IL-2/STAT5 Signaling	11/199	1.85514e-06	9.74017e-06	0	0	6.83773	90.2413	ADAM19;XBP1;MUC1;PRKCH;SOCS1;BHLHE40;MAFF;NFKBIZ;ENPP1;PHLDA1;SMPDL3A
p53 Pathway	11/200	1.94803e-06	9.74017e-06	0	0	6.80121	89.427	PLK3;SOCS1;DRAM1;RETSAT;SPHK1;DDIT4;S100A4;FOS;ATF3;PITPNC1;IER3
Unfolded Protein Response	8/113	8.09601e-06	3.59822e-05	0	0	8.78463	102.992	XBP1;CEBPB;MTHFD2;BAG3;DDIT4;DNAJB9;KDELR3;ATF3
Estrogen Response Early	9/200	8.19818e-05	0.000327927	0	0	5.44102	51.1947	XBP1;MUC1;SLC16A1;ELOVL5;BHLHE40;FHL2;SH3BP5;FOS;IL17RB
IL-6/JAK/STAT3 Signaling	6/87	0.000130957	0.000476206	0	0	8.45215	75.5677	SOCS3;CXCL9;CSF3R;SOCS1;IL17RB;IRF9
Pperoxisome	6/104	0.000347213	0.00115738	0	0	6.97995	55.5993	RETSAT;ELOVL5;ACSL4;HSD17B11;SOD2;FADS1
mTORC1 Signaling	8/200	0.000451529	0.00129008	0	0	4.78289	36.842	XBP1;MTHFD2;ELOVL5;DDIT4;BHLHE40;ITGB2;CFP;FADS1
KRAS Signaling Up	8/200	0.000451529	0.00129008	0	0	4.78289	36.842	FGF9;GYPC;ALDH1A2;ITGB2;C3AR1;ANGPTL4;PSMB8;BIRC3
Fatty Acid Metabolism	7/158	0.000560965	0.00149591	0	0	5.30148	39.6861	LGALS1;RETSAT;ELOVL5;UBE2L6;ACSL4;HSD17B11;ACADS
Apoptosis	7/161	0.000627358	0.00156839	0	0	5.19741	38.3257	AIFM3;RETSAT;SOD2;ATF3;IER3;CDC25B;BIRC3
Adipogenesis	7/200	0.00219967	0.00463089	0	0	4.13893	25.328	PFKFB3;RETSAT;BCL6;DNAJB9;PIM3;ANGPTL4;ACADS
Complement	7/200	0.00219967	0.00463089	0	0	4.13893	25.328	CEBPB;LCK;MAFF;ADAM9;SERPING1;CD55;PSMB9
heme Metabolism	7/200	0.00219967	0.00463089	0	0	4.13893	25.328	SLC22A4;SELENBP1;SEC14L1;GYPC;ACP5;PDZK1IP1;ABCG2
Bile Acid Metabolism	5/112	0.00336864	0.00673728	0	0	5.29434	30.142	RETSAT;LCK;PXMP2;HSD17B11;FADS1
Estrogen Response Late	6/200	0.00935627	0.0162718	0	0	3.50879	16.392	XBP1;SLC16A1;ELOVL5;SNX10;FOS;IL17RB
Epithelial Mesenchymal Transition	6/200	0.00935627	0.0162718	0	0	3.50879	16.392	VCAN;LGALS1;WIPF1;WNT5A;EMP3;VIM
Glycolysis	6/200	0.00935627	0.0162718	0	0	3.50879	16.392	FUT8;VCAN;DDIT4;KDELR3;ANGPTL4;IER3

## Sheet: Table S8
Supplementary Table 8 Cell type-specific expression analysis (CSEA) on GR- and TET2-related CD DEGs after filtering
Tissue_cell_type_name	Developmental_stage	Organ_system	Tissue	Specific_cell_type	General_cell_type	Cell_Ontology_ID	General_tissue_name	Uber_anatomy_ontology_ID	input_list_raw_p	input_list_permutated_p	input_list_rank_p	input_list_combined_p	input_list_combined_log10p	FDR	Genes
AdultTransverseColon_Macrophage	Adult	Digestive system	AdultTransverseColon	Macrophage	Macrophage	CL:0000235	Transverse colon	UBERON:0001157	4.56e-20	4.12e-05	0.0369004	2.19e-05	4.6601	0.00323845	ACP5;ACSL4;ADAM9;BST2;C3AR1;CD300A;CEBPB;CFP;CLEC7A;CSF3R;CXCL9;CYP1B1;DOK3;DRAM1;DYSF;ELOVL5;EMP3;ENTPD1;FADS1;FCGR2A;GPCPD1;HIF1A;ICAM1;IER3;ITGB2;LGALS1;LYZ;MMP25;PFKFB3;PHLDA1;RGS2;S100A4;SCPEP1;SERPINF1;SERPING1;SH3BP5;SLAMF8;SNX10;SOD2;TRPV2;TYROBP;VAMP5;VCAN;VIM;WIPF1
AdultTransverseColon_Dendritic cell	Adult	Digestive system	AdultTransverseColon	Dendritic cell	Dendritic cell	CL:0000451	Transverse colon	UBERON:0001157	3.08e-19	4.12e-05	0.0413284	2.43e-05	4.61431	0.00323845	ACP5;ADAM19;ANXA6;BCL6;BIRC3;BST2;C3AR1;CD300A;CEBPB;CFP;CLEC7A;CSF3R;CXCL9;DUSP10;ELOVL5;ENTPD1;FADS1;FCGR2A;HLA-DOB;ICAM1;IER3;ISG15;ITGB2;LGALS1;LYZ;NFKBIZ;PFKFB3;PSMB9;PSME2;RGS2;S100A4;SCPEP1;SERPINF1;SERPING1;SLAMF8;SNX10;SOCS3;SOD2;TRPV2;TYROBP;UBE2L6;VAMP5;VIM;WIPF1
AdultTransverseColon_Epithelial cell	Adult	Digestive system	AdultTransverseColon	Epithelial cell	Epithelial cell	CL:0000066	Transverse colon	UBERON:0001157	2.14e-10	4.12e-05	0.188192	9.89e-05	4.00468	0.00437097	ABCG2;ACADS;ADM;AHCYL2;APOL6;APPL2;CAMK2N1;DUOX2;EFNA1;EIF4EBP2;FHL2;GSDMB;HSD17B11;IER3;MMP28;MT1E;MT1M;MUC1;PBLD;PCK1;PDE8A;PDZK1IP1;PKIB;PLCD3;RETSAT;RHOU;SATB2;SELENBP1;SLC16A1;SMPDL3A;TAPBP;VIL1
AdultTransverseColon_B cell (Plasmocyte)	Adult	Digestive system	AdultTransverseColon	B cell (Plasmocyte)	B cell	CL:0000236	Transverse colon	UBERON:0001157	9.25e-10	4.12e-05	0.210332	0.000109603	3.96018	0.00438211	ADAM19;ANXA6;BIRC3;BST2;CD40;CD79A;CREB3L2;CRELD2;DDIT4;DNAJB9;DOK3;EAF2;EMP3;ENTPD1;FUT8;GYPC;HLA-DOB;ISG15;ITGAL;LGALS1;MTHFD2;NUCB2;RGS2;SCPEP1;SEC14L1;TMEM45A;TNFRSF17;VAMP5;VIM;WIPF1;XBP1
Fetal_HCA_Intestine_Myeloid cells	Fetal	Digestive system	Fetal_HCA_Intestine	Myeloid cells	Myeloid cell	CL:0000763	Intestine	UBERON:0000160	3.14e-14	8.23e-05	0.105535	0.000109957	3.95878	0.00438211	CSF3R;S100A4;SLAMF8;FCGR2A;RGS2;CD55;MTHFD2;WIPF1;ITPR1;SH3BP5;EAF2;BCL6;ADAM19;DOK3;SNX10;PFKFB3;ENTPD1;BIRC3;C3AR1;CLEC7A;LYZ;DRAM1;HIF1A;MMP25;ITGAL;SERPINF1;PITPNC1;CD300A;SEC14L1;ICAM1;BST2;TYROBP;GPCPD1;CD40;ITGB2;CFP;ACSL4
FetalIntestine_Endothelial cell	Fetal	Digestive system	FetalIntestine	Endothelial cell	Endothelial cell	CL:0000115	Intestine	UBERON:0000160	8.98e-09	0.000329367	0.248708	0.000852734	3.06919	0.0102253	ABCG2;ADM;ANXA6;CD40;CYP1B1;DDIT4;DYSF;EFNA1;ELOVL5;ENTPD1;FADS1;FAM167B;GYPC;ICAM1;ISG15;LGALS1;MMP28;PIM3;PLS3;PRKCH;PSMB9;RND1;ROBO1;SEC14L1;SERPING1;SH3BP5;SOCS3;VAMP5;VIM
TS_Small_Intestine_neutrophil	Adult	Digestive system	TS_Small_Intestine	neutrophil	Neutrophil	CL:0000775	Small intestine	UBERON:0002108	3.78e-22	0.00436411	0.0258303	0.00113747	2.94406	0.0119551	CSF3R;SLAMF8;FCGR2A;CYP1B1;DYSF;ITPR1;SH3BP5;WNT5A;BCL6;VCAN;DOK3;IER3;PKIB;SMPDL3A;SOD2;SNX10;ADAM9;PFKFB3;EGR2;ENTPD1;ADM;SERPING1;FADS1;C3AR1;CLEC7A;LYZ;PHLDA1;DRAM1;HIF1A;MMP25;SERPINF1;SCPEP1;CD300A;SPHK1;SOCS3;OSBPL1A;ICAM1;ACP5;BST2;TYROBP;EMP3;GPCPD1;CD40;CEBPB;ITGB2;LGALS1;CFP;ACSL4
FetalIntestine_Dendritic cell	Fetal	Digestive system	FetalIntestine	Dendritic cell	Dendritic cell	CL:0000451	Intestine	UBERON:0000160	6.69e-15	0.00156449	0.0929889	0.00143087	2.8444	0.0133693	ABCG2;ADAM19;BIRC3;BST2;C3AR1;CD300A;CD40;CFP;CLEC7A;CSF3R;EAF2;EMP3;ENTPD1;FADS1;GPCPD1;HLA-DOB;ISG15;ITGAL;ITGB2;LGALS1;LYZ;MMP25;MTHFD2;PKIB;PSMB10;PSMB8;PSMB9;PSME2;RGS2;S100A4;SERPINF1;SLAMF8;SNX10;TAP2;TYROBP;UBE2L6;VIM;WIPF1
AdultSigmoidColon_Mast cell	Adult	Digestive system	AdultSigmoidColon	Mast cell	Mast cell	CL:0000097	Sigmoid colon	UBERON:0001159	8.31e-05	0.00045288	0.452399	0.00194496	2.71109	0.0154568	ACSL4;BIRC3;C3AR1;CD300A;DDIT4;DNAJB9;DUSP10;ELOVL5;EMP3;FGF9;FGFR2;ICAM1;IER3;NFKBIZ;PLK3;PNLIPRP2;RGS2;S100A4;TYROBP;VIM;XBP1
AdultSigmoidColon_Stromal cell	Adult	Digestive system	AdultSigmoidColon	Stromal cell	Stromal cell	CL:0000499	Sigmoid colon	UBERON:0001159	8.72e-06	0.000741076	0.384502	0.00261101	2.58319	0.0182224	ACP5;ADM;ANXA6;BST2;CD40;EMP3;FKBP10;FOS;GYPC;KDELR3;LGALS1;PLS3;S100A4;SCPEP1;SERPINF1;SERPING1;SH3BP5;SMPDL3A;SOD2;TMEM45A;VAMP5;VCAN;VIM
AdultSigmoidColon_Epithelial cell	Adult	Digestive system	AdultSigmoidColon	Epithelial cell	Epithelial cell	CL:0000066	Sigmoid colon	UBERON:0001159	8.31e-05	0.000699905	0.452399	0.00286801	2.54242	0.0191436	ACADS;AHCYL2;APPL2;CAMK2N1;DEPDC7;DUOX2;DUOXA2;EFNA1;FHL2;GSDMB;MT1E;MT1M;PKIB;PLCD3;PSMB10;PSME2;RETSAT;SLC16A1;SLC23A3;SLC6A19;SMPDL3A
FetalIntestine_Macrophage	Fetal	Digestive system	FetalIntestine	Macrophage	Macrophage	CL:0000235	Intestine	UBERON:0000160	3.54e-08	0.00144098	0.273063	0.00347854	2.4586	0.0215225	ABCG2;ADAM19;BAG3;BST2;C3AR1;CD300A;CEBPB;CFP;CLEC7A;CRELD2;CSF3R;EAF2;FCGR2A;FOXP2;ICAM1;IER3;ISG15;ITGAL;ITGB2;ITPR1;LYZ;MTHFD2;NUCB2;PITPNC1;PSMB9;RGS2;SERPINF1;TYROBP
Fetal_HCA_Intestine_Lymphoid cells	Fetal	Digestive system	Fetal_HCA_Intestine	Lymphoid cells	Innate lymphoid cell	CL:0001065	Intestine	UBERON:0000160	9.96e-11	0.0032525	0.18155	0.00498053	2.30272	0.0282369	ISG15;LCK;S100A4;CD55;DUSP10;GYPC;WIPF1;ITPR1;ANXA6;ADAM19;TAP2;PSMB8;PSMB9;TAPBP;ELOVL5;ENPP1;SNX10;PFKFB3;DDIT4;BIRC3;CD3D;CD3G;PRKCH;HIF1A;ITGAL;TRPV2;PITPNC1;CD300A;ICAM1;CD79A;GPCPD1;ITGB2
FetalIntestine_T cell	Fetal	Digestive system	FetalIntestine	T cell	T cell	CL:0000084	Intestine	UBERON:0000160	2.18e-09	0.00267611	0.226568	0.00509801	2.2926	0.0286731	ANXA6;BIRC3;BST2;CD3D;CD3G;CD79A;DDIT4;DUSP10;ELOVL5;EMP3;ENTPD1;GYPC;ISG15;ITGAL;ITGB2;LCK;LYPD5;PFKFB3;PRKCH;PSMB8;PSMB9;PSME2;RGS2;S100A4;S100P;TAP2;TYROBP;UBE2L6;VAMP5;WIPF1
AdultTransverseColon_Mast cell	Adult	Digestive system	AdultTransverseColon	Mast cell	Mast cell	CL:0000097	Transverse colon	UBERON:0001157	7.56e-05	0.00135864	0.446494	0.00510026	2.29241	0.0286731	ACSL4;ANXA6;BHLHE40;BIRC3;BST2;C3AR1;CD300A;DDIT4;DUSP10;ELOVL5;EMP3;HIF1A;ICAM1;LGALS1;NFKBIZ;PLK3;RGS2;S100A4;SOCS1;TYROBP;VIM;WIPF1
AdultSigmoidColon_B cell (Plasmocyte)	Adult	Digestive system	AdultSigmoidColon	B cell (Plasmocyte)	B cell	CL:0000236	Sigmoid colon	UBERON:0001159	8.31e-05	0.00148215	0.452399	0.00557034	2.25412	0.029979	BAG3;BIRC3;BST2;CD79A;CREB3L2;CRELD2;DDIT4;DNAJB9;EAF2;EMP3;HLA-DOB;ICAM1;LGALS1;MTHFD2;NUCB2;PSMB9;RGS2;RND1;TAP2;TNFRSF17;XBP1
TS_Large_Intestine_mature enterocyte	Adult	Digestive system	TS_Large_Intestine	mature enterocyte	Enterocyte	CL:0000584	Large intestine	UBERON:0000059	9.53e-05	0.00144098	0.465683	0.00557412	2.25382	0.029979	SELENBP1;EFNA1;MUC1;RHOU;RETSAT;VIL1;ABCG2;SLC6A19;SLC22A4;PKIB;SMPDL3A;FRMD1;AHCYL2;PBLD;APPL2;ACADS;MT1E;MT1M;MMP28;GSDMB;PLCD3;PCK1
AdultTransverseColon_Enterocyte	Adult	Digestive system	AdultTransverseColon	Enterocyte	Enterocyte	CL:0000584	Transverse colon	UBERON:0001157	8.37e-06	0.00218206	0.383026	0.0067591	2.17011	0.0331833	ADM;ATF3;BAG3;BHLHE40;CAMK2N1;CHDH;EFNA1;FGFR2;FHL2;FOS;GPCPD1;HIF1A;IER3;IL17RB;KDELR3;MAFF;MUC1;NCOA7;PCK1;S100P;SLC22A23;TAPBP;VIL1;XBP1
AdultAscendingColon_Stromal cell	Adult	Digestive system	AdultAscendingColon	Stromal cell	Stromal cell	CL:0000499	Ascending colon	UBERON:0001156	4.82e-05	0.00201737	0.435424	0.00706016	2.15119	0.0338039	ADM;ANGPTL4;BCL6;BHLHE40;CEBPB;EGR2;FHL2;FKBP10;FOS;IER3;LGALS1;MAFF;PDK2;PHLDA1;S100A4;SERPINF1;SERPING1;SMPDL3A;SOD2;VCAN;VIM
TS_Large_Intestine_plasma cell	Adult	Digestive system	TS_Large_Intestine	plasma cell	Plasma cell	CL:0000786	Large intestine	UBERON:0000059	4.93e-18	0.019515	0.0531365	0.00816239	2.08818	0.0365018	S100A4;FCGR2A;CD55;MTHFD2;VAMP5;GYPC;SH3BP5;TMEM45A;EAF2;ANXA6;ADAM19;DOK3;HLA-DOB;PSMB9;TAPBP;DNAJB9;CREB3L2;VIM;DDIT4;ENTPD1;NUCB2;BIRC3;DRAM1;PSME2;FUT8;TNFRSF17;ITGAL;SCPEP1;CD300A;SEC14L1;ICAM1;ACP5;BST2;CD79A;EMP3;CD40;SLCO4A1;XBP1;LGALS1;KDELR3;CRELD2;PIM3;ACSL4
AdultSigmoidColon_Enterocyte progenitor	Adult	Digestive system	AdultSigmoidColon	Enterocyte progenitor	Enterocyte	CL:0000584	Sigmoid colon	UBERON:0001159	0.000237634	0.00251142	0.490775	0.00948896	2.02278	0.0407259	ACADS;AIFM3;CAMK2N1;CLDN15;EFNA1;FRMD1;MMP28;MT1E;MUC1;NCOA7;PBLD;PCK1;PXMP2;PYY;S100P;SATB2;SELENBP1;SLC22A23;VIL1;ZNF57
TS_Small_Intestine_plasma cell	Adult	Digestive system	TS_Small_Intestine	plasma cell	Plasma cell	CL:0000786	Small intestine	UBERON:0002108	3.02e-17	0.0237968	0.0583026	0.010517	1.97811	0.0440117	S100A4;MTHFD2;VAMP5;GYPC;SH3BP5;TMEM45A;EAF2;ANXA6;ADAM19;DOK3;HLA-DOB;TAPBP;DNAJB9;CREB3L2;TMEM38B;VIM;DDIT4;ENTPD1;NUCB2;BIRC3;DRAM1;PSME2;IRF9;FUT8;TNFRSF17;PSMB10;IFI35;SCPEP1;CD300A;SPHK1;SEC14L1;ICAM1;ACP5;BST2;CD79A;EMP3;CD40;XBP1;LGALS1;KDELR3;CRELD2;PIM3
TS_Small_Intestine_fibroblast	Adult	Digestive system	TS_Small_Intestine	fibroblast	Fibroblast	CL:0000057	Small intestine	UBERON:0002108	1.83e-20	0.0560747	0.0332103	0.0135684	1.86747	0.0516425	SELENBP1;RGS5;CYP1B1;VAMP5;SH3BP5;WNT5A;GXYLT2;ROBO1;TMEM45A;BCL6;VCAN;ANXA6;IER3;SOD2;FOXP2;CREB3L2;ADAM9;VIM;GRK5;BAG3;ADM;SERPING1;FADS1;PHLDA1;DRAM1;DUOX2;DUOXA2;PDE8A;MT1M;SERPINF1;FKBP10;SCPEP1;SPHK1;SOCS3;OSBPL1A;ANGPTL4;ICAM1;BST2;EMP3;CD40;CEBPB;LGALS1;MAFF;KDELR3;ACSL4;PLS3
AdultSigmoidColon_Dendritic cell	Adult	Digestive system	AdultSigmoidColon	Dendritic cell	Dendritic cell	CL:0000451	Sigmoid colon	UBERON:0001159	7.51e-07	0.00584627	0.326199	0.0138494	1.85857	0.0520659	ATF3;BIRC3;C3AR1;CD300A;CD55;CEBPB;CFP;CLEC7A;CSF3R;DDIT4;ENTPD1;FCGR2A;HIF1A;ICAM1;IER3;ITGB2;LYZ;MAFF;NFKBIZ;PFKFB3;RGS2;SLAMF8;SOD2;TYROBP;USP30
Fetal_HCA_Intestine_Vascular endothelial cells	Fetal	Digestive system	Fetal_HCA_Intestine	Vascular endothelial cells	Endothelial cell	CL:0000115	Intestine	UBERON:0000160	4.92e-05	0.00498168	0.437269	0.0155298	1.80883	0.0556904	FAM167B;EFNA1;DYSF;VAMP5;SH3BP5;ABCG2;ADAM19;VIM;DDIT4;ENTPD1;GRK5;RND1;PRKCH;HIF1A;MMP28;PITPNC1;SEC14L1;SOCS3;ICAM1;CD40;PIM3;PLS3
AdultTransverseColon_T cell	Adult	Digestive system	AdultTransverseColon	T cell	T cell	CL:0000084	Transverse colon	UBERON:0001157	7.56e-05	0.00564041	0.446494	0.0175889	1.75476	0.0607984	BIRC3;CD3D;CD3G;DUSP10;ELOVL5;ENTPD1;GYPC;ISG15;ITPR1;LCK;LGALS1;PFKFB3;PHLDA1;PITPNC1;PRKCH;PSMB9;RGS2;S100A4;TRPV2;VAMP5;VIM;WIPF1
TS_Large_Intestine_gut endothelial cell	Adult	Digestive system	TS_Large_Intestine	gut endothelial cell	Endothelial cell	CL:0000115	Large intestine	UBERON:0000059	7.86e-19	0.0607682	0.0439114	0.0184822	1.73325	0.0629231	FAM167B;EFNA1;RGS5;RHOU;CYP1B1;DYSF;VAMP5;BHLHE40;SH3BP5;ROBO1;HSD17B11;ABCG2;PSMB8;PSMB9;NCOA7;VIM;ENTPD1;GRK5;BAG3;NUCB2;UBE2L6;SERPING1;CLEC7A;RND1;PHLDA1;DRAM1;PRKCH;HIF1A;ALDH1A2;MMP28;PITPNC1;SPHK1;SEC14L1;SOCS3;OSBPL1A;ICAM1;BST2;LYPD5;CDC25B;CD40;SLCO4A1;MAFF;ACSL4;PLS3
TS_Large_Intestine_fibroblast	Adult	Digestive system	TS_Large_Intestine	fibroblast	Fibroblast	CL:0000057	Large intestine	UBERON:0000059	2.66e-21	0.106139	0.0295203	0.0211985	1.67369	0.0690481	S100A4;RGS5;RGS2;ATF3;CYP1B1;MTHFD2;VAMP5;GYPC;SH3BP5;WNT5A;ROBO1;TMEM45A;NFKBIZ;BCL6;VCAN;ANXA6;SMPDL3A;NCOA7;SOD2;CREB3L2;VIM;EGR2;GRK5;BAG3;ADM;SERPING1;PHLDA1;DRAM1;FOS;DUOX2;SERPINF1;FKBP10;SCPEP1;SPHK1;SOCS3;OSBPL1A;ANGPTL4;ICAM1;BST2;EMP3;CD40;CEBPB;XBP1;LGALS1;MAFF;ACSL4;PLS3
FetalIntestine_Fetal stromal cell	Fetal	Digestive system	FetalIntestine	Fetal stromal cell	Stromal cell	CL:0000499	Intestine	UBERON:0000160	0.000416102	0.00646383	0.50738	0.0220391	1.65681	0.0709335	ANGPTL4;ANXA6;ART3;BST2;EMP3;FKBP10;FOS;GYPC;IER3;LGALS1;PHLDA1;PLS3;RGS2;RND1;SERPINF1;SERPING1;SOCS3;TMEM45A;VCAN;VIM
AdultTransverseColon_Stromal cell	Adult	Digestive system	AdultTransverseColon	Stromal cell	Stromal cell	CL:0000499	Transverse colon	UBERON:0001157	7.56e-05	0.0074931	0.446494	0.022416	1.64944	0.0719757	ANXA6;BST2;EMP3;FKBP10;GRK5;LGALS1;PHLDA1;PLS3;ROBO1;S100A4;SCPEP1;SERPINF1;SERPING1;SH3BP5;SMPDL3A;SOCS3;SOD2;TMEM45A;UBE2L6;VAMP5;VCAN;VIM
TS_Large_Intestine_monocyte	Adult	Digestive system	TS_Large_Intestine	monocyte	Monocyte	CL:0000576	Large intestine	UBERON:0000059	7.86e-19	0.0900819	0.0439114	0.0258406	1.5877	0.0785067	S100A4;ATF3;VAMP5;ITPR1;BHLHE40;SH3BP5;GXYLT2;NFKBIZ;BCL6;ART3;PTPN13;ARHGEF37;ANXA6;IER3;ELOVL5;SOD2;CREB3L2;PFKFB3;VIM;EGR2;DDIT4;BAG3;DEPDC7;SERPING1;FADS1;BIRC3;RND1;PHLDA1;IRF9;FOS;MT1E;MT1M;IFI35;SCPEP1;SPHK1;SOCS3;OSBPL1A;ANGPTL4;ICAM1;CDC25B;CEBPB;LGALS1;MAFF;PLS3
TS_Large_Intestine_enterocyte of epithelium of large intestine	Adult	Digestive system	TS_Large_Intestine	enterocyte of epithelium of large intestine	Enterocyte	CL:0000584	Large intestine	UBERON:0000059	5.63e-15	0.0498579	0.0885609	0.0283589	1.54731	0.084084	CAMK2N1;PDZK1IP1;SELENBP1;EFNA1;MUC1;ATF3;RHOU;FHL2;SATB2;VIL1;SLC23A3;CHDH;S100P;FOXQ1;SLC22A23;IER3;PKIB;ENPP1;FRMD1;CLDN15;FOXP2;AHCYL2;ADAM9;PBLD;PNLIPRP2;ADM;RND1;ACADS;PXMP2;PDE8A;MT1E;MMP28;PLCD3;ZNF57;ANGPTL4;PCK1;AIFM3;MAFF;PIM3
AdultAscendingColon_Enterocyte progenitor	Adult	Digestive system	AdultAscendingColon	Enterocyte progenitor	Enterocyte	CL:0000584	Ascending colon	UBERON:0001156	0.00108136	0.00852237	0.542066	0.0294618	1.53074	0.0860359	ACADS;CHDH;EFNA1;FHL2;FOS;HSD17B11;MT1E;PBLD;PCK1;PDE8A;PDZK1IP1;PKIB;PLCD3;S100P;SATB2;SELENBP1;VIL1;ZNF57
Fetal_HCA_Intestine_Stromal cells	Fetal	Digestive system	Fetal_HCA_Intestine	Stromal cells	Stromal cell	CL:0000499	Intestine	UBERON:0000160	4.92e-05	0.0122278	0.437269	0.0333174	1.47733	0.0938567	DUSP10;ITPR1;WNT5A;ROBO1;TMEM45A;ABCG2;VCAN;ANXA6;FOXP2;VIM;GRK5;FGFR2;SERPING1;PHLDA1;DRAM1;FOS;ALDH1A2;FKBP10;SOCS3;BST2;EMP3;LGALS1
AdultAscendingColon_T cell	Adult	Digestive system	AdultAscendingColon	T cell	T cell	CL:0000084	Ascending colon	UBERON:0001156	0.00108136	0.0111161	0.542066	0.0368273	1.43383	0.100203	BIRC3;CD3D;CD3G;CREB3L3;ELOVL5;ENTPD1;ISG15;LCK;MUC1;PFKFB3;PHLDA1;PIM3;PITPNC1;PRKCH;PSMB8;S100A4;VIM;WIPF1
FetalIntestine_Fetal mesenchymal progenitor	Fetal	Digestive system	FetalIntestine	Fetal mesenchymal progenitor	Mesenchymal stem cell	CL:0000134	Intestine	UBERON:0000160	0.000416102	0.0123101	0.50738	0.037949	1.4208	0.102351	ALDH1A2;ANXA6;BST2;CDC25B;EMP3;FKBP10;FOS;GPCPD1;GYPC;LGALS1;NUCB2;PHLDA1;PLS3;SERPINF1;SERPING1;SH3BP5;TMEM45A;VCAN;VIM;WNT5A
TS_Small_Intestine_enterocyte of epithelium of small intestine	Adult	Digestive system	TS_Small_Intestine	enterocyte of epithelium of small intestine	Enterocyte	CL:0000584	Small intestine	UBERON:0002108	1.78e-16	0.110009	0.0701107	0.0452345	1.34453	0.116085	CAMK2N1;SELENBP1;EFNA1;ATF3;RHOU;RETSAT;FHL2;SATB2;STRADB;VIL1;CHDH;HSD17B11;ABCG2;SLC6A19;ARHGEF37;SLC22A23;IER3;PKIB;SMPDL3A;ENPP1;CLDN15;FOXP2;AHCYL2;ADAM9;PBLD;PNLIPRP2;ADM;DEPDC7;RND1;ACADS;PXMP2;FUT8;PDE8A;MT1E;GSDMB;OSBPL1A;ZNF57;CREB3L3;ANGPTL4;PCK1;XBP1
TS_Small_Intestine_monocyte	Adult	Digestive system	TS_Small_Intestine	monocyte	Monocyte	CL:0000576	Small intestine	UBERON:0002108	5.66e-15	0.0963399	0.0896679	0.049685	1.30377	0.124442	ATF3;VAMP5;ITPR1;BHLHE40;SH3BP5;GXYLT2;BCL6;ART3;PTPN13;VCAN;IER3;SOD2;CREB3L2;PFKFB3;VIM;EGR2;BAG3;DEPDC7;SERPING1;FADS1;PHLDA1;IRF9;FOS;DUOX2;MT1E;MT1M;MMP28;FKBP10;IFI35;PLCD3;SCPEP1;SPHK1;SOCS3;OSBPL1A;ANGPTL4;CEBPB;LGALS1;MAFF;PLS3
TS_Small_Intestine_immature enterocyte	Adult	Digestive system	TS_Small_Intestine	immature enterocyte	Enterocyte	CL:0000584	Small intestine	UBERON:0002108	4.96e-18	0.175264	0.0538745	0.0534675	1.27191	0.132317	CAMK2N1;PDZK1IP1;SELENBP1;EFNA1;MUC1;ATF3;RHOU;RETSAT;FHL2;STRADB;VIL1;SLC25A20;HSD17B11;SLC6A19;FOXQ1;SLC22A23;PSMB8;PSMB9;SMPDL3A;NCOA7;CLDN15;AHCYL2;ADAM9;EGR2;PBLD;PNLIPRP2;LYZ;ACADS;PXMP2;PSME2;PDE8A;MT1E;MT1M;PSMB10;MMP28;GSDMB;IFI35;PDK2;OSBPL1A;ZNF57;CREB3L3;PCK1;PLS3
TS_Large_Intestine_cd8-positive, alpha-beta t cell	Adult	Digestive system	TS_Large_Intestine	cd8-positive, alpha-beta t cell	T cell	CL:0000084	Large intestine	UBERON:0000059	1.02e-15	0.14488	0.0767528	0.0611488	1.21361	0.145108	ISG15;LCK;S100A4;RGS2;CD55;DUSP10;DYSF;MTHFD2;VAMP5;GYPC;WIPF1;ANXA6;TAP2;PSMB9;ELOVL5;PFKFB3;VIM;DDIT4;ENTPD1;GRK5;UBE2L6;BIRC3;CD3D;CD3G;PRKCH;FOS;SOCS1;ITGAL;TRPV2;PITPNC1;CD300A;SEC14L1;BST2;TYROBP;EMP3;GPCPD1;SLCO4A1;ITGB2;APOL6;LGALS1
TS_Large_Intestine_mast cell	Adult	Digestive system	TS_Large_Intestine	mast cell	Mast cell	CL:0000097	Large intestine	UBERON:0000059	1.57e-13	0.0983984	0.114391	0.0617596	1.2093	0.146301	ISG15;PLK3;S100A4;RGS2;DUSP10;MTHFD2;ITPR1;BHLHE40;NFKBIZ;SLC22A4;ANXA6;DOK3;TAPBP;ELOVL5;SNX10;DNAJB9;CREB3L2;VIM;DDIT4;FADS1;BIRC3;C3AR1;DRAM1;HIF1A;SOCS1;TRPV2;CD300A;ICAM1;ACP5;BST2;TYROBP;EMP3;CEBPB;SLCO4A1;ITGB2;LGALS1;ACSL4
TS_Small_Intestine_mast cell	Adult	Digestive system	TS_Small_Intestine	mast cell	Mast cell	CL:0000097	Small intestine	UBERON:0002108	8.1e-11	0.0712256	0.175277	0.0672061	1.17259	0.154085	S100A4;RGS5;RGS2;DUSP10;ITPR1;BHLHE40;NFKBIZ;ANXA6;DOK3;ELOVL5;PKIB;CREB3L2;TMEM38B;VIM;DDIT4;FADS1;BIRC3;C3AR1;DRAM1;HIF1A;DUOX2;PDE8A;SOCS1;TRPV2;CD300A;ICAM1;BST2;TYROBP;EMP3;CD40;ITGB2;LGALS1;ACSL4
TS_Small_Intestine_cd8-positive, alpha-beta t cell	Adult	Digestive system	TS_Small_Intestine	cd8-positive, alpha-beta t cell	T cell	CL:0000084	Small intestine	UBERON:0002108	5.66e-15	0.147392	0.0896679	0.0703941	1.15246	0.159505	ISG15;LCK;S100A4;CD55;DUSP10;DYSF;MTHFD2;VAMP5;GYPC;WIPF1;ITPR1;NFKBIZ;ANXA6;PSMB9;TAPBP;ELOVL5;PFKFB3;VIM;NUCB2;BIRC3;CD3D;CD3G;PHLDA1;FGF9;PRKCH;HIF1A;FOS;SOCS1;ITGAL;TRPV2;PITPNC1;SEC14L1;BST2;EMP3;GPCPD1;CEBPB;ITGB2;APOL6;LGALS1
FetalIntestine_Smooth muscle cell	Fetal	Digestive system	FetalIntestine	Smooth muscle cell	Smooth muscle cell	CL:0000192	Intestine	UBERON:0000160	0.00262588	0.0233027	0.583026	0.0719887	1.14274	0.162575	ANXA6;BST2;CYP1B1;EMP3;ENTPD1;FHL2;FKBP10;FOXP2;LCK;LGALS1;MTHFD2;NUCB2;PLS3;RGS5;SOCS1;TMEM45A;VIM;WDR44
TS_Large_Intestine_cd4-positive, alpha-beta t cell	Adult	Digestive system	TS_Large_Intestine	cd4-positive, alpha-beta t cell	T cell	CL:0000084	Large intestine	UBERON:0000059	1.57e-13	0.143192	0.114391	0.0837293	1.07712	0.180946	ISG15;LCK;S100A4;RGS2;CD55;DUSP10;MTHFD2;VAMP5;GYPC;WIPF1;ITPR1;BHLHE40;PTPN13;ADAM19;PSMB9;ELOVL5;DNAJB9;PFKFB3;VIM;DDIT4;UBE2L6;BIRC3;CD3D;CD3G;C3AR1;PHLDA1;PRKCH;SOCS1;ITGAL;TRPV2;PITPNC1;SEC14L1;BST2;EMP3;GPCPD1;CEBPB;ITGB2
AdultAscendingColon_B cell (Plasmocyte)	Adult	Digestive system	AdultAscendingColon	B cell (Plasmocyte)	B cell	CL:0000236	Ascending colon	UBERON:0001156	0.0143311	0.0254024	0.665683	0.0859001	1.06601	0.183717	BAG3;BST2;CD79A;CREB3L2;CRELD2;DDIT4;DNAJB9;EAF2;FUT8;KDELR3;LGALS1;NUCB2;TMEM45A;TNFRSF17;XBP1
TS_Small_Intestine_cd4-positive, alpha-beta t cell	Adult	Digestive system	TS_Small_Intestine	cd4-positive, alpha-beta t cell	T cell	CL:0000084	Small intestine	UBERON:0002108	1.57e-13	0.152126	0.115867	0.0888083	1.05155	0.188318	ISG15;LCK;S100A4;RGS2;CD55;DUSP10;MTHFD2;VAMP5;GYPC;WIPF1;ITPR1;NFKBIZ;PTPN13;ANXA6;ADAM19;ELOVL5;DNAJB9;PFKFB3;VIM;DDIT4;UBE2L6;BIRC3;CD3D;CD3G;C3AR1;PHLDA1;PRKCH;HIF1A;SOCS1;ITGAL;TRPV2;PITPNC1;SEC14L1;BST2;EMP3;GPCPD1;CEBPB
TS_Large_Intestine_large intestine goblet cell	Adult	Digestive system	TS_Large_Intestine	large intestine goblet cell	Goblet cell	CL:0000160	Large intestine	UBERON:0000059	1.48e-09	0.0844415	0.220664	0.0928458	1.03224	0.195048	CAMK2N1;EFNA1;MUC1;ATF3;FHL2;SATB2;VIL1;CHDH;IL17RB;S100P;SLC22A23;IER3;ENPP1;FRMD1;FOXP2;ADAM9;FGFR2;ADM;NUCB2;RND1;LYZ;APPL2;C2CD4A;GSDMB;PDK2;OSBPL1A;ANGPTL4;PCK1;AIFM3;XBP1;KDELR3
AdultSigmoidColon_T cell	Adult	Digestive system	AdultSigmoidColon	T cell	T cell	CL:0000084	Sigmoid colon	UBERON:0001159	0.00398426	0.0307135	0.609594	0.0932022	1.03057	0.195192	ANXA6;BIRC3;CD3D;CD3G;ELOVL5;GYPC;ISG15;ITGAL;LCK;PFKFB3;PHLDA1;PIM3;PITPNC1;PRKCH;PSMB9;RGS2;WIPF1
TS_Small_Intestine_small intestine goblet cell	Adult	Digestive system	TS_Small_Intestine	small intestine goblet cell	Goblet cell	CL:0000160	Small intestine	UBERON:0002108	1.79e-11	0.118654	0.158672	0.093617	1.02865	0.195758	CAMK2N1;SELENBP1;EFNA1;ATF3;FHL2;SATB2;VIL1;CHDH;IL17RB;S100P;ABCG2;SLC22A23;IER3;PKIB;ENPP1;CLDN15;FOXP2;AHCYL2;FGFR2;ADM;NUCB2;RND1;APPL2;FUT8;C2CD4A;MMP28;GSDMB;OSBPL1A;ANGPTL4;LYPD5;AIFM3;XBP1;KDELR3;PLS3
AdultTransverseColon_Endothelial cell (APC)	Adult	Digestive system	AdultTransverseColon	Endothelial cell (APC)	Endothelial cell	CL:0000115	Transverse colon	UBERON:0001157	0.000560384	0.0383713	0.518081	0.0977684	1.0098	0.201332	BHLHE40;BST2;CYP1B1;DYSF;FAM167B;ICAM1;ISG15;ITPR1;PITPNC1;PLS3;PRKCH;RND1;ROBO1;SEC14L1;SERPING1;SH3BP5;SOCS3;SPHK1;VAMP5;VIM
TS_Large_Intestine_immature enterocyte	Adult	Digestive system	TS_Large_Intestine	immature enterocyte	Enterocyte	CL:0000584	Large intestine	UBERON:0000059	1.57e-13	0.236897	0.114391	0.124879	0.903511	0.241015	CAMK2N1;PDZK1IP1;SELENBP1;EFNA1;MUC1;RETSAT;FHL2;SATB2;VIL1;CHDH;GXYLT2;HSD17B11;SLC22A23;PSMB8;PKIB;SMPDL3A;NCOA7;SOD2;CLDN15;AHCYL2;ADAM9;TMEM38B;PBLD;EIF4EBP2;PNLIPRP2;ACADS;PXMP2;PSME2;PDE8A;MT1E;MT1M;TMEM170A;MMP28;PLCD3;PDK2;PCK1;AIFM3
Fetal_HCA_Intestine_Smooth muscle cells	Fetal	Digestive system	Fetal_HCA_Intestine	Smooth muscle cells	Smooth muscle cell	CL:0000192	Intestine	UBERON:0000160	0.00575737	0.0553748	0.625092	0.151039	0.82091	0.277315	RGS5;FHL2;ITPR1;ROBO1;TMEM45A;ANXA6;ADAM19;FOXP2;VIM;ENTPD1;BAG3;FGFR2;MMP28;SOCS3;BST2;EMP3;LGALS1
AdultTransverseColon_Smooth muscle cell	Adult	Digestive system	AdultTransverseColon	Smooth muscle cell	Smooth muscle cell	CL:0000192	Transverse colon	UBERON:0001157	0.00757952	0.0702787	0.635424	0.183484	0.736403	0.322013	ANXA6;DYSF;ENTPD1;FADS1;FKBP10;ITPR1;LGALS1;MT1E;MT1M;PHLDA1;PLS3;RGS5;S100A4;SCPEP1;SERPING1;TMEM38B;VIM
TS_Small_Intestine_gut endothelial cell	Adult	Digestive system	TS_Small_Intestine	gut endothelial cell	Endothelial cell	CL:0000115	Small intestine	UBERON:0002108	2.32e-08	0.227428	0.263469	0.22858	0.640962	0.376219	FAM167B;EFNA1;RGS5;CYP1B1;DYSF;VAMP5;SH3BP5;ROBO1;HSD17B11;ABCG2;NCOA7;SOD2;VIM;ENTPD1;GRK5;BAG3;SERPING1;CLEC7A;RND1;ALDH1A2;MMP28;SPHK1;SOCS3;OSBPL1A;ICAM1;BST2;CDC25B;SLCO4A1;PLS3
TS_Large_Intestine_b cell	Adult	Digestive system	TS_Large_Intestine	b cell	B cell	CL:0000236	Large intestine	UBERON:0000059	2.32e-08	0.230722	0.261993	0.230062	0.638156	0.377401	S100A4;FCGR2A;CD55;WIPF1;ITPR1;SH3BP5;ANXA6;DOK3;HLA-DOB;PSMB8;PSMB9;TAPBP;SNX10;VIM;ENTPD1;GRK5;BIRC3;IRF9;HIF1A;TRPV2;SCPEP1;ACP5;BST2;CD79A;EMP3;CD40;ITGB2;LGALS1;PIM3
TS_Small_Intestine_b cell	Adult	Digestive system	TS_Small_Intestine	b cell	B cell	CL:0000236	Small intestine	UBERON:0002108	2.32e-08	0.262711	0.263469	0.25406	0.595065	0.406916	FCGR2A;RGS2;CD55;WIPF1;ITPR1;SH3BP5;ANXA6;DOK3;HLA-DOB;TAPBP;SOD2;SNX10;TMEM38B;VIM;ENTPD1;BIRC3;DRAM1;IRF9;HIF1A;TMEM170A;SCPEP1;ACP5;BST2;CD79A;EMP3;CD40;SLCO4A1;LGALS1;PIM3
AdultTransverseColon_B cell	Adult	Digestive system	AdultTransverseColon	B cell	B cell	CL:0000236	Transverse colon	UBERON:0001157	0.016112	0.106097	0.676015	0.26071	0.583842	0.413172	ACP5;ACSL4;BIRC3;BST2;C3AR1;CD40;CD79A;DYSF;ELOVL5;FUT8;GYPC;HLA-DOB;S100A4;SLAMF8;SNX10;WNT5A
FetalIntestine_Erythroid cell	Fetal	Digestive system	FetalIntestine	Erythroid cell	Erythroid lineage cell	CL:0000764	Intestine	UBERON:0000160	0.027045	0.104451	0.703321	0.265271	0.57631	0.417471	ACSL4;CD55;CFP;DYSF;GYPC;HIF1A;PDZK1IP1;PFKFB3;PHLDA1;PLS3;ROBO1;S100A4;SEC14L1;SERPING1;SH3BP5
FetalIntestine_CB CD34+	Fetal	Digestive system	FetalIntestine	CB CD34+	Hematopoietic stem cell	CL:0000037	Intestine	UBERON:0000160	0.0132013	0.112891	0.660517	0.268145	0.571631	0.419548	ACSL4;BIRC3;BST2;CD300A;CD79A;EAF2;ELOVL5;EMP3;ISG15;LYZ;MTHFD2;NUCB2;PSMB8;PYY;S100A4;TYROBP
TS_Small_Intestine_goblet cell	Adult	Digestive system	TS_Small_Intestine	goblet cell	Goblet cell	CL:0000160	Small intestine	UBERON:0002108	3.52e-06	0.267734	0.360148	0.321959	0.492199	0.483653	CAMK2N1;ATF3;FHL2;STRADB;VIL1;CHDH;SLC22A23;IER3;NCOA7;CLDN15;ADAM9;EGR2;FGFR2;ADM;RND1;LYZ;C2CD4A;MT1E;GSDMB;PDK2;ANGPTL4;AIFM3;XBP1;KDELR3;CRELD2
AdultSigmoidColon_Smooth muscle cell	Adult	Digestive system	AdultSigmoidColon	Smooth muscle cell	Smooth muscle cell	CL:0000192	Sigmoid colon	UBERON:0001159	0.0732026	0.167977	0.758672	0.389979	0.408958	0.559719	ANGPTL4;DYSF;ENTPD1;GRK5;LGALS1;MT1E;MT1M;MTHFD2;PLS3;RGS5;S100A4;TMEM38B;VIM
Fetal_HCA_Intestine_Lymphatic endothelial cells	Fetal	Digestive system	Fetal_HCA_Intestine	Lymphatic endothelial cells	Endothelial cell	CL:0000115	Intestine	UBERON:0000160	0.0501831	0.203796	0.737638	0.435189	0.361322	0.604182	DYSF;VAMP5;GYPC;WIPF1;SH3BP5;ADAM19;SLC22A23;VIM;SERPING1;PRKCH;MMP25;PITPNC1;SPHK1;PLS3
TS_Small_Intestine_mature enterocyte	Adult	Digestive system	TS_Small_Intestine	mature enterocyte	Enterocyte	CL:0000584	Small intestine	UBERON:0002108	0.186815	0.209725	0.811439	0.471549	0.326473	0.647365	SELENBP1;EFNA1;VIL1;SLC6A19;CLDN15;PBLD;PNLIPRP2;MT1E;MT1M;GSDMB;CREB3L3;PCK1
FetalIntestine_Enterocyte progenitor	Fetal	Digestive system	FetalIntestine	Enterocyte progenitor	Enterocyte	CL:0000584	Intestine	UBERON:0000160	0.0937784	0.24122	0.769742	0.49831	0.3025	0.671856	CD55;CHDH;CLEC7A;FOXP2;GSDMB;LYZ;MUC1;PCK1;PDE8A;PLK3;S100P;TAP2;WNT5A
AdultTransverseColon_Enterocyte progenitor	Adult	Digestive system	AdultTransverseColon	Enterocyte progenitor	Enterocyte	CL:0000584	Transverse colon	UBERON:0001157	0.106905	0.295566	0.778598	0.568212	0.24549	0.739603	ACADS;CLDN15;EFNA1;HSD17B11;MT1E;MUC1;NCOA7;PCK1;PSME2;PXMP2;SATB2;SELENBP1;VIL1
AdultSigmoidColon_B cell	Adult	Digestive system	AdultSigmoidColon	B cell	B cell	CL:0000236	Sigmoid colon	UBERON:0001159	0.128379	0.304253	0.789668	0.582877	0.234423	0.756512	ACP5;ADAM19;BIRC3;CD40;CD55;CD79A;ELOVL5;EMP3;FUT8;HLA-DOB;PLK3;SNX10
AdultSigmoidColon_Enterocyte	Adult	Digestive system	AdultSigmoidColon	Enterocyte	Enterocyte	CL:0000584	Sigmoid colon	UBERON:0001159	0.209825	0.371444	0.821402	0.667295	0.175682	0.837983	BAG3;DDIT4;FAM167B;FGFR2;FHL2;FOS;PCK1;PYY;SLC22A23;VIL1;XBP1
FetalIntestine_Fetal enterocyte	Fetal	Digestive system	FetalIntestine	Fetal enterocyte	Enterocyte	CL:0000584	Intestine	UBERON:0000160	0.24887	0.422784	0.831734	0.71916	0.143175	0.884266	CHDH;DDIT4;EMP3;FKBP10;IL17RB;LGALS1;MT1E;RGS2;SOCS3;VCAN;VIM
Fetal_HCA_Intestine_Intestinal epithelial cells	Fetal	Digestive system	Fetal_HCA_Intestine	Intestinal epithelial cells	Epithelial cell	CL:0000066	Intestine	UBERON:0000160	0.359244	0.587262	0.862731	0.851138	0.07	0.980361	CAMK2N1;VIL1;HSD17B11;SLC6A19;SLC22A23;NCOA7;PBLD;PDE8A;MT1E;CREB3L3
TS_Large_Intestine_intestinal enteroendocrine cell	Adult	Digestive system	TS_Large_Intestine	intestinal enteroendocrine cell	Endocrine cell	CL:0000163	Large intestine	UBERON:0000059	0.186684	0.688995	0.809594	0.883422	0.0538318	0.980361	CAMK2N1;SELENBP1;SATB2;STRADB;VIL1;CHDH;IL17RB;SLC6A19;SMPDL3A;FGF9;C2CD4A;PYY
TS_Small_Intestine_intestinal enteroendocrine cell	Adult	Digestive system	TS_Small_Intestine	intestinal enteroendocrine cell	Endocrine cell	CL:0000163	Small intestine	UBERON:0002108	0.186815	0.696159	0.811439	0.887513	0.0518255	0.980361	CAMK2N1;ATF3;VIL1;TMEM45A;SLC6A19;SLC22A4;PKIB;SMPDL3A;ENPP1;MT1E;PYY;SCPEP1
AdultAscendingColon_B cell	Adult	Digestive system	AdultAscendingColon	B cell	B cell	CL:0000236	Ascending colon	UBERON:0001156	0.552951	0.636049	0.902583	0.892691	0.049299	0.980361	ANXA6;CD79A;GRK5;HLA-DOB;S100A4;SNX10;SOCS1;WIPF1
Fetal_HCA_Intestine_Chromaffin cells	Fetal	Digestive system	Fetal_HCA_Intestine	Chromaffin cells	Neuron	CL:0000540	Intestine	UBERON:0000160	0.866154	0.79114	0.950554	0.96634	0.01487	0.980361	RGS2;SATB2;ITPR1;PKIB;PRKCH;PYY
FetalIntestine_Fetal epithelial progenitor	Fetal	Digestive system	FetalIntestine	Fetal epithelial progenitor	Epithelial fate stem cell	CL:0000036	Intestine	UBERON:0000160	0.937845	0.793404	0.969373	0.971016	0.0127735	0.980361	ANXA6;FADS1;NUCB2;PLS3;VIM
FetalIntestine_Fetal neuron	Fetal	Digestive system	FetalIntestine	Fetal neuron	Neuron	CL:0000540	Intestine	UBERON:0000160	0.937845	0.79501	0.969373	0.971423	0.0125915	0.980361	ACSL4;ANXA6;FADS1;PHLDA1;SNX10
TS_Large_Intestine_goblet cell	Adult	Digestive system	TS_Large_Intestine	goblet cell	Goblet cell	CL:0000160	Large intestine	UBERON:0000059	0.998943	0.807649	0.995572	0.979413	0.00903398	0.980361	MUC1;FGFR2

## Sheet: Table S9
Supplementary Table 9 Cell type-specific expression analysis (CSEA) on GR- and TET2-related UC DEGs after filtering
Tissue_cell_type_name	Developmental_stage	Organ_system	Tissue	Specific_cell_type	General_cell_type	Cell_Ontology_ID	General_tissue_name	Uber_anatomy_ontology_ID	input_list_raw_p	input_list_permutated_p	input_list_rank_p	input_list_combined_p	input_list_combined_log10p	FDR	Genes
TS_Large_Intestine_enterocyte of epithelium of large intestine	Adult	Digestive system	TS_Large_Intestine	enterocyte of epithelium of large intestine	Enterocyte	CL:0000584	Large intestine	UBERON:0000059	4.22e-51	4.12e-05	0.00442804	3.01e-06	5.52125	0.00135952	CAMK2N1;SERINC2;MAST2;PDZK1IP1;HOOK1;SELENBP1;CGN;EFNA1;MUC1;IGSF9;NR5A2;BTG2;ATF3;NVL;RHOU;DQX1;MRPL35;CNNM4;FHL2;SATB2;VIL1;SLC23A3;DGKD;ACAA1;LAMB2;CHDH;CLCN2;S100P;ZNF608;MGAT4B;FOXQ1;NQO2;SLC22A23;GCNT2;MBOAT1;GMNN;IER3;PKIB;ENPP1;FRMD1;HOXA6;BAIAP2L1;CLDN15;NAPEPLD;FOXP2;AHCYL2;ADAM9;SLC20A2;GGH;ZBTB10;NDRG1;SLC39A4;IFT74;PIP5K1B;CRAT;PBLD;SEMA4G;PNLIPRP2;CDHR5;ADM;PRR5L;STARD10;OAF;LRP6;RN…
TS_Small_Intestine_enterocyte of epithelium of small intestine	Adult	Digestive system	TS_Small_Intestine	enterocyte of epithelium of small intestine	Enterocyte	CL:0000584	Small intestine	UBERON:0002108	1.39e-55	0.000123513	0.00295203	5.77e-06	5.23884	0.00192681	AGMAT;CAMK2N1;SERINC2;MAST2;HOOK1;SELENBP1;CGN;EFNA1;PBX1;NR5A2;ATF3;RHOU;TGFA;DQX1;RETSAT;FHL2;TMEM37;SATB2;STRADB;KLF7;VIL1;CYP27A1;DGKD;ACAA1;LAMB2;CHDH;TNIK;CLCN2;HSD17B11;ABCG2;AP1AR;SLC6A19;RGMB;ZNF608;ARHGEF37;MGAT4B;SERPINB6;NQO2;SLC22A23;GCNT2;MBOAT1;IER3;PKIB;SMPDL3A;ENPP1;GRB10;BAIAP2L1;CLDN15;NAPEPLD;FOXP2;AHCYL2;SLC25A37;ADAM9;SLC20A2;ASPH;NDRG1;SLC39A4;PIP5K1B;SLC44A1;HSDL2;CRAT;PBL…
TS_Small_Intestine_immature enterocyte	Adult	Digestive system	TS_Small_Intestine	immature enterocyte	Enterocyte	CL:0000584	Small intestine	UBERON:0002108	2.86e-59	0.000205854	0.00221402	7.11e-06	5.1481	0.00192681	PGD;AGMAT;CAMK2N1;SERINC2;PDZK1IP1;CPT2;HOOK1;PGM1;ABCD3;SELENBP1;CGN;EFNA1;MUC1;PBX1;NR5A2;BTG2;ATF3;RHOU;TGFA;RETSAT;MRPL35;FHL2;TMEM37;STRADB;VIL1;CYP27A1;SEC13;ACAA1;HIGD1A;SLC25A20;TNIK;LETM1;HSD17B11;CASP6;AP1AR;SLC6A19;ZNF608;MGAT4B;FOXQ1;SERPINB6;SLC22A23;GCNT2;C6orf136;PSMB9;SMPDL3A;NCOA7;CLDN15;NAPEPLD;AHCYL2;SLC25A37;ADAM9;ASPH;DEPTOR;NDRG1;SLC39A4;PIP5K1B;SLC44A1;HSDL2;CRAT;EGR2;PBLD;…
TS_Large_Intestine_immature enterocyte	Adult	Digestive system	TS_Large_Intestine	immature enterocyte	Enterocyte	CL:0000584	Large intestine	UBERON:0000059	7.03e-53	0.00045288	0.00369004	2.39e-05	4.62159	0.00297717	PGD;AGMAT;CAMK2N1;SERINC2;PDZK1IP1;CPT2;HOOK1;PGM1;PRKACB;ABCD3;VAV3;SELENBP1;CGN;EFNA1;MUC1;PBX1;NR5A2;TGFA;RETSAT;MRPL35;CNNM4;FHL2;SATB2;TRAK2;VIL1;SEC13;ACAA1;HIGD1A;CHDH;GXYLT2;TNIK;LETM1;HSD17B11;CASP6;AP1AR;MGAT4B;SERPINB6;SLC22A23;GMNN;C6orf136;PKIB;SMPDL3A;NCOA7;SOD2;HOXA3;HOXA7;CLDN15;NAPEPLD;AHCYL2;ADAM9;ASPH;GGH;SLC39A4;IFT74;SLC44A1;TMEM38B;HSDL2;PBLD;EIF4EBP2;PANK1;SEMA4G;ADD3;PNLIP…
AdultTransverseColon_Epithelial cell	Adult	Digestive system	AdultTransverseColon	Epithelial cell	Epithelial cell	CL:0000066	Transverse colon	UBERON:0001157	1.32e-24	4.12e-05	0.0782288	4.4e-05	4.35704	0.00297717	ABCD3;ABCG2;ACAA1;ACADS;ADM;AHCYL2;ANXA2;APPL2;BEST4;C6orf136;CA12;CAMK2N1;CDHR5;CGN;CHCHD10;CLCN2;CNNM4;CRAT;DUOX2;EFNA1;EIF4EBP2;EPB41L3;ERBB3;FHL2;FXYD3;GGT6;GLTP;HIGD1A;HSD17B11;IER3;IGSF9;KLF5;LETM1;MARVELD3;MGAT4B;MIER1;MMP28;MPST;MT1E;MT1M;MT2A;MUC1;MYO1A;NDRG1;OAF;OPN3;PBLD;PCK1;PCK2;PDE8A;PDZK1IP1;PEX26;PIP5K1B;PKIB;PLCD3;PPM1A;PRR15L;PRR5L;RETSAT;RHOU;SATB2;SELENBP1;SEMA6D;SEPHS2;SERINC…
AdultTransverseColon_Dendritic cell	Adult	Digestive system	AdultTransverseColon	Dendritic cell	Dendritic cell	CL:0000451	Transverse colon	UBERON:0001157	4.1e-18	4.12e-05	0.128413	6.95e-05	4.15786	0.00297717	ACP5;ADAM19;ANXA2;ANXA6;BCL6;BIRC3;BST2;C1orf54;C3AR1;CCDC88A;CD300A;CD68;CEBPB;CFP;CLEC7A;CNN2;CSF3R;CXCL16;CXCL9;DUSP1;DUSP10;ELOVL5;ENTPD1;FADS1;FADS2;FCGR2A;FMNL1;FOSB;GNAI2;HCST;HLA-DOB;ICAM1;IER3;ITGB2;KLF7;LATS2;LGALS1;LYZ;MAFB;MAP4K1;NAPSB;NFKBIZ;NQO2;NR4A2;PFKFB3;PLXND1;PSMB9;PSME2;RGS2;S100A4;SCPEP1;SERPINF1;SERPING1;SFMBT2;SLAMF8;SNX10;SOCS3;SOD2;TRPV2;TSC22D3;TYROBP;UBE2L6;VAMP5;VIM;W…
AdultTransverseColon_Macrophage	Adult	Digestive system	AdultTransverseColon	Macrophage	Macrophage	CL:0000235	Transverse colon	UBERON:0001157	2.52e-16	4.12e-05	0.157934	8.42e-05	4.07489	0.00297717	ACP5;ACSL4;ADAM9;BST2;C1orf54;C3AR1;CCDC88A;CD300A;CD68;CEBPB;CFP;CLEC7A;CSF3R;CXCL16;CXCL9;DEGS1;DOK3;DRAM1;DUSP1;DYSF;ELOVL5;EMP3;ENTPD1;EPB41L3;FADS1;FCGR2A;FMNL1;GNAI2;GPCPD1;HCST;HIF1A;ICAM1;IER3;ITGAV;ITGB2;KLF7;LGALS1;LYZ;MAFB;MMP25;MYO1G;NR4A2;PFKFB3;PHLDA1;PLTP;PLXND1;RGS2;S100A4;SCPEP1;SERPINF1;SERPING1;SFMBT2;SH3BP5;SLAMF8;SNX10;SOD2;TRPV2;TYROBP;VAMP5;VCAN;VIM;WIPF1;ZFP36L1
TS_Large_Intestine_mature enterocyte	Adult	Digestive system	TS_Large_Intestine	mature enterocyte	Enterocyte	CL:0000584	Large intestine	UBERON:0000059	3.42e-14	4.12e-05	0.195203	0.000102319	3.99004	0.00297717	SERINC2;RIMKLA;MAST2;SELENBP1;CGN;EFNA1;MUC1;IGSF9;RHOU;OPN3;TGFA;DQX1;RETSAT;CNNM4;TMEM37;VIL1;ACAA1;HIGD1A;CLCN2;LETM1;ATP8A1;ABCG2;SLC6A19;SLC22A4;SFXN1;MGAT4B;PKIB;SMPDL3A;FRMD1;AHCYL2;SLC20A2;PIP5K1B;PBLD;CDHR5;PRR5L;OAF;ERBB3;MYO1A;SLC41A2;APPL2;ACADS;PCK2;SEMA6D;CA12;MT2A;MT1E;MT1M;CMTM4;MARVELD3;GGT6;MMP28;PLCD3;PRR15L;ABCA5;EPB41L3;FXYD3;TMC4;BTBD3;PCK1;PEX26
AdultTransverseColon_B cell (Plasmocyte)	Adult	Digestive system	AdultTransverseColon	B cell (Plasmocyte)	B cell	CL:0000236	Transverse colon	UBERON:0001157	1.9e-10	4.12e-05	0.299631	0.000151771	3.81881	0.00297717	ADAM19;ANXA6;BCL2L11;BIRC3;BST2;BTG2;CCDC167;CD180;CD40;CD79A;CFLAR;CITED2;CREB3L2;CRELD2;DDIT4;DENND1C;DNAJB9;DOK3;DUSP1;EAF2;EMB;EMP3;ENTPD1;FOSB;FUT8;GYPC;HCST;HLA-DOB;HSPA13;IKZF3;ITGAL;KCNA3;LGALS1;MAP4K1;MEI1;MTHFD2;NUCB2;PDK1;RGS2;SCPEP1;SDF2L1;SEC14L1;SFMBT2;SLC1A4;SYTL1;TMEM45A;TNFRSF17;TSC22D3;VAMP5;VIM;WIPF1;XBP1
AdultSigmoidColon_Enterocyte progenitor	Adult	Digestive system	AdultSigmoidColon	Enterocyte progenitor	Enterocyte	CL:0000584	Sigmoid colon	UBERON:0001159	2.36e-10	4.12e-05	0.302583	0.000153144	3.8149	0.00297717	ACADS;AIFM3;BEST4;CA12;CAMK2N1;CDHR5;CHCHD10;CLDN15;DQX1;EFNA1;EPN3;ERBB3;FRMD1;FXYD3;GGT6;HOOK1;KLF5;MARVELD3;MGAT4B;MLXIP;MMP28;MPST;MT1E;MT2A;MUC1;MYO1A;NAPEPLD;NCOA7;NEDD4L;PBLD;PCK1;PCK2;PXMP2;PYY;RGMB;S100P;SATB2;SELENBP1;SEMA4G;SEMA6D;SERINC2;SLC22A23;STARD10;TLE2;TMC4;TST;VIL1;YBX2;ZG16;ZNF57
AdultTransverseColon_Enterocyte	Adult	Digestive system	AdultTransverseColon	Enterocyte	Enterocyte	CL:0000584	Transverse colon	UBERON:0001157	1.67e-09	4.12e-05	0.326937	0.000164428	3.78402	0.00297717	ADM;AKAP1;ANXA2;ASPH;ATF3;BAG3;BAIAP2L1;BHLHE40;BTG2;CA12;CAMK2N1;CHCHD10;CHDH;DNAJC10;EFNA1;ERBB3;FGFR2;FHL2;FOS;FOSB;FXYD3;GPCPD1;HIF1A;HIGD1A;HSPA5;HSPA6;IER3;IL17RB;KDELR3;KLF5;KLK1;MAFF;MUC1;NCOA7;NDRG1;NEDD4L;OAF;P4HB;PCK1;PNP;PTPN21;S100P;SLC22A23;STARD10;TAPBP;TMC4;VIL1;WNK4;XBP1;ZG16
AdultSigmoidColon_Epithelial cell	Adult	Digestive system	AdultSigmoidColon	Epithelial cell	Epithelial cell	CL:0000066	Sigmoid colon	UBERON:0001159	5.06e-08	4.12e-05	0.382288	0.000189804	3.7217	0.00297717	ACAA1;ACADS;AHCYL2;APPL2;BEST4;CA12;CAMK2N1;CDHR5;CGN;CLCN2;CNNM4;DEPDC7;DGKD;DUOX2;DUOXA2;EFNA1;EPB41L3;ERBB3;FHL2;FXYD3;GGT6;HIGD1A;IGSF9;LETM1;MPST;MT1E;MT1M;MT2A;OAF;PKIB;PLCD3;PRR15L;PSMB10;PSME2;PTPN21;RETSAT;SERINC2;SFXN1;SLC16A1;SLC23A3;SLC39A4;SLC6A19;SMPDL3A;TMEM37;TST
AdultAscendingColon_Enterocyte progenitor	Adult	Digestive system	AdultAscendingColon	Enterocyte progenitor	Enterocyte	CL:0000584	Ascending colon	UBERON:0001156	5.66e-08	4.12e-05	0.384502	0.000190812	3.7194	0.00297717	ACADS;ACO2;ANXA2;BAIAP2L1;CA12;CASP6;CHCHD10;CHDH;CRAT;DEPTOR;EFNA1;ERBB3;FHL2;FOS;FXYD3;GGH;GMNN;HSD17B11;KLF5;MLXIP;MPST;MT1E;MT2A;PBLD;PCCA;PCK1;PCK2;PDE8A;PDZK1IP1;PKIB;PLCD3;PRR15L;S100P;SATB2;SELENBP1;SERINC2;SERPINB6;SLC39A4;STARD10;TMC4;TNFRSF12A;TST;VIL1;ZNF57
Fetal_HCA_Intestine_Myeloid cells	Fetal	Digestive system	Fetal_HCA_Intestine	Myeloid cells	Myeloid cell	CL:0000763	Intestine	UBERON:0000160	8.3e-14	8.23e-05	0.2	0.000197852	3.70366	0.00297717	CSF3R;S100A4;SLAMF8;FCGR2A;RGS2;CD55;LYST;CCDC88A;SLC1A4;MTHFD2;NR4A2;WIPF1;ITPR1;IRAK2;SH3BP5;GNAI2;EAF2;BCL6;CD180;ADAM19;DOK3;MAP3K5;SNX10;PFKFB3;SFMBT2;ENTPD1;FCHSD2;BIRC3;C3AR1;CLEC7A;LYZ;DRAM1;SLC41A2;HIF1A;ZFP36L1;MMP25;ITGAL;SERPINF1;CD68;FMNL1;PITPNC1;CD300A;SEC14L1;EPB41L3;DENND1C;ICAM1;BST2;HCST;TYROBP;MAP4K1;NAPSB;GPCPD1;MAFB;PLTP;CD40;ITGB2;CFP;ACSL4
AdultTransverseColon_Enterocyte progenitor	Adult	Digestive system	AdultTransverseColon	Enterocyte progenitor	Enterocyte	CL:0000584	Transverse colon	UBERON:0001157	1.6e-06	8.23e-05	0.464207	0.000427036	3.36954	0.00393628	ACADS;ADD3;AGMAT;AKAP1;ANXA2;CASP6;CAT;CHCHD10;CLDN15;ECH1;EFNA1;FXYD3;GGH;GMNN;HSD17B11;HSDL2;KLF5;KPNA2;MGAT4B;MIF;MLXIP;MPST;MRPL35;MT1E;MUC1;NCOA7;PCCA;PCK1;PGD;PMAIP1;PPA1;PRR15L;PSME2;PXMP2;RGMB;SATB2;SELENBP1;SERPINB6;SLC39A4;STARD10;TLE2;TNFRSF12A;VIL1
TS_Large_Intestine_plasma cell	Adult	Digestive system	TS_Large_Intestine	plasma cell	Plasma cell	CL:0000786	Large intestine	UBERON:0000059	1.12e-28	0.000823418	0.0501845	0.000458439	3.33872	0.00416853	GRHL3;SYTL1;CTH;KCNA3;S100A4;FCGR2A;HSPA6;CD55;DEGS1;CCDC88A;SLC1A4;MTHFD2;VAMP5;BCL2L11;GYPC;PDK1;CFLAR;AP1S3;IRAK2;SEC13;SH3BP5;GNAI2;TMEM45A;EAF2;CD180;ANXA6;ADAM19;DOK3;HLA-DOB;PSMB9;TAPBP;CCDC167;MYO1G;DNAJB9;CREB3L2;DEPTOR;SLC44A1;HSPA5;SFMBT2;VIM;PPA1;DDIT4;ENTPD1;NUCB2;FCHSD2;BIRC3;SLC35F2;HYOU1;DRAM1;STX2;MYCBP2;PNP;PSME2;FUT8;TNFRSF17;ITGAL;SLC12A4;IKZF3;FMNL1;SCPEP1;CD300A;SEC14L1;P4HB…
Fetal_HCA_Intestine_Intestinal epithelial cells	Fetal	Digestive system	Fetal_HCA_Intestine	Intestinal epithelial cells	Epithelial cell	CL:0000066	Intestine	UBERON:0000160	4.26e-07	0.000123513	0.433579	0.000580234	3.2364	0.00467986	AGMAT;CAMK2N1;CGN;NR5A2;VIL1;TNIK;HSD17B11;CASP6;SLC6A19;SERPINB6;SLC22A23;GCNT2;NCOA7;IGF2BP3;BAIAP2L1;DEPTOR;NDRG1;SLC39A4;DENND4C;PIP5K1B;SLC44A1;PBLD;SEMA4G;ADD3;CDHR5;STARD10;ERBB3;MYO1A;KLF5;PCK2;ANXA2;PDE8A;MT2A;MT1E;MARVELD3;AKAP1;ABCA5;P4HB;NEDD4L;CREB3L3;FXYD3;TMC4;MPST;ACO2
TS_Large_Intestine_monocyte	Adult	Digestive system	TS_Large_Intestine	monocyte	Monocyte	CL:0000576	Large intestine	UBERON:0000059	6.5e-37	0.00387006	0.0214022	0.000861307	3.06484	0.00595444	CTH;ARHGAP29;ABCD3;SLC16A4;ECM1;S100A4;HSPA6;BTG2;SLC41A1;ATF3;DEGS1;LYST;NID1;VAMP5;NR4A2;ITGAV;KLF7;CYP27A1;ITPR1;BHLHE40;SH3BP5;LAMB2;GNAI2;GXYLT2;NFKBIZ;PLXND1;BCL6;ART3;PTPN13;TSPAN5;RGMB;ARHGEF37;ANXA6;SERPINB6;MYLIP;IER3;ELOVL5;LAMA4;CITED2;SOD2;IGF2BP3;HOXA5;CREB3L2;ASPH;NDRG1;SLC44A1;PFKFB3;VIM;EGR2;DDIT4;ADD3;BAG3;DEPDC7;CAT;SERPING1;FADS2;FADS1;BIRC3;LRP6;RND1;ERBB3;PHLDA1;LATS2;IRF9;Z…
TS_Small_Intestine_neutrophil	Adult	Digestive system	TS_Small_Intestine	neutrophil	Neutrophil	CL:0000775	Small intestine	UBERON:0002108	1.46e-26	0.00144098	0.0664207	0.000981437	3.00814	0.00645557	PGD;PLOD1;CSF3R;C1orf54;SLAMF8;FCGR2A;MR1;OPN3;CCDC88A;SLC1A4;DYSF;ITGAV;CFLAR;KLF7;ITPR1;IRAK2;SH3BP5;LAMB2;GNAI2;WNT5A;PLXNA1;PLXND1;BCL6;CD180;HOMER1;VCAN;SNCAIP;DOK3;IER3;PKIB;SMPDL3A;SOD2;SNX10;HOXA5;MYO1G;ADAM9;PFKFB3;SFMBT2;EGR2;ENTPD1;ADM;CAT;SERPING1;FADS1;HYOU1;C3AR1;CLEC7A;LYZ;PHLDA1;DRAM1;LATS2;HIF1A;MMP25;MT2A;SERPINF1;CXCL16;CD68;FMNL1;SCPEP1;CD300A;SPHK1;SOCS3;EPB41L3;OSBPL1A;ICAM1…
AdultSigmoidColon_B cell (Plasmocyte)	Adult	Digestive system	AdultSigmoidColon	B cell (Plasmocyte)	B cell	CL:0000236	Sigmoid colon	UBERON:0001159	5.69e-06	0.000205854	0.507749	0.00106259	2.97364	0.00680923	BAG3;BIRC3;BST2;BTG2;CCDC167;CD79A;CFLAR;CITED2;CREB3L2;CRELD2;DDIT4;DNAJB9;DUSP1;EAF2;EMP3;FCHSD2;HLA-DOB;HSPA13;HSPA5;HSPA6;HYOU1;ICAM1;KCNA3;LGALS1;MEI1;MIF;MTHFD2;NUCB2;P4HB;PDK1;PSMB9;RGS2;RND1;SDF2L1;SFMBT2;SYTL1;TAP2;TNFRSF17;TSC22D3;XBP1
FetalIntestine_Endothelial cell	Fetal	Digestive system	FetalIntestine	Endothelial cell	Endothelial cell	CL:0000115	Intestine	UBERON:0000160	2.24e-08	0.000329367	0.360886	0.0011931	2.92332	0.00721719	ABCG2;ADM;ANXA2;ANXA6;ARHGAP29;ARHGEF3;C1orf54;CCDC88A;CD40;CRIP2;DDIT4;DEGS1;DYSF;EFNA1;ELOVL5;ENTPD1;FADS1;FADS2;FAM167B;FGD5;GNAI2;GRB10;GYPC;ICAM1;LAMA4;LGALS1;MAFB;MMP28;NID1;NID2;PCSK6;PIM3;PLS3;PLXND1;PRKCH;PSMB9;RND1;ROBO1;SEC14L1;SERPING1;SH3BP5;SOCS3;TSC22D3;TSPAN5;VAMP5;VIM;ZFP36L1
TS_Small_Intestine_plasma cell	Adult	Digestive system	TS_Small_Intestine	plasma cell	Plasma cell	CL:0000786	Small intestine	UBERON:0002108	1.62e-24	0.00247025	0.0804428	0.00189248	2.72297	0.00960417	SYTL1;PGM1;S100A4;BTG2;CCDC88A;SLC1A4;MTHFD2;VAMP5;BCL2L11;GYPC;PDK1;CFLAR;IRAK2;SEC13;SH3BP5;TMEM45A;EAF2;CD180;ANXA6;ADAM19;DOK3;HLA-DOB;TAPBP;CCDC167;DNAJB9;CREB3L2;GGH;DEPTOR;PIP5K1B;SLC44A1;TMEM38B;HSPA5;SFMBT2;VIM;DDIT4;ENTPD1;NUCB2;FCHSD2;BIRC3;SLC35F2;HYOU1;DRAM1;LATS2;PSME2;IRF9;FUT8;TNFRSF17;PSMB10;SLC12A4;IKZF3;IFI35;FMNL1;SCPEP1;CD300A;SPHK1;SEC14L1;P4HB;ICAM1;ACP5;BST2;IGFLR1;CD79A;E…
TS_Small_Intestine_monocyte	Adult	Digestive system	TS_Small_Intestine	monocyte	Monocyte	CL:0000576	Small intestine	UBERON:0002108	4.13e-30	0.00469348	0.0428044	0.00191112	2.71871	0.00962663	ARHGAP29;ABCD3;ECM1;PBX1;BTG2;ATF3;LYST;NID1;VAMP5;ITGAV;KLF7;CYP27A1;ITPR1;BHLHE40;SH3BP5;LAMB2;GNAI2;GXYLT2;PLXND1;BCL6;ART3;PTPN13;VCAN;RGMB;MYLIP;IER3;LAMA4;SOD2;HOXA2;HOXA5;CREB3L2;ASPH;NDRG1;SLC44A1;PFKFB3;VIM;EGR2;ADD3;BAG3;DEPDC7;SERPING1;FADS2;FADS1;OAF;LRP6;ERBB3;PHLDA1;LATS2;IRF9;NID2;ZFP36L1;FOS;CRIP2;DUOX2;SEMA6D;ANXA2;TNFRSF12A;MT2A;MT1E;MT1M;SLC12A4;MMP28;FKBP10;IFI35;GJC1;PLCD3;HO…
Fetal_HCA_Intestine_Vascular endothelial cells	Fetal	Digestive system	Fetal_HCA_Intestine	Vascular endothelial cells	Endothelial cell	CL:0000115	Intestine	UBERON:0000160	1.07e-06	0.000864589	0.457565	0.00349521	2.45653	0.0137276	FAM167B;ARHGAP29;VAV3;C1orf54;EFNA1;LYST;DYSF;VAMP5;CFLAR;KLF7;DGKD;FGD5;SH3BP5;GNAI2;ARHGEF3;PLXND1;ATP8A1;ABCG2;ADAM19;LAMA4;GRB10;SFMBT2;VIM;DDIT4;ENTPD1;GRK5;FCHSD2;RND1;NID2;PRKCH;HIF1A;CRIP2;MMP28;PITPNC1;SEC14L1;SOCS3;ICAM1;BTBD3;MAFB;CD40;TMEM184B;PIM3;PLS3
TS_Large_Intestine_fibroblast	Adult	Digestive system	TS_Large_Intestine	fibroblast	Fibroblast	CL:0000057	Large intestine	UBERON:0000059	1.37e-34	0.0186504	0.0258303	0.00416136	2.38076	0.0151985	ARHGAP29;SLC16A4;ANP32E;C1orf54;ECM1;S100A4;RGS5;PBX1;MR1;RGS2;BTG2;SLC41A1;ATF3;DEGS1;NID1;CCDC88A;MTHFD2;VAMP5;GYPC;NR4A2;ITGAV;KLF7;CYP27A1;FGD5;SH3BP5;HIGD1A;LAMB2;WNT5A;ROBO1;TMEM45A;NFKBIZ;BCL6;SETD7;VCAN;ANXA6;DUSP1;NQO2;MYLIP;LAMA4;SMPDL3A;NCOA7;CITED2;SOD2;CREB3L2;SLC25A37;ASPH;VIM;EGR2;ADD3;GRK5;BAG3;ADM;SERPING1;OAF;CLMP;PHLDA1;DRAM1;LATS2;MYCBP2;NID2;ZFP36L1;FOS;DUOX2;LOXL1;TNFRSF12A;…
TS_Small_Intestine_fibroblast	Adult	Digestive system	TS_Small_Intestine	fibroblast	Fibroblast	CL:0000057	Small intestine	UBERON:0002108	2.18e-29	0.0133394	0.0464945	0.00520072	2.28394	0.0177506	ARHGAP29;C1orf54;ECM1;SELENBP1;RGS5;PBX1;BTG2;SLC41A1;NID1;CCDC88A;VAMP5;ITGAV;FGD5;SH3BP5;HIGD1A;LAMB2;WNT5A;GXYLT2;ROBO1;TMEM45A;BCL6;SETD7;VCAN;ANXA6;MYLIP;IER3;LAMA4;SOD2;HOXA2;HOXA3;HOXA5;HOXA6;HOXA7;FOXP2;CREB3L2;ADAM9;ASPH;VIM;GRK5;BAG3;ADM;SERPING1;FADS1;OAF;CLMP;PHLDA1;DRAM1;LATS2;NID2;ZFP36L1;CRIP2;DUOX2;DUOXA2;CA12;LOXL1;PDE8A;PCSK6;TNFRSF12A;MT2A;MT1M;SLC12A4;ZCCHC14;SERPINF1;FKBP10;G…
TS_Large_Intestine_large intestine goblet cell	Adult	Digestive system	TS_Large_Intestine	large intestine goblet cell	Goblet cell	CL:0000160	Large intestine	UBERON:0000059	3.58e-18	0.00518753	0.126199	0.00545425	2.26326	0.0182482	CAMK2N1;SYTL1;SERINC2;MAST2;CGN;EFNA1;MUC1;HSPA6;ATF3;CNNM4;FHL2;DNAJC10;SATB2;VIL1;DGKD;HYAL1;CHDH;IL17RB;S100P;NQO2;SLC22A23;IER3;ENPP1;FRMD1;BAIAP2L1;FOXP2;ADAM9;ASPH;NDRG1;PIP5K1B;FGFR2;CDHR5;ADM;NUCB2;PRR5L;STARD10;OAF;LRP6;RND1;ERBB3;MYO1A;LYZ;APPL2;KLF5;C2CD4A;CA12;ZG16;MARVELD3;GGT6;WNK4;HOXB5;PDK2;EPN3;AKAP1;ABCA5;OSBPL1A;NEDD4L;ANGPTL4;FXYD3;KLK1;TMC4;MAFB;PCK1;AIFM3;CHCHD10;XBP1;KDELR3
Fetal_HCA_Intestine_Lymphoid cells	Fetal	Digestive system	Fetal_HCA_Intestine	Lymphoid cells	Innate lymphoid cell	CL:0001065	Intestine	UBERON:0000160	3.47e-11	0.0029643	0.270849	0.00652524	2.1854	0.0207065	SYTL1;LCK;VAV3;S100A4;SLC41A1;CD55;DUSP10;LYST;SLC1A4;GYPC;NR4A2;WIPF1;ITPR1;GNAI2;ARHGEF3;TSPAN5;EMB;ANXA6;ADAM19;TAP2;PSMB9;TAPBP;ELOVL5;ENPP1;MAP3K5;HIVEP2;SYTL3;SNX10;MYO1G;PFKFB3;SFMBT2;DDIT4;BIRC3;CD3D;CD3G;MYCBP2;PRKCH;HIF1A;ZFP36L1;ITGAL;TRPV2;IKZF3;FMNL1;PITPNC1;CD300A;CNN2;DENND1C;ICAM1;HCST;MAP4K1;CD79A;GPCPD1;ITGB2
AdultTransverseColon_Mast cell	Adult	Digestive system	AdultTransverseColon	Mast cell	Mast cell	CL:0000097	Transverse colon	UBERON:0001157	9.89e-05	0.00164684	0.591513	0.00772868	2.11189	0.0231756	ACSL4;ANXA6;BHLHE40;BIRC3;BST2;C3AR1;CCDC88A;CD300A;DDIT4;DENND4C;DUSP1;DUSP10;ELOVL5;EMP3;FOSB;HIF1A;ICAM1;IKZF3;KLF7;LGALS1;LYST;MYO1G;NFKBIZ;NQO2;NR4A2;PBX1;PLK3;RGS2;S100A4;SOCS1;STX2;SYTL3;TGFA;TSC22D3;TYROBP;VIM;WIPF1;ZFP36
Fetal_HCA_Intestine_Lymphatic endothelial cells	Fetal	Digestive system	Fetal_HCA_Intestine	Lymphatic endothelial cells	Endothelial cell	CL:0000115	Intestine	UBERON:0000160	1.46e-05	0.00185269	0.532103	0.00780972	2.10736	0.0233602	ARHGAP29;VAV3;SLC41A1;LYST;NID1;CCDC88A;DYSF;VAMP5;GYPC;WIPF1;ITGAV;FGD5;SH3BP5;GNAI2;ARHGEF3;PLXND1;TSPAN5;SETD7;HOMER1;SNCAIP;ADAM19;SLC22A23;LAMA4;HIVEP2;GRB10;SFMBT2;VIM;ADD3;PRR5L;SERPING1;FCHSD2;MYCBP2;PCCA;PRKCH;CRIP2;PCSK6;MMP25;PITPNC1;SPHK1;PLS3
FetalIntestine_Dendritic cell	Fetal	Digestive system	FetalIntestine	Dendritic cell	Dendritic cell	CL:0000451	Intestine	UBERON:0000160	9.53e-13	0.00469348	0.228782	0.00841479	2.07496	0.0241257	ABCG2;ADAM19;BIRC3;BST2;C1orf54;C3AR1;CCDC88A;CD180;CD300A;CD40;CFP;CLEC7A;CNN2;CSF3R;DEGS1;EAF2;EMP3;ENTPD1;FADS1;FADS2;FMNL1;GNAI2;GPCPD1;HCST;HLA-DOB;HSPA6;IRAK2;ITGAL;ITGB2;KPNA2;LGALS1;LYST;LYZ;MAFB;MAP3K5;MAP4K1;MMP25;MTHFD2;NAPSB;NR4A2;PKIB;PSMB10;PSMB9;PSME2;RGS2;S100A4;SERPINF1;SFMBT2;SLAMF8;SLC41A2;SNX10;TAP2;TYROBP;UBE2L6;VIM;WIPF1
TS_Small_Intestine_small intestine goblet cell	Adult	Digestive system	TS_Small_Intestine	small intestine goblet cell	Goblet cell	CL:0000160	Small intestine	UBERON:0002108	6.87e-22	0.0108279	0.099262	0.00842175	2.0746	0.0241257	CAMK2N1;SERINC2;MAST2;SELENBP1;CGN;EFNA1;BTG2;ATF3;DQX1;FHL2;DNAJC10;SATB2;VIL1;DGKD;HYAL1;CHDH;IL17RB;PLXNA1;S100P;ABCG2;HOMER1;SERPINB6;NQO2;SLC22A23;IER3;PKIB;ENPP1;BAIAP2L1;CLDN15;FOXP2;AHCYL2;ASPH;NDRG1;FGFR2;CDHR5;ADM;NUCB2;PRR5L;STARD10;HYOU1;OAF;LRP6;RND1;KRT7;MYO1A;APPL2;KLF5;FUT8;C2CD4A;CA12;TNFRSF12A;ZG16;MARVELD3;GGT6;CXCL16;MMP28;WNK4;ABCA5;P4HB;OSBPL1A;NEDD4L;ANGPTL4;FXYD3;LYPD5;KLK…
AdultSigmoidColon_Mast cell	Adult	Digestive system	AdultSigmoidColon	Mast cell	Mast cell	CL:0000097	Sigmoid colon	UBERON:0001159	0.000317267	0.00177035	0.628782	0.00868329	2.06132	0.0246664	ACSL4;AP1S3;BIRC3;C3AR1;CD300A;CXCL16;DDIT4;DEGS1;DENND1C;DNAJB9;DUSP10;ELOVL5;EMP3;FGF9;FGFR2;FOSB;HSPA5;HYOU1;ICAM1;IER3;IGFLR1;IRAK2;NFKBIZ;NR4A2;P4HB;PLK3;PNLIPRP2;RGS2;S100A4;TRAF3IP2;TSC22D3;TYROBP;VIM;XBP1;ZFP36
AdultSigmoidColon_Stromal cell	Adult	Digestive system	AdultSigmoidColon	Stromal cell	Stromal cell	CL:0000499	Sigmoid colon	UBERON:0001159	6.94e-05	0.00247025	0.583026	0.0108635	1.96403	0.028654	ACP5;ADM;ANXA2;ANXA6;BST2;CD40;CLMP;DUSP1;ECM1;EMP3;FKBP10;FOS;GYPC;HSPA5;KDELR3;LAMA4;LGALS1;NID1;NQO2;PBX1;PLS3;PLTP;S100A4;SCPEP1;SEC22C;SERPINF1;SERPING1;SH3BP5;SLC16A4;SMPDL3A;SOD2;TMEM45A;VAMP5;VCAN;VIM;ZFP36;ZFP36L1
TS_Small_Intestine_cd8-positive, alpha-beta t cell	Adult	Digestive system	TS_Small_Intestine	cd8-positive, alpha-beta t cell	T cell	CL:0000084	Small intestine	UBERON:0002108	1.46e-26	0.0216971	0.0664207	0.0108695	1.96379	0.028654	SYTL1;LCK;MIER1;PRKACB;VAV3;KCNA3;ANP32E;S100A4;HSPA6;SLC41A1;CD55;DUSP10;DEGS1;LYST;DYSF;MTHFD2;VAMP5;BCL2L11;GYPC;NR4A2;WIPF1;CFLAR;ITPR1;GNAI2;ARHGEF3;NFKBIZ;PLXND1;ATP8A1;TSPAN5;EMB;ANXA6;DUSP1;SFXN1;PSMB9;TAPBP;ELOVL5;CITED2;HIVEP2;SYTL3;MYO1G;ZBTB10;HSPA5;PFKFB3;SFMBT2;VIM;NUCB2;BIRC3;CD3D;CD3G;PHLDA1;STX2;FGF9;MYCBP2;PRKCH;HIF1A;FOS;SOCS1;ITGAL;TRPV2;IKZF3;FMNL1;PITPNC1;KPNA2;SEC14L1;RNF13…
AdultAscendingColon_B cell (Plasmocyte)	Adult	Digestive system	AdultAscendingColon	B cell (Plasmocyte)	B cell	CL:0000236	Ascending colon	UBERON:0001156	0.0015338	0.00255259	0.675277	0.0126921	1.89647	0.0316137	BAG3;BCL2L11;BST2;BTG2;CCDC167;CD79A;CFLAR;CITED2;CREB3L2;CRELD2;DDIT4;DNAJB9;DUSP1;EAF2;FUT8;HSPA13;HSPA5;HSPA6;KCNA3;KDELR3;LGALS1;MEI1;NUCB2;P4HB;PDK1;SDF2L1;SLC1A4;SLC35F2;SYTL1;TMEM45A;TNFRSF17;XBP1
AdultSigmoidColon_Dendritic cell	Adult	Digestive system	AdultSigmoidColon	Dendritic cell	Dendritic cell	CL:0000451	Sigmoid colon	UBERON:0001159	3.63e-07	0.00456997	0.42583	0.0140931	1.85099	0.0342225	ATF3;BCL2L11;BIRC3;C1orf54;C3AR1;CAT;CD180;CD300A;CD55;CD68;CEBPB;CFLAR;CFP;CLEC7A;CSF3R;CXCL16;DDIT4;DEPTOR;DUSP1;ENTPD1;FCGR2A;HIF1A;ICAM1;IER3;IGFLR1;IRAK2;ITGB2;KPNA2;LYZ;MAFF;MBOAT1;NAPSB;NFKBIZ;NR4A2;PFKFB3;RGS2;SLAMF8;SOD2;TSHZ1;TYROBP;USP30;ZFP36;ZFP36L1
TS_Small_Intestine_goblet cell	Adult	Digestive system	TS_Small_Intestine	goblet cell	Goblet cell	CL:0000160	Small intestine	UBERON:0002108	9.03e-19	0.0167977	0.119557	0.0144807	1.83921	0.0348782	CAMK2N1;SERINC2;RIMKLA;IGSF9;PBX1;BTG2;ATF3;FHL2;DNAJC10;STRADB;VIL1;CYP27A1;SEC13;FGD5;HIGD1A;CHDH;CASP6;SERPINB6;SLC22A23;IER3;NCOA7;CLDN15;ADAM9;ASPH;DENND4C;SLC44A1;EGR2;ADD3;FGFR2;ADM;STARD10;HYOU1;LRP6;RND1;KRT7;ERBB3;LYZ;MLXIP;KLF5;C2CD4A;TNFRSF12A;MT2A;MT1E;MARVELD3;ZCCHC14;GGT6;CXCL16;CENPV;PRR15L;PDK2;ABCA5;P4HB;CNN2;TLE2;ANGPTL4;FXYD3;SPHK2;KLK1;MKKS;BTBD3;AIFM3;SDF2L1;XBP1;TST;MPST;TM…
AdultAscendingColon_Stromal cell	Adult	Digestive system	AdultAscendingColon	Stromal cell	Stromal cell	CL:0000499	Ascending colon	UBERON:0001156	0.000179097	0.00337601	0.60738	0.0147426	1.83143	0.0352313	ADD3;ADM;ANGPTL4;BCL6;BHLHE40;BTBD3;CEBPB;ECM1;EGR2;FHL2;FKBP10;FOS;HOXA7;IER3;LAMA4;LGALS1;MAFF;NID1;OAF;PBX1;PDK2;PHLDA1;PLTP;PLXND1;PTPN21;S100A4;SERPINF1;SERPING1;SMPDL3A;SOD2;VCAN;VIM;ZCCHC14;ZFP36;ZFP36L1
FetalIntestine_T cell	Fetal	Digestive system	FetalIntestine	T cell	T cell	CL:0000084	Intestine	UBERON:0000160	4.17e-07	0.00580509	0.432472	0.0175418	1.75593	0.0396765	ANP32E;ANXA6;BIRC3;BST2;CCDC167;CD3D;CD3G;CD79A;CNN2;DDIT4;DUSP10;ELOVL5;EMP3;ENTPD1;FADS2;FMNL1;FOSB;GYPC;HCST;HSPA6;IKZF3;ITGAL;ITGB2;KPNA2;LCK;LYPD5;MEI1;MYO1G;NR4A2;PFKFB3;PMAIP1;PRKCH;PSMB9;PSME2;RGS2;S100A4;S100P;SFMBT2;SLC1A4;TAP2;TYROBP;UBE2L6;VAMP5;WIPF1
Fetal_HCA_Intestine_Stromal cells	Fetal	Digestive system	Fetal_HCA_Intestine	Stromal cells	Stromal cell	CL:0000499	Intestine	UBERON:0000160	2.63e-06	0.00592861	0.487085	0.0197731	1.70392	0.0432139	PLOD1;ECM1;PBX1;DUSP10;NID1;CCDC88A;ITPR1;FGD5;WNT5A;ROBO1;TMEM45A;ABCG2;TSPAN5;VCAN;SNCAIP;ANXA6;LAMA4;HOXA3;HOXA6;FOXP2;VIM;GRK5;FGFR2;SERPING1;CLMP;PHLDA1;DRAM1;NID2;ZFP36L1;FOS;PTPN21;ALDH1A2;LOXL1;PCSK6;FKBP10;GJC1;SOCS3;CNN2;BST2;FOSB;EMP3;LGALS1
FetalIntestine_Macrophage	Fetal	Digestive system	FetalIntestine	Macrophage	Macrophage	CL:0000235	Intestine	UBERON:0000160	2.58e-06	0.00695788	0.486347	0.0226342	1.64523	0.0483058	ABCG2;ADAM19;ARHGEF3;BAG3;BST2;C1orf54;C3AR1;CCDC88A;CD300A;CEBPB;CFP;CLEC7A;CRELD2;CSF3R;CXCL16;DUSP1;EAF2;FCGR2A;FOSB;FOXP2;GNAI2;HCST;HSPA6;ICAM1;IER3;ITGAL;ITGB2;ITPR1;LYZ;MAFB;MTHFD2;NR4A2;NUCB2;PITPNC1;PSMB9;RGS2;SERPINF1;SFMBT2;SLC12A4;SLC1A4;TYROBP;ZFP36L1
AdultTransverseColon_T cell	Adult	Digestive system	AdultTransverseColon	T cell	T cell	CL:0000084	Transverse colon	UBERON:0001157	9.89e-05	0.0062168	0.591513	0.0242908	1.61456	0.0508718	ANP32E;ARHGEF3;BIRC3;CD3D;CD3G;DEGS1;DENND1C;DUSP10;ELOVL5;EMB;ENTPD1;GYPC;HCST;IGFLR1;IKZF3;ITPR1;KPNA2;LCK;LGALS1;LYST;MAP4K1;MYO1G;NR4A2;PFKFB3;PHLDA1;PITPNC1;PRKCH;PSMB9;RGS2;S100A4;STX2;SYTL3;TRPV2;TSC22D3;TSPAN5;VAMP5;VIM;WIPF1
TS_Large_Intestine_gut endothelial cell	Adult	Digestive system	TS_Large_Intestine	gut endothelial cell	Endothelial cell	CL:0000115	Large intestine	UBERON:0000059	1.27e-20	0.0436	0.106642	0.0296224	1.52838	0.0599081	FAM167B;ARHGAP29;EFNA1;RGS5;SLC41A1;RHOU;LYST;CCDC88A;DYSF;VAMP5;KLF7;BHLHE40;IRAK2;FGD5;SH3BP5;LAMB2;GNAI2;HYAL1;ARHGEF3;ROBO1;PLXND1;HSD17B11;ABCG2;TSPAN5;SNCAIP;PSMB9;LAMA4;NCOA7;HOXA5;HOXA7;GRB10;ASPH;NDRG1;VIM;ENTPD1;GRK5;BAG3;NUCB2;UBE2L6;SERPING1;FCHSD2;CLEC7A;RND1;PHLDA1;DRAM1;PNP;PRKCH;HIF1A;ZFP36L1;CRIP2;ALDH1A2;MT2A;SLC12A4;MMP28;PITPNC1;SPHK1;SEC14L1;SOCS3;EPB41L3;OSBPL1A;TSHZ1;ICAM1;…
TS_Large_Intestine_cd8-positive, alpha-beta t cell	Adult	Digestive system	TS_Large_Intestine	cd8-positive, alpha-beta t cell	T cell	CL:0000084	Large intestine	UBERON:0000059	1.54e-22	0.0526164	0.095941	0.031746	1.49831	0.0634452	LCK;MIER1;PRKACB;VAV3;ANP32E;S100A4;RGS2;CD55;DUSP10;DEGS1;LYST;SLC1A4;DYSF;MTHFD2;VAMP5;BCL2L11;GYPC;NR4A2;WIPF1;CFLAR;SEC22C;GNAI2;ARHGEF3;ATP8A1;TSPAN5;EMB;HOMER1;ANXA6;SFXN1;TAP2;PSMB9;ELOVL5;HIVEP2;SYTL3;MYO1G;HSPA5;PFKFB3;SFMBT2;VIM;DDIT4;ENTPD1;GRK5;UBE2L6;BIRC3;CD3D;CD3G;STX2;MYCBP2;PRKCH;FOS;SOCS1;ITGAL;TRPV2;IKZF3;FMNL1;PITPNC1;KPNA2;CD300A;SEC14L1;DENND1C;BST2;HCST;TYROBP;MAP4K1;ZFP36;…
TS_Small_Intestine_cd4-positive, alpha-beta t cell	Adult	Digestive system	TS_Small_Intestine	cd4-positive, alpha-beta t cell	T cell	CL:0000084	Small intestine	UBERON:0002108	5.38e-20	0.0483758	0.110701	0.0333615	1.47675	0.0661857	LCK;MIER1;PRKACB;KCNA3;ANP32E;S100A4;RGS2;SLC41A1;CD55;DUSP10;DEGS1;MTHFD2;VAMP5;BCL2L11;GYPC;WIPF1;CFLAR;ITPR1;SEC22C;GNAI2;ARHGEF3;NFKBIZ;PLXND1;PTPN13;TSPAN5;SETD7;EMB;ANXA6;ADAM19;MYLIP;ELOVL5;MAP3K5;CITED2;HIVEP2;SYTL3;MYO1G;DNAJB9;HSPA5;PFKFB3;SFMBT2;VIM;PPA1;DDIT4;UBE2L6;BIRC3;CD3D;CD3G;C3AR1;PHLDA1;STX2;PRKCH;HIF1A;SOCS1;ITGAL;TRPV2;IKZF3;FMNL1;PITPNC1;SEC14L1;DENND1C;BST2;HCST;MAP4K1;ZFP…
FetalIntestine_Fetal mesenchymal progenitor	Fetal	Digestive system	FetalIntestine	Fetal mesenchymal progenitor	Mesenchymal stem cell	CL:0000134	Intestine	UBERON:0000160	0.000316452	0.0106221	0.628044	0.0400933	1.39693	0.0757691	ALDH1A2;ANP32E;ANXA6;BST2;C1orf54;CCDC167;CCDC88A;CDC25B;CLMP;CNN2;DEGS1;ECM1;EMP3;FADS2;FKBP10;FOS;GJC1;GPCPD1;GYPC;HSPA13;KPNA2;LAMA4;LGALS1;NID1;NID2;NUCB2;PHLDA1;PLS3;SERPINF1;SERPING1;SH3BP5;TMEM45A;TSPAN5;VCAN;VIM;WNT5A
TS_Large_Intestine_cd4-positive, alpha-beta t cell	Adult	Digestive system	TS_Large_Intestine	cd4-positive, alpha-beta t cell	T cell	CL:0000084	Large intestine	UBERON:0000059	1.4e-17	0.0693729	0.132841	0.0524078	1.2806	0.0933148	LCK;MIER1;KCNA3;ANP32E;S100A4;RGS2;CD55;DUSP10;DEGS1;MTHFD2;VAMP5;GYPC;WIPF1;CFLAR;ITPR1;BHLHE40;SEC22C;GNAI2;ARHGEF3;PLXND1;PTPN13;TSPAN5;EMB;ADAM19;SFXN1;PSMB9;ELOVL5;HIVEP2;SYTL3;MYO1G;DNAJB9;PFKFB3;SFMBT2;VIM;PPA1;DDIT4;UBE2L6;BIRC3;CD3D;CD3G;C3AR1;PHLDA1;STX2;MYCBP2;PRKCH;SOCS1;ITGAL;TRPV2;IKZF3;FMNL1;PITPNC1;SEC14L1;DENND1C;BST2;IGFLR1;HCST;MAP4K1;ZFP36;EMP3;GPCPD1;CEBPB;HSPA13;ITGB2;MIF;ME…
AdultSigmoidColon_T cell	Adult	Digestive system	AdultSigmoidColon	T cell	T cell	CL:0000084	Sigmoid colon	UBERON:0001159	0.0012833	0.016386	0.669373	0.0604657	1.21849	0.104238	ANXA6;ARHGEF3;BIRC3;CD3D;CD3G;CNN2;DEGS1;ELOVL5;EMB;GYPC;HCST;HIVEP2;IKZF3;ITGAL;KPNA2;LCK;MYO1G;NR4A2;PFKFB3;PHLDA1;PIM3;PITPNC1;PMAIP1;PRKCH;PSMB9;RGS2;RNF138;SLC1A4;SYTL3;TSC22D3;WIPF1;ZFP36;ZFP36L1
Fetal_HCA_Intestine_Smooth muscle cells	Fetal	Digestive system	Fetal_HCA_Intestine	Smooth muscle cells	Smooth muscle cell	CL:0000192	Intestine	UBERON:0000160	0.00064577	0.0171683	0.650923	0.0613972	1.21185	0.105575	PLOD1;RGS5;PBX1;DEGS1;NID1;FHL2;KLF7;ITPR1;LAMB2;ARHGEF3;ROBO1;TMEM45A;TSPAN5;SNCAIP;ANXA6;ADAM19;LAMA4;HOXA7;FOXP2;VIM;ENTPD1;BAG3;FGFR2;CLMP;SLC41A2;LATS2;NID2;MMP28;GJC1;SOCS3;CNN2;BST2;FOSB;EMP3;LGALS1
AdultTransverseColon_Endothelial cell (APC)	Adult	Digestive system	AdultTransverseColon	Endothelial cell (APC)	Endothelial cell	CL:0000115	Transverse colon	UBERON:0001157	0.000207839	0.0237968	0.61476	0.0764342	1.11671	0.126457	ARHGAP29;ARHGEF3;BHLHE40;BST2;CRIP2;DYSF;FAM167B;FCHSD2;FGD5;GNAI2;GRB10;HYAL1;ICAM1;IRAK2;ITPR1;KLF7;LATS2;NDRG1;PITPNC1;PLS3;PLXND1;PNP;PRKCH;RND1;ROBO1;SEC14L1;SERPING1;SETD7;SH3BP5;SLC12A4;SNCAIP;SOCS3;SPHK1;VAMP5;VIM;ZFP36;ZFP36L1
FetalIntestine_Fetal stromal cell	Fetal	Digestive system	FetalIntestine	Fetal stromal cell	Stromal cell	CL:0000499	Intestine	UBERON:0000160	0.00237	0.022644	0.693727	0.0809556	1.09175	0.132963	ANGPTL4;ANXA6;ART3;BST2;C1orf54;CNN2;ECM1;EMP3;FADS2;FKBP10;FOS;FOSB;GYPC;HSPA6;IER3;KPNA2;LAMA4;LGALS1;NID1;NID2;PHLDA1;PLS3;PLTP;RGS2;RND1;SERPINF1;SERPING1;SNCAIP;SOCS3;TMEM45A;VCAN;VIM;ZFP36
TS_Large_Intestine_mast cell	Adult	Digestive system	TS_Large_Intestine	mast cell	Mast cell	CL:0000097	Large intestine	UBERON:0000059	3.42e-14	0.0864589	0.195203	0.0857657	1.06669	0.139511	PLK3;ABCD3;ANP32E;S100A4;PBX1;MR1;RGS2;SLC41A1;DUSP10;CCDC88A;MTHFD2;ITGAV;KLF7;ITPR1;BHLHE40;SEC22C;GNAI2;NFKBIZ;PLXND1;TNIK;SLC22A4;ANXA6;DOK3;TAPBP;ELOVL5;SYTL3;SNX10;MYO1G;DNAJB9;CREB3L2;SLC44A1;HSPA5;VIM;DDIT4;FADS2;FADS1;BIRC3;C3AR1;DRAM1;PPM1A;HIF1A;TNFRSF12A;SOCS1;TRPV2;IKZF3;FMNL1;CD300A;ICAM1;ACP5;BST2;TYROBP;FOSB;EMP3;CEBPB;SLCO4A1;HSPA13;ITGB2;LGALS1;TSC22D3;ACSL4
TS_Small_Intestine_mast cell	Adult	Digestive system	TS_Small_Intestine	mast cell	Mast cell	CL:0000097	Small intestine	UBERON:0002108	4.15e-11	0.0644736	0.273801	0.0889152	1.05102	0.143811	MIER1;ARHGAP29;ABCD3;S100A4;S100A2;RGS5;PBX1;RGS2;DUSP10;LYST;CCDC88A;NR4A2;ITGAV;KLF7;ITPR1;BHLHE40;NFKBIZ;TNIK;ANXA6;DOK3;ELOVL5;TRAF3IP2;PKIB;HOXA5;CREB3L2;SLC44A1;TMEM38B;VIM;DDIT4;FADS2;FADS1;BIRC3;C3AR1;DRAM1;PPM1A;HIF1A;DUOX2;PDE8A;SOCS1;TRPV2;FMNL1;CD300A;ICAM1;BST2;IGFLR1;TYROBP;FOSB;EMP3;CD40;HSPA13;ITGB2;LGALS1;TSC22D3;ACSL4
TS_Small_Intestine_gut endothelial cell	Adult	Digestive system	TS_Small_Intestine	gut endothelial cell	Endothelial cell	CL:0000115	Small intestine	UBERON:0002108	3.45e-14	0.0928815	0.19631	0.0912497	1.03977	0.146845	FAM167B;ARHGAP29;C1orf54;ECM1;EFNA1;RGS5;SLC41A1;LYST;NID1;CCDC88A;DYSF;VAMP5;KLF7;FGD5;SH3BP5;LAMB2;GNAI2;HYAL1;ROBO1;PLXND1;HSD17B11;ABCG2;TSPAN5;SETD7;SNCAIP;MYLIP;LAMA4;NCOA7;SOD2;HOXA5;HOXA7;GRB10;NDRG1;VIM;ENTPD1;GRK5;BAG3;SERPING1;CLEC7A;LRP6;RND1;LATS2;ZFP36L1;CRIP2;ALDH1A2;ANXA2;MT2A;SLC12A4;MMP28;HOXB5;SPHK1;SOCS3;EPB41L3;OSBPL1A;TSHZ1;ICAM1;BST2;CDC25B;SLCO4A1;PLS3
AdultTransverseColon_Stromal cell	Adult	Digestive system	AdultTransverseColon	Stromal cell	Stromal cell	CL:0000499	Transverse colon	UBERON:0001157	0.00161795	0.0311664	0.678229	0.10266	0.988598	0.161374	ANXA2;ANXA6;BST2;CLMP;ECM1;EMP3;FKBP10;GRK5;LAMA4;LAMB2;LGALS1;LOXL1;MT2A;NID1;PBX1;PHLDA1;PLS3;PLTP;ROBO1;S100A4;SCPEP1;SERPINF1;SERPING1;SH3BP5;SLC16A4;SMPDL3A;SOCS3;SOD2;TMEM45A;UBE2L6;VAMP5;VCAN;VIM;ZFP36L1
TS_Small_Intestine_b cell	Adult	Digestive system	TS_Small_Intestine	b cell	B cell	CL:0000236	Small intestine	UBERON:0002108	3.98e-13	0.143439	0.21476	0.138009	0.860093	0.20709	FCGR2A;MR1;RGS2;CD55;LYST;OPN3;BCL2L11;NR4A2;WIPF1;DNAJC10;CFLAR;KLF7;AP1S3;ITPR1;IRAK2;SH3BP5;SEC22C;GNAI2;CD180;HOMER1;ANXA6;DOK3;HLA-DOB;TAPBP;SOD2;SNX10;MYO1G;ZBTB10;TMEM38B;VIM;ENTPD1;FCHSD2;BIRC3;DRAM1;MYCBP2;IRF9;HIF1A;ZFP36L1;CRIP2;TMEM170A;FMNL1;SCPEP1;RNF138;PMAIP1;CNN2;ACP5;BST2;MAP4K1;CD79A;EMP3;NAPSB;KLK1;CD40;SLCO4A1;CHCHD10;LGALS1;PIM3;TSC22D3
TS_Large_Intestine_b cell	Adult	Digestive system	TS_Large_Intestine	b cell	B cell	CL:0000236	Large intestine	UBERON:0000059	4.21e-12	0.128783	0.246125	0.141099	0.850476	0.211259	SYTL1;ANP32E;S100A4;FCGR2A;CD55;DEGS1;LYST;WIPF1;DNAJC10;CFLAR;KLF7;AP1S3;ITPR1;IRAK2;SH3BP5;SEC22C;GNAI2;EMB;CD180;ANXA6;DOK3;HLA-DOB;PSMB9;TAPBP;CCDC167;SNX10;MYO1G;VIM;ENTPD1;GRK5;FCHSD2;BIRC3;STX2;MYCBP2;IRF9;HIF1A;ZFP36L1;CRIP2;TRPV2;IKZF3;FMNL1;SCPEP1;CNN2;DENND1C;ACP5;BST2;HCST;MAP4K1;CD79A;EMP3;NAPSB;CD40;ITGB2;LGALS1;PIM3;TSC22D3
AdultSigmoidColon_Enterocyte	Adult	Digestive system	AdultSigmoidColon	Enterocyte	Enterocyte	CL:0000584	Sigmoid colon	UBERON:0001159	0.014276	0.0528634	0.753506	0.168217	0.774131	0.244218	AKAP1;ASPH;BAG3;BTG2;CENPV;DDIT4;DUSP1;FAM167B;FGFR2;FHL2;FOS;FOSB;HSPA6;HYOU1;KLK1;NEDD4L;P4HB;PCK1;PTPN21;PYY;SLC22A23;SLC25A37;SLC41A1;SPHK2;TNIK;VIL1;XBP1;ZBTB10;ZG16
FetalIntestine_Erythroid cell	Fetal	Digestive system	FetalIntestine	Erythroid cell	Erythroid lineage cell	CL:0000764	Intestine	UBERON:0000160	0.0224049	0.0923463	0.77786	0.260997	0.583364	0.350497	ACSL4;CAT;CCDC167;CD55;CFP;CITED2;DYSF;ECM1;FADS2;GNAI2;GYPC;HIF1A;HOXA3;LATS2;LYST;NFE2;PDZK1IP1;PFKFB3;PHLDA1;PLS3;PTPN21;ROBO1;S100A4;SEC14L1;SERPING1;SH3BP5;SLC25A37;STX2;SUOX
TS_Large_Intestine_intestinal enteroendocrine cell	Adult	Digestive system	TS_Large_Intestine	intestinal enteroendocrine cell	Endocrine cell	CL:0000163	Large intestine	UBERON:0000059	4.01e-07	0.231792	0.430258	0.329638	0.481963	0.42948	CAMK2N1;SERINC2;HOOK1;SELENBP1;IGSF9;PBX1;BTG2;TMEM37;DNAJC10;SATB2;STRADB;VIL1;CHDH;IL17RB;PLXNA1;ATP8A1;TSPAN5;SLC6A19;ZNF608;SMPDL3A;MAP3K5;HOXA2;HOXA3;HOXA7;BAIAP2L1;ASPH;ZBTB10;PIP5K1B;SLC44A1;HSPA5;CDHR5;STARD10;LRP6;ERBB3;MLXIP;FGF9;KLF5;C2CD4A;WNK4;PYY;ABCA5;FXYD3;SDF2L1;CHCHD10;MIF
FetalIntestine_Smooth muscle cell	Fetal	Digestive system	FetalIntestine	Smooth muscle cell	Smooth muscle cell	CL:0000192	Intestine	UBERON:0000160	0.0362026	0.135205	0.793358	0.346732	0.460007	0.448731	ANXA6;BST2;C1orf54;CCDC88A;CNN2;CRIP2;DEGS1;EMP3;ENTPD1;FHL2;FKBP10;FOXP2;KPNA2;LAMA4;LCK;LGALS1;MTHFD2;NID1;NUCB2;PBX1;PLS3;RGS5;SLC41A2;SOCS1;TMEM45A;TSPAN5;VIM;WDR44
TS_Small_Intestine_intestinal enteroendocrine cell	Adult	Digestive system	TS_Small_Intestine	intestinal enteroendocrine cell	Endocrine cell	CL:0000163	Small intestine	UBERON:0002108	2.4e-06	0.282679	0.481181	0.407373	0.390007	0.515398	AGMAT;CAMK2N1;SERINC2;HOOK1;ABCD3;PBX1;BTG2;ATF3;CCDC88A;KLF7;VIL1;CYP27A1;HIGD1A;TMEM45A;SLC6A19;SLC22A4;GCNT2;PKIB;SMPDL3A;ENPP1;ASPH;DEPTOR;IFT74;PIP5K1B;CDHR5;STARD10;CLMP;LRP6;SUOX;ERBB3;PPM1A;CRIP2;MT2A;MT1E;MARVELD3;PYY;PRR15L;SCPEP1;ABCA5;FXYD3;TMC4;BTBD3;SDF2L1
FetalIntestine_Enterocyte progenitor	Fetal	Digestive system	FetalIntestine	Enterocyte progenitor	Enterocyte	CL:0000584	Intestine	UBERON:0000160	0.0565616	0.173288	0.812546	0.416836	0.380035	0.525896	BEST4;CD55;CFLAR;CHDH;CLEC7A;CMTM4;DEPTOR;DGKD;DNAJC10;DUSP1;FOXP2;GMNN;HCST;KLF5;KLK1;LYST;LYZ;MUC1;PCK1;PDE8A;PLK3;PLXNA1;PMAIP1;S100P;SLC1A4;TAP2;WNT5A
AdultAscendingColon_T cell	Adult	Digestive system	AdultAscendingColon	T cell	T cell	CL:0000084	Ascending colon	UBERON:0001156	0.0712182	0.175264	0.821402	0.422991	0.373669	0.533166	ARHGEF3;BIRC3;CD3D;CD3G;CREB3L3;ELOVL5;ENTPD1;HCST;KPNA2;LCK;LYST;MIER1;MUC1;NR4A2;PFKFB3;PHLDA1;PIM3;PITPNC1;PRKACB;PRKCH;S100A4;SYTL3;VIM;WIPF1;ZFP36
AdultTransverseColon_Smooth muscle cell	Adult	Digestive system	AdultTransverseColon	Smooth muscle cell	Smooth muscle cell	CL:0000192	Transverse colon	UBERON:0001157	0.042574	0.182346	0.79631	0.425392	0.371211	0.534699	ANXA6;ARHGAP29;C1orf54;CRIP2;DEGS1;DYSF;ENTPD1;FADS1;FADS2;FKBP10;GJC1;ITPR1;LAMB2;LGALS1;MT1E;MT1M;MT2A;MYCBP2;PHLDA1;PLS3;RGS5;S100A4;SCPEP1;SERPING1;SNCAIP;TMEM38B;TNFRSF12A;VIM
TS_Small_Intestine_mature enterocyte	Adult	Digestive system	TS_Small_Intestine	mature enterocyte	Enterocyte	CL:0000584	Small intestine	UBERON:0002108	0.206643	0.234304	0.864207	0.525874	0.279118	0.644267	SELENBP1;EFNA1;NR5A2;DQX1;TMEM37;VIL1;SLC6A19;CLDN15;SLC25A37;PBLD;PNLIPRP2;CDHR5;ERBB3;MYO1A;PCK2;SEMA6D;MT2A;MT1E;MT1M;CD68;PRR15L;EPB41L3;CREB3L3;PCK1
FetalIntestine_CB CD34+	Fetal	Digestive system	FetalIntestine	CB CD34+	Hematopoietic stem cell	CL:0000037	Intestine	UBERON:0000160	0.0854117	0.271769	0.830258	0.561574	0.250593	0.677589	ACSL4;BIRC3;BST2;CCDC167;CD300A;CD79A;CNN2;DENND1C;EAF2;ELOVL5;EMP3;FADS2;HCST;HOXA2;KPNA2;LATS2;LYST;LYZ;MR1;MTHFD2;NAPSB;NFE2;NUCB2;PYY;S100A4;TYROBP
AdultTransverseColon_B cell	Adult	Digestive system	AdultTransverseColon	B cell	B cell	CL:0000236	Transverse colon	UBERON:0001157	0.097483	0.273045	0.8369	0.565833	0.247311	0.681515	ACP5;ACSL4;ANP32E;AP1AR;BIRC3;BST2;C3AR1;CCDC167;CD180;CD40;CD79A;CFLAR;DYSF;ELOVL5;FUT8;GNAI2;GYPC;HCST;HLA-DOB;MYO1G;NAPSB;NR4A2;S100A4;SLAMF8;SNX10;WNT5A
AdultSigmoidColon_Smooth muscle cell	Adult	Digestive system	AdultSigmoidColon	Smooth muscle cell	Smooth muscle cell	CL:0000192	Sigmoid colon	UBERON:0001159	0.189453	0.332084	0.862362	0.644476	0.190793	0.760684	ANGPTL4;CRIP2;DEGS1;DYSF;ENTPD1;GRK5;HOXA7;KLF7;LATS2;LGALS1;MIF;MRPL35;MT1E;MT1M;MT2A;MTHFD2;NQO2;PLS3;RGS5;S100A4;TMEM38B;VIM;ZFP36L1
AdultSigmoidColon_B cell	Adult	Digestive system	AdultSigmoidColon	B cell	B cell	CL:0000236	Sigmoid colon	UBERON:0001159	0.189453	0.37272	0.862362	0.686233	0.163528	0.801591	ACP5;ADAM19;ANP32E;BIRC3;BTG2;CD40;CD55;CD79A;CNN2;DEGS1;ELOVL5;EMP3;FCHSD2;FUT8;HLA-DOB;MAP4K1;MYCBP2;NAPSB;PLK3;PMAIP1;SNX10;TSC22D3;ZFP36L1
FetalIntestine_Fetal enterocyte	Fetal	Digestive system	FetalIntestine	Fetal enterocyte	Enterocyte	CL:0000584	Intestine	UBERON:0000160	0.399939	0.5612	0.904059	0.85162	0.0697541	0.946633	CHDH;DDIT4;EMP3;FKBP10;FOSB;GMNN;IL17RB;KPNA2;LGALS1;MT1E;MT2A;NID1;PLTP;PPA1;RGMB;RGS2;SOCS3;STARD10;TLE2;VCAN;VIM
AdultAscendingColon_B cell	Adult	Digestive system	AdultAscendingColon	B cell	B cell	CL:0000236	Ascending colon	UBERON:0001156	0.469114	0.590432	0.912177	0.871863	0.0595519	0.961248	ANXA6;CD79A;CLMP;CNN2;DENND1C;FMNL1;GRK5;HLA-DOB;KLK1;NAPSB;PMAIP1;S100A4;SNX10;SOCS1;TRAF3IP2;TSC22D3;WIPF1;ZBTB10;ZFP36L1
FetalIntestine_Fetal epithelial progenitor	Fetal	Digestive system	FetalIntestine	Fetal epithelial progenitor	Epithelial fate stem cell	CL:0000036	Intestine	UBERON:0000160	0.675961	0.716703	0.939483	0.939645	0.027036	0.980361	ANXA6;CCDC167;CCDC88A;CRIP2;FADS1;GJC1;HOXA5;HOXB5;KPNA2;KRT7;LAMA4;MEI1;NID1;NUCB2;PLS3;SLC41A1;TSPAN5;VIM
Fetal_HCA_Intestine_Chromaffin cells	Fetal	Digestive system	Fetal_HCA_Intestine	Chromaffin cells	Neuron	CL:0000540	Intestine	UBERON:0000160	0.829534	0.785541	0.954982	0.965812	0.0151072	0.980361	RIMKLA;RGS2;BTG2;SATB2;AP1S3;ITPR1;ATP8A1;TSPAN5;ZNF608;PKIB;SLC41A2;PRKCH;PYY;ABCA5;FXYD3;BTBD3
FetalIntestine_Fetal neuron	Fetal	Digestive system	FetalIntestine	Fetal neuron	Neuron	CL:0000540	Intestine	UBERON:0000160	0.885859	0.792457	0.969004	0.970698	0.0129161	0.980361	ACSL4;ANXA6;ARHGEF3;CCDC167;CRIP2;FADS1;FADS2;HOXA5;HOXB5;KLF7;PHLDA1;PRKACB;RGMB;SLC1A4;SNX10
TS_Large_Intestine_goblet cell	Adult	Digestive system	TS_Large_Intestine	goblet cell	Goblet cell	CL:0000160	Large intestine	UBERON:0000059	0.999989	0.808349	0.99631	0.979694	0.00890939	0.980361	MUC1;FGFR2;ZG16;WNK4;KLK1

[truncated: 2 more sheets: Table S10, Table S11]
